# Supplementary material for: Weight loss after Roux-En-Y gastric bypass surgery reveals skeletal muscle DNA methylation changes
Source: Clin Epigenetics. 2021 May 1;13:100. doi: 10.1186/s13148-021-01086-6 (PMC8088644; doi:10.1186/s13148-021-01086-6)
Supplement: Supplementary file 6 — Additional file 6. Differentially methylated cytosines (n = 2885) significantly altered in methylation post-surgery obese versus lean (Benjamini Hochberg q < 0.05). [file 13148_2021_1086_MOESM6_ESM.xlsx]

## Sheet: Sheet1
Additional File 6. Differentially methylated cytosines (n=2,885) significantly altered in methylation post-surgery obese versus lean (Benjamini Hochberg q<0.05)
Chr	Position	Gene	Post-surgery methylation %		Lean methylation %		P value	q value	Genic region	Cpg region
			Average	SEM	Average	SEM
chr1	10083891	-	8.11514	1.76498	49.3147	5.12255	1.71415e-24	3.9684e-18	intergenic	InterCpgi
chr1	21966330	RAP1GAP	35.4797	1.89658	66.6618	1.71552	3.10924e-18	3.59907e-12	utr5	InterCpgi
chr5	174646090	-	41.7735	5.66012	95.3125	2.99196	1.41661e-16	1.09319e-10	intergenic	InterCpgi
chr1	62390728	INADL	21.0046	2.22789	57.5471	3.89662	2.16824e-16	1.25491e-10	intron	InterCpgi
chr15	64444948	SNX22	17.6297	3.78168	68.6765	3.77515	3.27439e-15	1.5161e-09	intron	south_shore
chr1	9924547	CTNNBIP1	60.8324	1.79296	19.5689	7.34332	1.60536e-14	6.19423e-09	intron	InterCpgi
chr1	10083941	-	67.3344	4.05692	20.6199	5.7668	6.24224e-14	2.06447e-08	intergenic	InterCpgi
chr2	32519908	YIPF4	91.0747	2.02137	62.814	8.08936	1.0257e-13	2.96822e-08	intron	InterCpgi
chr2	198505382	RFTN2	58.3892	2.58194	84.651	2.35413	1.3368e-13	3.43866e-08	intron	InterCpgi
chr19	4099305	MAP2K2	38.0776	3.86364	82.0063	2.598	2.01297e-13	4.66018e-08	exon	north_shore
chr1	115569109	TSHB	32.1686	0.832063	60.1514	5.02458	3.37416e-13	7.10134e-08	intergenic	InterCpgi
chr20	47399294	PREX1	52.4169	9.91039	7.51984	1.30304	8.3536e-13	1.61161e-07	intron	InterCpgi
chr14	105942216	CRIP2	3.07607	0.895058	28.5268	2.61731	2.25929e-12	4.02342e-07	exon	south_shore
chr12	133127247	FBRSL1	20.4758	2.67312	54.1036	4.86003	2.95585e-12	4.88788e-07	intron	south_shore
chr2	91704224	-	16.2492	2.83763	42.596	6.47945	3.83675e-12	5.57752e-07	intergenic	InterCpgi
chr6	169332441	-	88.8069	1.60366	51.1268	5.93427	3.85474e-12	5.57752e-07	intergenic	south_shore
chr14	93670497	C14orf142	56.2762	8.14306	95.6522	2.51022	4.12711e-12	5.62035e-07	intron	north_shelf
chr14	93670497	UBR7	56.2762	8.14306	95.6522	2.51022	4.12711e-12	5.62035e-07	intron	north_shelf
chr1	25541014	-	52.7333	5.08719	13.12	4.37699	4.46282e-12	5.73989e-07	intergenic	InterCpgi
chr1	100253784	-	59.6093	6.53883	0	0	7.24815e-12	8.6928e-07	intergenic	InterCpgi
chr11	556313	RASSF7	4.98468	1.17781	22.7448	8.80371	7.50971e-12	8.6928e-07	exon	CpG_Island
chr11	556313	C11orf35	4.98468	1.17781	22.7448	8.80371	7.50971e-12	8.6928e-07	exon	CpG_Island
chr1	228079192	-	88.9801	2.74963	51.887	8.65303	1.43376e-11	1.58061e-06	intergenic	south_shelf
chr12	122257890	SETD1B	93.9418	2.01658	59.0267	9.98319	4.58213e-11	4.82182e-06	intron	south_shelf
chr19	7997335	TIMM44	100	0	76.9078	3.73957	5.44002e-11	5.47569e-06	intron	north_shore
chr10	3451620	-	95.2041	1.76623	52.6271	12.5356	6.18621e-11	5.96733e-06	intergenic	InterCpgi
chr3	107237547	BBX	49.8277	9.28018	75.5714	5.57854	6.98565e-11	6.46894e-06	intergenic	InterCpgi
chr8	57145320	-	100	0	70.6197	2.44655	8.81576e-11	7.8497e-06	intergenic	InterCpgi
chr16	4368806	-	8.18502	2.00937	34.3956	2.53039	9.49441e-11	8.14087e-06	intergenic	south_shore
chr1	31597302	-	16.8571	2.66378	39.2482	5.28111	1.32875e-10	1.09863e-05	intergenic	InterCpgi
chr4	1623041	-	41.688	1.45648	62.2849	6.77777	1.58967e-10	1.26904e-05	intergenic	north_shelf
chr4	169753991	PALLD	1.05402	0.695387	27.6472	7.06148	1.85583e-10	1.43213e-05	utr5	CpG_Island
chr19	18888529	CRTC1	37.911	1.73611	6.94664	2.33159	2.98526e-10	2.19554e-05	utr3	CpG_Island
chr2	65196216	-	44.0766	4.00515	9.97146	3.74299	3.03476e-10	2.19554e-05	intergenic	InterCpgi
chr7	151393354	PRKAG2	96.8296	1.71349	52.0887	13.1191	3.3544e-10	2.35325e-05	intron	InterCpgi
chr9	129245078	FAM125B	28.186	5.62652	72.7743	4.94771	3.83337e-10	2.61017e-05	intron	CpG_Island
chr1	11734277	FBXO6	92.5739	1.98269	66.4335	6.46765	3.95611e-10	2.61678e-05	utr3	InterCpgi
chr5	1779202	-	5.14433	1.54472	26.9225	7.8671	4.20816e-10	2.70618e-05	intergenic	InterCpgi
chr19	3194244	NCLN	77.0364	7.77104	3.125	3.125	5.43944e-10	3.40345e-05	intron	south_shore
chr10	3848313	-	8.00673	2.27312	39.7536	4.53448	6.17173e-10	3.71436e-05	intergenic	InterCpgi
chr22	19677977	-	8.91775	4.96912	57.197	6.5059	6.41767e-10	3.71436e-05	intergenic	InterCpgi
chr7	1704228	-	0	0	20.0216	5.38848	6.41179e-10	3.71436e-05	intergenic	CpG_Island
chr2	146739065	-	62.4133	3.18762	24.8081	5.21316	9.13093e-10	4.97408e-05	intergenic	InterCpgi
chr3	49005790	ARIH2	65.1907	3.67084	21.0471	7.40656	9.07181e-10	4.97408e-05	intron	InterCpgi
chr7	985674	ADAP1	75.2564	2.64807	44.2427	2.47194	9.23877e-10	4.97408e-05	promoter	CpG_Island
chr1	28428478	-	71.5488	4.11301	100	0	1.12213e-09	5.90414e-05	intergenic	InterCpgi
chr2	241757752	KIF1A	0	0	43.8265	11.1855	1.16182e-09	5.97714e-05	utr5	north_shore
chr17	79455873	-	20.1493	1.85938	44.707	4.22138	1.27348e-09	6.40915e-05	intergenic	south_shore
chr1	23962504	MDS2	93.6775	0.45606	80.3575	3.43225	1.43411e-09	7.064e-05	intergenic	InterCpgi
chr1	85576027	WDR63	0.892494	0.446779	10.9244	4.2684	1.60055e-09	7.71961e-05	intron	InterCpgi
chr1	9099325	SLC2A5	79.2659	2.75398	44.665	5.01109	1.84477e-09	8.71593e-05	intron	CpG_Island
chr10	77156058	-	17.076	2.34035	37.9527	4.53055	2.06854e-09	9.5777e-05	intergenic	CpG_Island
chr3	128296826	C3orf27	15.1333	4.08694	66.6667	6.80414	2.32364e-09	0.000103451	promoter	InterCpgi
chr7	5595134	-	0	0	8.36364	3.01247	2.29542e-09	0.000103451	intergenic	CpG_Island
chr3	181032924	-	85.4508	3.06169	57.3864	5.96816	2.48196e-09	0.000108414	intergenic	InterCpgi
chr18	6972916	LAMA1	27.452	4.49243	65.5644	11.8038	2.53043e-09	0.000108484	intron	InterCpgi
chr9	112889746	PALM2-AKAP2	16.6103	2.41077	37.4509	9.36118	2.79998e-09	0.000117858	utr5	InterCpgi
chr9	112889746	AKAP2	16.6103	2.41077	37.4509	9.36118	2.79998e-09	0.000117858	utr5	InterCpgi
chr1	24165890	-	4.72984	0.412247	9.59919	2.1614	3.17861e-09	0.00012793	intergenic	InterCpgi
chr14	71847895	-	96.1482	1.74324	78.6415	7.58472	3.2603e-09	0.00012793	intergenic	InterCpgi
chr16	30536187	ZNF768	52.7155	3.94305	89.3327	1.45879	3.22658e-09	0.00012793	exon	CpG_Island
chr21	22358632	-	97.5682	1.31892	75.0271	3.97285	3.10684e-09	0.00012793	intergenic	InterCpgi
chr11	71952460	PHOX2A	46.8342	2.90228	73.123	5.37369	3.49791e-09	0.000134966	intron	CpG_Island
chr8	99954685	OSR2	26.337	0.401065	43.5462	11.1921	3.70736e-09	0.000140702	utr5	CpG_Island
chr1	3112360	PRDM16	6.17385	1.27588	30.303	13.1653	3.81633e-09	0.000142502	intron	south_shore
chr3	189314221	-	54.8512	7.29659	2.08333	2.08333	3.89664e-09	0.000143191	intergenic	InterCpgi
chr3	126701136	-	7.74199	2.2041	32.5653	3.42229	4.2099e-09	0.000152285	intergenic	north_shore
chr1	21648212	ECE1	75.357	5.04593	13.3333	8.16497	4.39402e-09	0.0001565	intron	InterCpgi
chr1	33775652	-	3.80035	0.743996	20.6044	5.86013	4.63881e-09	0.000162716	intron	south_shelf
chr3	49999124	RBM6	99.1071	0.892857	83.3575	0.677932	4.82136e-09	0.000166595	utr5	InterCpgi
chr3	93763107	ARL13B	70.6836	6.74102	11.8304	4.08143	4.99073e-09	0.000167449	intron	InterCpgi
chrX	153220282	HCFC1	86.3727	1.84835	45.0092	11.9395	4.92904e-09	0.000167449	exon	CpG_Island
chr11	134815081	-	57.3588	4.45561	90.8524	4.11529	5.15174e-09	0.000167982	intergenic	InterCpgi
chr7	73448424	ELN	13.2399	1.78149	34.7052	4.52787	5.10968e-09	0.000167982	intron	InterCpgi
chr15	42167108	SPTBN5	88.7134	1.49299	100	0	5.41473e-09	0.00017172	exon	InterCpgi
chr20	61492141	TCFL5	18.2352	1.51888	34.0856	2.93638	5.34316e-09	0.00017172	intron	CpG_Island
chr1	9864293	CLSTN1	38.708	4.75567	65.7393	4.78068	5.54321e-09	0.000173419	intron	InterCpgi
chrX	48748533	-	43.3167	4.67673	12.2835	1.90627	5.91803e-09	0.000182677	intergenic	CpG_Island
chr16	89050414	-	68.2164	4.14977	95.7534	1.78015	6.21002e-09	0.000189167	intergenic	InterCpgi
chr3	49839767	CDHR4	42.2059	4.62672	71.9171	5.43673	6.47489e-09	0.000194674	promoter	north_shore
chr3	49839767	C3orf54	42.2059	4.62672	71.9171	5.43673	6.47489e-09	0.000194674	promoter	north_shore
chr10	15360342	FAM171A1	51.0208	3.47296	18.0373	5.87518	6.62326e-09	0.000195733	intron	InterCpgi
chr15	99194558	IGF1R	16.9445	2.45031	45.1039	6.0665	6.67919e-09	0.000195733	promoter	CpG_Island
chr19	1291614	EFNA2	42.7104	2.75625	65.6382	4.45169	6.91379e-09	0.000199143	intron	south_shore
chr19	405638	C2CD4C	19.7392	7.34494	79.4658	4.65667	7.13966e-09	0.000199143	utr3	south_shore
chr7	25891815	-	29.8828	3.06915	65.2841	5.26614	7.10727e-09	0.000199143	intergenic	north_shore
chrX	58317571	-	26.3871	1.41042	55.7937	6.39813	7.09207e-09	0.000199143	intergenic	InterCpgi
chr19	33716409	SLC7A10	17.4639	2.62327	0	0	7.24764e-09	0.000199749	intron	CpG_Island
chr13	113746799	MCF2L	58.3916	3.08509	20.8313	4.49772	7.34107e-09	0.000199943	intron	south_shore
chr1	35684665	-	79.3178	0.984352	68.055	1.80309	7.62006e-09	0.000202771	intergenic	InterCpgi
chr19	3320390	-	28.877	4.38575	0	0	7.61499e-09	0.000202771	intergenic	InterCpgi
chr2	10830688	NOL10	11.1029	3.79279	48.8398	1.99504	7.89427e-09	0.00020768	promoter	south_shore
chr7	1539343	INTS1	61.6126	3.62705	14.1667	8.90479	8.33786e-09	0.000216886	intron	south_shore
chr19	30020242	VSTM2B	0	0	9.27751	1.7362	8.66572e-09	0.00022291	intron	CpG_Island
chr19	45667915	NKPD1	28.235	2.24087	52.6976	1.65883	9.00723e-09	0.000226657	intron	InterCpgi
chr19	45667915	TRAPPC6A	28.235	2.24087	52.6976	1.65883	9.00723e-09	0.000226657	intron	InterCpgi
chr7	35782901	-	89.8467	2.11698	67.5479	5.80503	8.92795e-09	0.000226657	intergenic	InterCpgi
chr6	110815038	-	78.4722	2.51301	98.6111	1.38889	9.15679e-09	0.000227943	intergenic	InterCpgi
chr16	1143774	C1QTNF8	37.8748	5.27649	79.2694	3.91715	9.41376e-09	0.000231847	exon	CpG_Island
chr15	79281021	RASGRF1	8.37282	1.79916	36.9792	10.211	9.77361e-09	0.000238176	intron	InterCpgi
chr1	29032534	GMEB1	100	0	92.4376	1.82193	1.0704e-08	0.000258131	intron	InterCpgi
chr1	2403794	PLCH2	31.9985	2.57621	69.102	6.09737	1.25608e-08	0.000299788	intron	InterCpgi
chr2	157184767	NR4A2	29.8192	3.55733	64.216	5.25712	1.27057e-08	0.00030015	intron	south_shore
chr2	20824498	HS1BP3	82.1894	7.54676	10.7143	10.7143	1.32565e-08	0.000309998	exon	InterCpgi
chr1	26240278	-	35.2388	2.099	14.6624	4.17187	1.34963e-08	0.000312451	intergenic	InterCpgi
chr2	241855628	-	53.5197	2.85195	71.0409	1.15071	1.4244e-08	0.000326494	intergenic	CpG_Island
chr1	226613302	-	42.5222	3.18939	77.6818	2.72842	1.54176e-08	0.000346592	intergenic	InterCpgi
chr16	7307129	RBFOX1	67.2629	2.3322	88.0028	2.08102	1.54202e-08	0.000346592	intron	InterCpgi
chr17	7365924	ZBTB4	48.4797	3.40311	12.8971	1.22932	1.61177e-08	0.000355462	exon	CpG_Island
chr19	18561076	ELL	68.8286	2.97752	26.3003	8.88601	1.61219e-08	0.000355462	intron	south_shelf
chr1	45950571	TESK2	96.5993	1.39271	79.191	4.0554	1.67987e-08	0.000363461	utr5	InterCpgi
chr5	174646089	-	50.5611	9.17137	81.4665	2.29978	1.66811e-08	0.000363461	intergenic	InterCpgi
chr1	16826569	-	73.4554	1.64887	57.6103	2.74288	1.69715e-08	0.000363799	intergenic	south_shore
chr3	100038498	TBC1D23	3.40193	0.543779	13.2204	1.85863	1.74088e-08	0.00036975	intron	InterCpgi
chr11	1242169	MUC5B	10.2154	2.44028	48.315	13.993	1.79596e-08	0.000377397	intergenic	InterCpgi
chr16	89777825	C16orf7	78.5359	2.61173	98.6842	1.31579	1.80949e-08	0.000377397	intron	CpG_Island
chr16	89777825	LOC100128881	78.5359	2.61173	98.6842	1.31579	1.80949e-08	0.000377397	intron	CpG_Island
chr3	195959860	OSTalpha	45.2224	6.24992	88.8889	0.982093	1.82936e-08	0.000378137	intron	InterCpgi
chr11	73668762	DNAJB13	39.0746	3.73408	69.2823	3.2737	1.94093e-08	0.000397646	intron	InterCpgi
chr8	144040997	-	68.8257	4.93372	6.81818	6.81818	1.99936e-08	0.000406025	intergenic	InterCpgi
chr16	1265854	CACNA1H	48.3844	4.35809	6.81818	6.81818	2.05797e-08	0.000414293	intron	south_shore
chr6	2915202	-	72.2414	4.47128	35.6081	1.72406	2.17762e-08	0.000434602	intergenic	InterCpgi
chr17	26294842	-	43.5227	4.65199	81.8452	2.34975	2.21846e-08	0.000438967	intergenic	InterCpgi
chr16	85325250	-	63.9696	7.36081	95.7516	2.67495	2.38972e-08	0.000468847	intergenic	InterCpgi
chr10	59082215	-	93.8474	0.83009	80.9144	1.71422	2.50601e-08	0.000482923	intergenic	InterCpgi
chr10	79396585	KCNMA1	18.0801	1.45196	40.6607	4.76607	2.53278e-08	0.000482923	exon	CpG_Island
chr1	6587207	NOL9	87.0323	1.79334	63.8024	4.29306	2.51241e-08	0.000482923	intron	InterCpgi
chr7	1052735	C7orf50	13.4846	2.51214	36.6239	1.99187	2.5449e-08	0.000482923	intron	CpG_Island
chr11	2184040	INS-IGF2	45.058	3.19481	69.8623	3.83849	2.70273e-08	0.000506289	promoter	north_shelf
chr11	2184040	INS	45.058	3.19481	69.8623	3.83849	2.70273e-08	0.000506289	promoter	north_shelf
chr1	14258905	-	97.9196	1.03435	57.9861	13.1074	2.71178e-08	0.000506289	intergenic	InterCpgi
chr13	23318042	-	94.4684	1.86077	66.3889	7.70051	2.86789e-08	0.000531152	intergenic	InterCpgi
chr9	94766159	-	34.6506	5.52188	0	0	2.89997e-08	0.000532831	intergenic	InterCpgi
chr10	77156310	NCRNA00245	12.4345	2.28601	43.0922	10.8422	3.01921e-08	0.00054184	intergenic	CpG_Island
chr14	105942282	CRIP2	15.4198	2.8431	40.635	4.31488	3.00607e-08	0.00054184	exon	south_shore
chr4	7790016	AFAP1	32.6345	2.79123	59.3744	6.37739	2.97807e-08	0.00054184	intron	InterCpgi
chr19	48845930	TMEM143	70.4298	4.8084	100	0	3.05348e-08	0.000543775	exon	InterCpgi
chr5	1181497	-	62.0833	2.83291	32.3611	2.66797	3.11902e-08	0.000551205	intergenic	InterCpgi
chr14	99855762	-	0	0	10.5403	4.10818	3.48098e-08	0.000610513	intergenic	InterCpgi
chr10	307450	-	97.617	1.24017	65.4762	15.5784	3.5634e-08	0.000611079	intergenic	InterCpgi
chr3	163216821	-	97.5798	0.910675	88.8826	3.82896	3.51753e-08	0.000611079	intergenic	InterCpgi
chr6	46655732	TDRD6	72.5455	2.6413	37.2962	5.92152	3.55269e-08	0.000611079	utr5	CpG_Island
chr16	4382375	GLIS2	65.6808	5.18845	27.7173	3.42845	3.71794e-08	0.000619976	exon	InterCpgi
chr1	71511748	PTGER3	88.6704	1.33716	70.6885	4.42509	3.70169e-08	0.000619976	intron	north_shore
chr18	12287174	-	43.4343	5.16945	72.3764	4.97066	3.71715e-08	0.000619976	intergenic	north_shore
chrX	103411742	FAM199X	38.246	4.62354	4.22619	3.15027	3.7224e-08	0.000619976	intron	CpG_Island
chr1	167651567	RCSD1	73.4753	3.25673	31.0624	5.2871	3.81158e-08	0.000620356	intron	InterCpgi
chr22	46362752	WNT7B	76.0262	2.39232	97.2222	2.77778	3.78544e-08	0.000620356	intron	north_shelf
chr4	53587605	-	64.0948	5.89919	90.9769	2.15067	3.83186e-08	0.000620356	intergenic	north_shore
chr5	72747139	FOXD1	0	0	13.9924	3.78404	3.82872e-08	0.000620356	intergenic	CpG_Island
chr16	67199581	NOL3	11.807	2.67599	41.1444	11.1197	3.8609e-08	0.000620716	intron	CpG_Island
chr16	67199581	HSF4	11.807	2.67599	41.1444	11.1197	3.8609e-08	0.000620716	intron	CpG_Island
chr5	7549934	ADCY2	74.7537	7.72595	12.5	7.5	3.89158e-08	0.000621333	intron	InterCpgi
chr16	1068134	-	58.4343	4.01201	91.8384	3.52566	3.94109e-08	0.000624508	intergenic	north_shore
chr16	80092283	-	13.1693	1.96026	0	0	3.97867e-08	0.000624508	intergenic	InterCpgi
chr19	50135073	-	43.4516	3.40694	70.9167	1.75	4.0035e-08	0.000624508	intergenic	InterCpgi
chr8	638338	ERICH1	0	0	13.0757	4.71818	4.01937e-08	0.000624508	intron	south_shore
chr10	43698883	RASGEF1A	63.6089	1.98613	80.4039	2.79148	4.17969e-08	0.000645089	intron	south_shore
chr2	235156535	-	54.338	1.77002	17.7409	7.66218	4.29686e-08	0.00065878	intergenic	InterCpgi
chr2	19556860	OSR1	30.998	2.65494	53.0359	2.57202	4.50898e-08	0.000682265	utr5	CpG_Island
chrX	124824925	-	90.5518	3.28043	64.6429	3.56547	4.50721e-08	0.000682265	intergenic	InterCpgi
chr10	57373797	-	13.4129	1.85912	38.2972	5.76745	4.5504e-08	0.000684062	intergenic	InterCpgi
chr15	67326584	-	39.347	4.50859	66.4719	4.28605	4.62813e-08	0.000691259	intergenic	south_shore
chr3	46709805	-	44.5496	4.18146	10.9019	3.97931	4.75276e-08	0.00070341	intergenic	InterCpgi
chr9	139972615	UAP1L1	3.77796	0.885109	19.8193	3.19096	4.77025e-08	0.00070341	exon	CpG_Island
chr20	46579792	-	15.4338	1.86596	38.7915	4.80049	4.93721e-08	0.000723422	intergenic	CpG_Island
chr8	43035443	HGSNAT	92.24	1.71385	69.0933	5.64229	5.056e-08	0.000736168	intron	InterCpgi
chr10	12450285	CAMK1D	34.4084	2.73567	62.1816	6.16086	5.12675e-08	0.000738248	intron	InterCpgi
chr11	1375864	-	29.6666	6.08761	2.15201	1.25645	5.13407e-08	0.000738248	intergenic	InterCpgi
chr19	38120474	-	62.2652	3.09368	38.9495	1.06641	5.30793e-08	0.000758537	intergenic	InterCpgi
chr1	88933136	-	100	0	90.4349	3.32398	5.36434e-08	0.000761207	intergenic	InterCpgi
chr20	55787494	BMP7	54.548	4.52367	91.9067	2.8991	5.39237e-08	0.000761207	intron	InterCpgi
chr1	21966310	RAP1GAP	36.5208	1.84873	63.634	4.00533	5.55147e-08	0.000778917	utr5	InterCpgi
chr2	42329917	-	27.5393	3.93683	69.6048	5.48439	5.59653e-08	0.000780507	intergenic	south_shore
chr3	31871578	OSBPL10	82.0763	3.13164	99.2754	0.724638	5.89247e-08	0.000811998	exon	InterCpgi
chr3	37540164	ITGA9	28.6234	4.18419	57.915	1.484	5.89186e-08	0.000811998	intron	InterCpgi
chr9	43591229	-	45.3421	5.3663	6.18056	2.56193	5.96822e-08	0.00081757	intergenic	InterCpgi
chr1	36577893	-	95.4584	1.37325	80.4778	7.49746	6.00979e-08	0.000818421	utr5	InterCpgi
chr19	18113586	ARRDC2	67.9912	5.3961	24.7539	4.43613	6.18932e-08	0.000837941	intron	south_shore
chr10	125650855	CPXM2	3.13972	2.15057	26.1199	3.18491	6.30872e-08	0.000848069	intron	CpG_Island
chr15	30302159	-	55.51	1.98814	80.3792	4.44282	6.37403e-08	0.000848069	intergenic	InterCpgi
chr7	6066005	EIF2AK1	64.0169	3.37037	24.2754	8.12058	6.36668e-08	0.000848069	intron	InterCpgi
chr17	25757400	LOC440419	28.8922	5.50871	70.4956	4.23025	6.87055e-08	0.000908908	exon	InterCpgi
chr15	90818308	-	99.4505	0.549451	75.7127	8.4182	6.98585e-08	0.000918911	intergenic	north_shore
chr10	5745616	C10orf18	95.1971	1.52676	72.9069	7.98742	7.20217e-08	0.00093672	utr5	InterCpgi
chr7	1408902	-	0	0	9.70395	3.41192	7.20195e-08	0.00093672	intergenic	south_shore
chr11	68141102	LRP5	47.8506	3.60109	77.7484	2.26857	7.2678e-08	0.000939976	utr5	InterCpgi
chr2	237476689	CXCR7	2.43006	1.36868	15.4145	1.41328	7.40302e-08	0.000952145	intergenic	CpG_Island
chr1	1245338	PUSL1	16.7592	2.22203	41.7626	5.19952	7.53233e-08	0.000963424	intron	south_shore
chr1	1245338	ACAP3	16.7592	2.22203	41.7626	5.19952	7.53233e-08	0.000963424	intron	south_shore
chr1	185618385	-	100	0	88.3753	1.93762	7.74756e-08	0.000985507	intergenic	InterCpgi
chr1	10958640	-	11.4624	1.89841	41.9429	5.60169	8.20271e-08	0.0010377	intergenic	InterCpgi
chr15	40544770	PAK6	1.19831	0.80792	16.8528	3.72121	8.30779e-08	0.00104528	utr5	CpG_Island
chr15	40544770	C15orf56	1.19831	0.80792	16.8528	3.72121	8.30779e-08	0.00104528	utr5	CpG_Island
chr1	36829134	STK40	5.63975	1.41871	21.0441	4.36637	8.88933e-08	0.00110767	utr5	InterCpgi
chr7	91585570	AKAP9	46.1932	3.62248	79.4892	4.59206	8.89934e-08	0.00110767	intron	InterCpgi
chr17	75375881	2020-09-09	28.9183	4.76574	0	0	9.04802e-08	0.00112016	utr5	InterCpgi
chr16	19200369	SYT17	44.9546	2.38384	14.9441	2.57272	9.098e-08	0.00112035	intron	InterCpgi
chr1	3514266	MEGF6	22.9319	4.08561	55.0944	2.86358	9.2043e-08	0.00112745	intron	south_shelf
chr16	1205279	CACNA1H	67.5397	3.36811	100	0	9.46825e-08	0.00115367	intron	south_shore
chrX	129149295	BCORL1	46.7704	3.78421	19.0625	4.54649	9.62643e-08	0.00116681	exon	InterCpgi
chr17	75386092	2020-09-09	30.5711	1.58236	56.1886	4.65103	9.83122e-08	0.00117928	utr5	InterCpgi
chr7	155185103	-	40.0201	4.55507	5.34852	1.89456	9.78937e-08	0.00117928	intergenic	InterCpgi
chr9	99798494	CTSL2	97.5715	1.20736	80.7698	2.89441	1.00207e-07	0.00119582	intron	north_shelf
chr12	31004353	-	0.809262	0.529383	15.2866	5.61241	1.037e-07	0.00123115	intergenic	InterCpgi
chr6	170759182	-	71.9625	2.57057	44.4912	11.336	1.0532e-07	0.001244	intergenic	south_shelf
chr18	7309217	-	100	0	88.7626	4.63059	1.062e-07	0.00124803	intergenic	InterCpgi
chr1	37476532	GRIK3	70.5897	2.15878	83.2631	2.70864	1.07731e-07	0.00125962	intron	InterCpgi
chrX	67718919	YIPF6	16.3235	1.63057	37.1136	4.94493	1.10709e-07	0.00128794	exon	CpG_Island
chr1	55007265	-	6.79955	0.878297	19.1246	1.71234	1.11478e-07	0.0012904	intergenic	north_shore
chr1	45194431	-	93.9963	1.75305	74.3434	10.2991	1.12424e-07	0.00129133	intergenic	south_shelf
chr7	4980395	MMD2	30.9726	2.27748	10.1768	3.26316	1.12674e-07	0.00129133	intron	InterCpgi
chr21	46909674	COL18A1	19.2772	5.25367	75.3571	10.3571	1.13251e-07	0.00129155	intron	north_shelf
chr10	103070222	-	7.35678	2.12616	41.5476	3.45238	1.15134e-07	0.00130659	intergenic	north_shore
chr6	41376904	-	4.54277	0.905344	19.1497	3.91851	1.16499e-07	0.00130925	intergenic	CpG_Island
chrX	70640658	BCYRN1	97.2923	1.41795	70.6151	6.88012	1.16373e-07	0.00130925	intron	InterCpgi
chrX	70640658	TAF1	97.2923	1.41795	70.6151	6.88012	1.16373e-07	0.00130925	intron	InterCpgi
chr8	48255064	KIAA0146	66.1327	3.59299	40.5377	3.88466	1.19487e-07	0.00133634	intron	InterCpgi
chr2	133013998	ANKRD30BL	66.4545	3.69109	26.9183	6.4361	1.22612e-07	0.0013647	intergenic	CpG_Island
chr1	10396299	KIF1B	90.1361	0.738697	83.004	1.12988	1.26156e-07	0.00138228	intron	InterCpgi
chr1	209438800	-	53.9166	2.26996	73.5987	4.04704	1.2579e-07	0.00138228	intergenic	InterCpgi
chr19	4175142	SIRT6	57.7494	5.63667	94.8849	3.01891	1.26134e-07	0.00138228	exon	south_shore
chr3	49753405	RNF123	25.9671	2.73431	6.87823	2.31898	1.2658e-07	0.00138228	exon	north_shelf
chr20	61049553	GATA5	23.0528	2.51134	39.4113	2.84273	1.29419e-07	0.00140518	intron	CpG_Island
chr6	140320885	-	1.2482	0.712608	10.6446	4.76302	1.29891e-07	0.00140518	intergenic	InterCpgi
chr1	25090694	CLIC4	70.0094	3.17021	85.2725	4.75313	1.30517e-07	0.00140539	intron	InterCpgi
chr1	237473059	RYR2	90.2153	2.74956	58.7946	7.00514	1.33202e-07	0.00141455	intron	InterCpgi
chr15	59452863	MYO1E	24.3687	1.92916	49.3928	5.0901	1.32854e-07	0.00141455	intron	InterCpgi
chr9	117349065	ATP6V1G1	100	0	88.2197	2.4559	1.32854e-07	0.00141455	promoter	north_shore
chr11	75139493	KLHL35	6.91116	2.25694	29.4595	7.02081	1.39492e-07	0.00146789	exon	CpG_Island
chr3	48466730	PLXNB1	43.5421	3.7726	76.1132	8.03692	1.39174e-07	0.00146789	utr5	north_shelf
chr7	127881351	LEP	23.8078	3.76849	0	0	1.41219e-07	0.00147934	utr5	CpG_Island
chr7	1708794	-	40.9812	3.71738	68.6492	3.18103	1.42139e-07	0.00148227	intergenic	CpG_Island
chr11	60719213	SLC15A3	7.27025	1.55656	20.5585	4.4882	1.43199e-07	0.00148246	utr5	south_shore
chr7	533885	-	92.483	2.66736	51.3355	6.21153	1.43438e-07	0.00148246	intergenic	CpG_Island
chr19	2291172	LINGO3	3.14217	0.846034	22.1383	4.62981	1.46711e-07	0.00150955	exon	CpG_Island
chr11	115504822	-	100	0	76.511	4.425	1.479e-07	0.00151222	intergenic	InterCpgi
chr1	147718730	-	13.7514	2.82198	0	0	1.48953e-07	0.00151222	intron	CpG_Island
chr1	148758999	-	93.9383	2.51318	70.3035	3.87314	1.4908e-07	0.00151222	intergenic	north_shore
chr13	53389632	-	66.5598	5.90846	29.4722	4.39214	1.49583e-07	0.00151222	intergenic	InterCpgi
chr10	57023722	-	8.99734	1.81458	27.1408	1.95654	1.51562e-07	0.00151895	intergenic	InterCpgi
chr22	19747235	TBX1	35.7254	4.12267	65.2207	6.53847	1.51132e-07	0.00151895	intron	south_shore
chr19	35791038	MAG	25.1159	3.62837	3.27273	2.15642	1.55386e-07	0.00154073	intron	CpG_Island
chr22	42679404	-	0	0	20.1236	6.74745	1.55732e-07	0.00154073	intergenic	CpG_Island
chrX	48660866	HDAC6	4.4127	1.04982	19.6464	3.90178	1.54742e-07	0.00154073	utr5	south_shore
chrX	48748541	-	31.3564	3.42936	5.49242	2.08333	1.56871e-07	0.00154541	intergenic	CpG_Island
chr15	22940706	CYFIP1	100	0	83.2237	6.06252	1.58074e-07	0.00155065	intron	InterCpgi
chr2	95524070	ANKRD20A8P	30.4573	2.07878	16.038	2.47531	1.6241e-07	0.00158646	promoter	CpG_Island
chr12	113606137	DDX54	36.8208	4.94817	9.30556	2.51922	1.68598e-07	0.00162308	intron	InterCpgi
chr12	56589673	-	26.899	2.95517	54.7387	6.14391	1.68962e-07	0.00162308	intergenic	InterCpgi
chr14	106938265	NCRNA00221	75.6385	1.71057	90.7601	1.74357	1.67857e-07	0.00162308	intergenic	CpG_Island
chr17	927551	ABR	38.8389	5.31968	82.2815	3.63965	1.66967e-07	0.00162308	promoter	south_shore
chr17	927551	MIR3183	38.8389	5.31968	82.2815	3.63965	1.66967e-07	0.00162308	promoter	south_shore
chr17	56565215	HSF5	4.32631	1.51369	25.5133	5.0911	1.70336e-07	0.00162952	exon	CpG_Island
chr11	76507568	TSKU	22.4704	2.77395	55.5105	8.75061	1.71559e-07	0.00163446	exon	north_shelf
chr1	1141787	TNFRSF18	0	0	15.4167	5.41667	1.78105e-07	0.00166974	exon	CpG_Island
chr16	88531564	ZFPM1	77.9833	4.14387	100	0	1.77836e-07	0.00166974	intron	InterCpgi
chr19	13213820	LYL1	16.0536	3.48168	46.2405	4.25818	1.78147e-07	0.00166974	utr5	CpG_Island
chr2	10444453	HPCAL1	6.31969	1.032	16.5958	3.11138	1.77477e-07	0.00166974	utr5	CpG_Island
chr19	42639962	MIR4323	97.6197	1.30692	80.2173	3.28396	1.93396e-07	0.00180105	intergenic	south_shelf
chr19	42639962	POU2F2	97.6197	1.30692	80.2173	3.28396	1.93396e-07	0.00180105	intergenic	south_shelf
chr5	17062407	-	94.7725	1.47646	72.7986	3.97218	1.93713e-07	0.00180105	intergenic	InterCpgi
chr15	31685132	-	36.482	5.62152	66.419	2.28502	1.97548e-07	0.00182363	intron	CpG_Island
chr16	4368849	-	42.5479	4.63247	78.3433	7.24661	1.97717e-07	0.00182363	intergenic	south_shore
chr11	128813534	TP53AIP1	62.2424	3.48797	87.0337	3.27364	1.99717e-07	0.00183477	promoter	InterCpgi
chr1	117758319	VTCN1	43.8964	2.42907	72.273	6.92699	2.08565e-07	0.00190848	intergenic	InterCpgi
chr4	181443112	-	87.4104	3.53288	55.6199	6.72025	2.09828e-07	0.00191248	intergenic	InterCpgi
chr6	34101011	GRM4	100	0	84.3449	3.60499	2.10712e-07	0.001913	utr5	InterCpgi
chr15	82336764	MEX3B	6.66348	1.38296	23.6091	4.5506	2.16262e-07	0.00193307	exon	CpG_Island
chr16	29195768	-	23.7938	3.205	47.9408	3.88186	2.14718e-07	0.00193307	intergenic	north_shore
chr9	125123362	-	22.7359	4.62923	66.3675	4.64752	2.15651e-07	0.00193307	intergenic	InterCpgi
chr9	137367274	-	26.3731	1.8919	49.1136	6.4454	2.15226e-07	0.00193307	intergenic	InterCpgi
chr1	158103482	LOC646268	48.676	3.85806	18.0969	5.0844	2.17568e-07	0.00193726	intergenic	InterCpgi
chr19	8401043	KANK3	13.2054	3.02703	48.9683	10.2313	2.18964e-07	0.00194222	intron	south_shore
chrX	39022104	-	29.6792	4.42759	65.9821	6.41429	2.20061e-07	0.0019445	intergenic	CpG_Island
chr10	71094951	HK1	45.0588	2.33422	63.261	10.8383	2.24635e-07	0.00197178	intron	InterCpgi
chr3	196227861	RNF168	14.4212	2.42168	43.7599	6.91064	2.24851e-07	0.00197178	intron	north_shore
chrX	40974202	USP9X	41.3707	3.80577	88.7363	4.90162	2.29019e-07	0.00200075	utr5	InterCpgi
chr5	133451021	TCF7	0	0	6.80035	2.81613	2.32094e-07	0.00201242	promoter	CpG_Island
chr7	205289	FAM20C	94.2595	1.35432	98.8389	0.505232	2.31459e-07	0.00201242	intron	north_shore
chr17	40192187	-	35.4081	2.89067	58.3439	7.49954	2.36165e-07	0.00203249	intergenic	CpG_Island
chr2	220384842	ACCN4	85.9944	2.87703	100	0	2.3559e-07	0.00203249	intron	north_shelf
chr1	110754763	KCNC4	28.1133	3.67687	57.9582	6.36217	2.39074e-07	0.00204991	exon	CpG_Island
chr17	74003874	EVPL	58.3215	2.59944	33.28	4.39515	2.41367e-07	0.00206194	exon	CpG_Island
chr3	194980400	C3orf21	12.79	3.27605	41.2171	3.27475	2.49502e-07	0.00212359	intron	CpG_Island
chr16	26924858	-	82.2165	3.51603	50.0427	6.55408	2.56879e-07	0.00217042	intergenic	InterCpgi
chr8	114802672	-	33.6297	2.19827	15.9344	3.72625	2.56232e-07	0.00217042	intergenic	InterCpgi
chr16	20605199	-	74.7423	5.51256	91.9837	1.64516	2.60402e-07	0.00218425	intergenic	InterCpgi
chr6	159240390	EZR	0	0	4.51505	1.61586	2.59976e-07	0.00218425	promoter	CpG_Island
chr5	72221508	-	51.1742	6.91154	5.55556	3.92837	2.66723e-07	0.00222919	intergenic	InterCpgi
chr15	99954667	-	96.5014	1.3305	82.718	4.28415	2.7047e-07	0.00225238	intergenic	InterCpgi
chr1	204524375	MDM4	37.6998	5.09646	8.54728	4.32552	2.72732e-07	0.00226307	utr3	InterCpgi
chr19	4099384	MAP2K2	44.1846	5.12406	75.3852	2.92243	2.74137e-07	0.0022666	exon	north_shore
chr2	60778590	BCL11A	2.86401	1.11162	20.0843	4.75901	2.76188e-07	0.00227544	intron	CpG_Island
chr2	23777496	KLHL29	50.7902	2.69589	74.5987	3.81926	2.78123e-07	0.00228325	utr5	InterCpgi
chr11	68830446	TPCN2	75.4337	3.70023	40.4205	6.55118	2.9003e-07	0.00230246	exon	InterCpgi
chr17	20013869	SPECC1	96.7965	1.58305	78.5621	8.2114	2.88593e-07	0.00230246	exon	InterCpgi
chr19	1091489	POLR2E	52.5963	4.06003	17.8479	6.57509	2.83421e-07	0.00230246	intron	north_shore
chr19	2291488	LINGO3	9.895	2.61199	43.3956	7.59741	2.8647e-07	0.00230246	exon	CpG_Island
chr2	636154	-	73.1973	6.24212	100	0	2.90075e-07	0.00230246	intergenic	CpG_Island
chr3	42705916	ZBTB47	23.8363	3.48038	63.6905	7.53707	2.90408e-07	0.00230246	exon	InterCpgi
chr5	504888	SLC9A3	36.637	3.53156	8.8833	1.3378	2.82927e-07	0.00230246	intron	north_shore
chr7	30791030	INMT-FAM188B	2.47046	0.797441	14.7749	1.81717	2.87548e-07	0.00230246	promoter	InterCpgi
chr7	30791030	INMT	2.47046	0.797441	14.7749	1.81717	2.87548e-07	0.00230246	promoter	InterCpgi
chr7	931149	GET4	99.4709	0.529101	84.5238	2.78683	2.8794e-07	0.00230246	intron	CpG_Island
chr7	95025869	PON3	26.8378	2.45151	48.6999	4.56246	2.85723e-07	0.00230246	promoter	CpG_Island
chr1	3150896	PRDM16	61.3949	4.63644	87.9522	4.3898	2.92478e-07	0.00231096	intron	south_shelf
chr10	77159521	NCRNA00245	24.3829	3.40233	57.2917	6.3746	2.95695e-07	0.00231511	exon	CpG_Island
chr10	77159521	ZNF503	24.3829	3.40233	57.2917	6.3746	2.95695e-07	0.00231511	exon	CpG_Island
chr2	239130075	-	24.8918	5.30129	61.1083	5.21924	2.95083e-07	0.00231511	intergenic	InterCpgi
chr5	76932997	OTP	0	0	14.2793	3.64124	2.96004e-07	0.00231511	exon	CpG_Island
chr11	593801	PHRF1	63.5215	4.72993	30.008	6.34157	2.97131e-07	0.00231611	intron	south_shelf
chr3	50230989	GNAT1	31.7623	2.69482	10.0818	4.01739	2.98849e-07	0.00232168	exon	CpG_Island
chr1	24066881	TCEB3	39.3539	2.13418	13.5317	4.77208	3.04979e-07	0.00234573	intergenic	north_shelf
chr16	88384826	-	79.6393	2.20662	97.5	2.5	3.04211e-07	0.00234573	intergenic	InterCpgi
chr18	77155263	NFATC1	1.55234	0.816323	13.4928	4.57949	3.05998e-07	0.00234573	promoter	CpG_Island
chr18	77331091	-	55.6949	1.88044	72.3654	3.29933	3.05543e-07	0.00234573	intergenic	InterCpgi
chr8	61948078	-	40.9844	5.11724	75.1535	3.02671	3.08629e-07	0.00235809	intergenic	InterCpgi
chr16	1800403	MAPK8IP3	89.5232	1.7178	100	0	3.16477e-07	0.0024101	intron	south_shelf
chr8	41507845	NKX6-3	96.7698	0.881438	83.4662	2.82326	3.17839e-07	0.00241253	intergenic	CpG_Island
chr1	15125225	KAZ	3.14425	0.510691	10.0825	4.38927	3.3655e-07	0.00249725	intron	north_shelf
chr12	57523310	LRP1	17.9026	3.58582	52.1603	6.94431	3.33525e-07	0.00249725	intron	south_shore
chr17	35126401	-	55.3973	5.13481	27.6437	1.04531	3.34833e-07	0.00249725	intergenic	InterCpgi
chr2	171830149	-	0	0	12.0066	5.1269	3.34611e-07	0.00249725	intergenic	CpG_Island
chr7	27292322	-	35.6883	3.93102	63.7311	3.86405	3.32107e-07	0.00249725	intergenic	south_shore
chr7	475016	-	20.7808	2.49127	45.2486	4.55325	3.30911e-07	0.00249725	intergenic	north_shelf
chrX	49028197	PLP2	49.8832	4.13153	11.4348	6.61799	3.36427e-07	0.00249725	utr5	CpG_Island
chr1	21648211	ECE1	80.0589	7.11596	11.8939	9.79853	3.42343e-07	0.00253065	intron	InterCpgi
chr4	1161672	SPON2	36.1348	3.24018	64.9045	3.67721	3.43238e-07	0.00253065	intron	CpG_Island
chr7	99104454	ZKSCAN5	80.9939	5.34135	100	0	3.49594e-07	0.00256332	intron	south_shore
chrX	20134298	MAP7D2	51.0204	7.58953	15.6793	1.75379	3.49884e-07	0.00256332	utr5	CpG_Island
chr7	91517193	-	100	0	85.6676	5.98283	3.56132e-07	0.00260086	intergenic	InterCpgi
chr10	71905308	TYSND1	0	0	6.47216	2.29686	3.64338e-07	0.00265243	promoter	CpG_Island
chr6	7920230	MUTED-TXNDC5	61.8817	5.15076	79.6016	4.36039	3.68192e-07	0.00267208	intergenic	InterCpgi
chr10	125792965	CHST15	45.1641	4.25866	73.5348	13.5656	3.72088e-07	0.00268977	intron	InterCpgi
chr19	2757356	SGTA	74.572	3.47058	50.8974	3.59596	3.72953e-07	0.00268977	exon	south_shore
chr16	88700845	IL17C	23.7408	4.4713	55.5432	6.11292	3.75694e-07	0.00270113	intergenic	CpG_Island
chr8	10573804	-	32.1658	5.25648	58.3333	5.15671	3.80441e-07	0.00272679	intergenic	InterCpgi
chr2	133014833	MIR663B	32.2024	2.75967	14.3777	2.95048	3.84525e-07	0.00274755	promoter	CpG_Island
chr2	133014833	ANKRD30BL	32.2024	2.75967	14.3777	2.95048	3.84525e-07	0.00274755	promoter	CpG_Island
chr6	150920518	PLEKHG1	36.4282	2.69968	63.9583	1.64482	3.90507e-07	0.00278171	intergenic	north_shore
chr10	77156022	-	24.2289	3.33726	48.5521	5.49182	3.97004e-07	0.00280256	intergenic	CpG_Island
chr11	3147956	OSBPL5	29.9478	4.14795	64.6629	3.01015	3.97066e-07	0.00280256	intron	InterCpgi
chr18	46547892	-	66.5971	6.20263	100	0	3.96565e-07	0.00280256	intergenic	InterCpgi
chr22	50061114	-	7.60786	1.54828	27.0345	6.48653	4.07665e-07	0.00285129	intergenic	north_shelf
chr3	182897558	MCF2L2	20.3651	5.19729	59.8911	5.78148	4.06559e-07	0.00285129	intron	south_shore
chrX	39949624	BCOR	0	0	13.3507	5.82458	4.07175e-07	0.00285129	utr5	CpG_Island
chr1	148346726	-	5.04035	0.67791	17.4166	3.39519	4.09844e-07	0.0028579	exon	InterCpgi
chr10	70569044	-	23.7076	1.87737	51.8541	4.95134	4.13535e-07	0.00287498	intergenic	InterCpgi
chr17	27156084	C17orf63	23.081	4.87965	0	0	4.16024e-07	0.00288362	utr5	InterCpgi
chr1	151104367	SEMA6C	56.2238	4.7421	87.4434	5.11495	4.20455e-07	0.00290564	utr3	CpG_Island
chr16	88951483	CBFA2T3	51.5508	5.41815	10.3283	4.56233	4.24438e-07	0.00291796	exon	CpG_Island
chr3	37494377	ITGA9	17.1202	2.75027	49.2376	6.05527	4.24759e-07	0.00291796	intron	CpG_Island
chr12	1911818	CACNA2D4	72.9346	3.52096	97.619	2.38095	4.28849e-07	0.00293734	intron	InterCpgi
chr9	140343910	NELF	16.865	2.70222	58.707	11.2127	4.30599e-07	0.00294063	exon	CpG_Island
chr19	47763914	CCDC9	29.4417	5.77499	2.13636	1.23845	4.32467e-07	0.0029447	exon	south_shelf
chr11	63362204	PLA2G16	42.7798	7.47238	77.971	4.43113	4.37893e-07	0.00296552	intron	InterCpgi
chr2	240033299	HDAC4	24.2287	3.62723	55.134	6.19671	4.38087e-07	0.00296552	exon	CpG_Island
chrX	28061141	-	55.6741	5.97569	94.8701	2.99993	4.39993e-07	0.00296974	intergenic	InterCpgi
chr3	126854810	-	43.4538	5.23223	74.2803	3.33246	4.47902e-07	0.00300559	intergenic	CpG_Island
chr8	117543339	-	96.9556	0.936805	82.1932	3.05702	4.46636e-07	0.00300559	intergenic	InterCpgi
chr17	73760723	GALK1	1.24449	0.827362	15.253	3.25884	4.54057e-07	0.00302498	intron	CpG_Island
chr3	5024618	BHLHE40	32.7424	2.28839	9.85417	4.62711	4.52564e-07	0.00302498	exon	north_shore
chr9	139780152	TRAF2	69.251	2.48625	93.0108	4.18181	4.54711e-07	0.00302498	promoter	north_shore
chr17	21496178	-	72.7309	3.53476	43.13	7.65855	4.56227e-07	0.00302637	intergenic	CpG_Island
chr1	22020793	USP48	30.1928	2.51929	49.1276	7.05815	4.58612e-07	0.0030335	intron	InterCpgi
chr12	3103927	TEAD4	83.9118	2.37885	100	0	4.62208e-07	0.00304857	utr5	InterCpgi
chr9	140501305	ARRDC1	26.543	3.6875	67.8434	3.61106	4.71235e-07	0.00309929	intron	south_shore
chr16	70484845	FUK	59.1191	7.79139	3.57143	3.57143	4.77065e-07	0.00311289	intergenic	north_shelf
chr19	8564133	PRAM1	100	0	67.5379	11.4923	4.77277e-07	0.00311289	exon	CpG_Island
chr21	45617272	-	42.181	5.75625	76.8672	3.78496	4.77337e-07	0.00311289	intergenic	InterCpgi
chr5	178837790	-	66.6055	6.31619	42.4075	2.15462	4.83902e-07	0.00314683	intergenic	InterCpgi
chr5	145494397	LARS	53.2649	3.05716	15.0909	6.75089	4.89834e-07	0.00317649	intron	InterCpgi
chr1	14051792	PRDM2	67.7225	5.6968	25.974	7.11506	4.98857e-07	0.00322596	intron	InterCpgi
chr4	6660559	-	5.00998	2.02458	27.9959	6.23617	5.03814e-07	0.00324894	intergenic	CpG_Island
chr2	38160693	FAM82A1	89.9475	1.86282	72.1585	2.79556	5.09393e-07	0.0032758	intron	InterCpgi
chr22	47568600	TBC1D22A	54.7529	4.09621	20.8992	6.10384	5.12864e-07	0.00328899	intron	InterCpgi
chr3	37494177	ITGA9	3.87288	1.54225	18.4557	2.42314	5.24925e-07	0.00334288	intron	CpG_Island
chr8	144787703	-	43.5595	3.01155	75.7167	5.0907	5.25182e-07	0.00334288	intergenic	north_shore
chr9	2718017	KCNV2	25.6384	4.28641	57.9642	5.15345	5.256e-07	0.00334288	exon	CpG_Island
chr4	185089988	ENPP6	33.5902	3.03122	63.627	3.18702	5.28415e-07	0.00335158	intron	CpG_Island
chr19	37286761	-	43.3983	3.02775	75.0458	2.51832	5.32895e-07	0.00337075	intergenic	north_shore
chr9	139024742	-	0	0	6.98446	2.83591	5.34386e-07	0.00337098	intergenic	CpG_Island
chr1	25895027	LDLRAP1	23.7656	2.25095	46.9273	3.27191	5.38193e-07	0.00338576	utr3	InterCpgi
chr1	9525428	-	96.0064	1.54479	79.8027	4.33582	5.41853e-07	0.00339037	intergenic	InterCpgi
chr9	139232213	GPSM1	84.3514	3.31314	44.7917	8.9	5.41251e-07	0.00339037	intron	south_shore
chr8	21906906	EPB49	15.2327	3.89944	55.9709	6.40062	5.45256e-07	0.00340246	intergenic	south_shore
chr10	77159033	ZNF503	47.3326	6.97831	85.9213	7.0591	5.47502e-07	0.00340729	exon	CpG_Island
chr10	77159033	NCRNA00245	47.3326	6.97831	85.9213	7.0591	5.47502e-07	0.00340729	exon	CpG_Island
chr9	138221520	-	83.5218	2.81516	61.2173	3.11353	5.49639e-07	0.00341142	intergenic	InterCpgi
chr19	4099312	MAP2K2	42.375	6.20568	80.0184	3.43594	5.5784e-07	0.00345306	exon	north_shore
chr12	7857790	-	81.9172	3.95889	98.4848	1.51515	5.63351e-07	0.00346863	intergenic	north_shore
chr22	26937040	TPST2	67.8765	4.49128	95.2546	2.31771	5.6193e-07	0.00346863	exon	CpG_Island
chr22	33032288	SYN3	84.0136	3.82661	97.9004	1.23377	5.65584e-07	0.00347314	intron	InterCpgi
chr12	132827626	GALNT9	97.0824	0.787578	85.6891	5.2089	5.72638e-07	0.00350154	intron	CpG_Island
chr16	586923	SOLH	66.1039	3.02088	32.74	9.3075	5.73234e-07	0.00350154	utr5	north_shore
chr5	43620469	NNT	38.9246	6.66424	3.125	3.125	5.7953e-07	0.00353068	intron	InterCpgi
chr4	184454973	-	49.2624	7.28992	90.5258	3.22421	5.85803e-07	0.00355953	intergenic	InterCpgi
chr13	52952726	THSD1	20.1504	4.66159	60.0367	6.26344	5.88216e-07	0.00356185	exon	InterCpgi
chr22	49812340	-	58.7359	3.37255	36.353	7.52231	5.89262e-07	0.00356185	intergenic	CpG_Island
chr20	3712692	HSPA12B	45.6895	3.74303	23.4684	2.54296	5.92069e-07	0.0035695	intergenic	north_shore
chr3	48466729	PLXNB1	30.8215	4.42107	65.9631	5.30033	5.99537e-07	0.00360257	utr5	north_shelf
chr8	638345	ERICH1	0	0	12.0066	5.1269	6.00667e-07	0.00360257	intron	south_shore
chr8	145902128	-	100	0	82.7533	4.31076	6.08594e-07	0.00364069	utr5	InterCpgi
chr11	978241	AP2A2	23.1873	4.3949	61.6263	7.43461	6.105e-07	0.00364267	intron	south_shore
chr20	4900100	SLC23A2	83.2494	2.85976	60.1288	1.92582	6.12726e-07	0.00364656	intron	InterCpgi
chr11	121593791	-	0.680272	0.680272	19.5437	9.2631	6.24614e-07	0.00370109	intergenic	InterCpgi
chr15	70504783	-	26.5769	3.64655	53.3865	5.88479	6.25087e-07	0.00370109	intergenic	InterCpgi
chr7	27162294	HOXA3	84.6043	3.24838	99.1071	0.892857	6.27452e-07	0.00370562	utr5	CpG_Island
chr12	70203946	RAB3IP	59.1511	3.25267	86.2182	3.98686	6.29977e-07	0.00371107	intron	InterCpgi
chr16	83958626	-	80.896	1.75924	55.3274	4.29655	6.31839e-07	0.00371259	intergenic	InterCpgi
chr1	119674246	WARS2	67.7507	6.76754	30.1484	8.42794	6.36606e-07	0.00373113	intron	InterCpgi
chr19	19455694	MAU2	63.9494	1.66891	34.6349	2.74649	6.46075e-07	0.00377706	exon	InterCpgi
chr6	3726179	C6orf145	75.3773	5.41842	100	0	6.48622e-07	0.0037824	intron	InterCpgi
chr11	72975688	P2RY6	10.4018	3.4918	43.75	3.98928	6.53834e-07	0.00380321	utr5	CpG_Island
chr16	4167282	ADCY9	51.3846	5.41828	80.9452	1.6908	6.88446e-07	0.00399451	promoter	south_shore
chr22	29875593	NEFH	27.6548	2.49414	8.39286	3.94283	6.94672e-07	0.00401716	promoter	north_shore
chr5	131831481	-	7.66228	2.61507	28.6337	5.68653	6.9582e-07	0.00401716	intergenic	north_shore
chr21	11169246	-	80.2871	2.59961	51.3907	6.93186	7.02026e-07	0.00403511	intergenic	InterCpgi
chr5	176799138	RGS14	29.3478	4.90114	5.01225	1.70308	7.02416e-07	0.00403511	utr3	InterCpgi
chr10	38609624	-	95.002	1.44513	67.1131	4.91672	7.04189e-07	0.00403529	intergenic	InterCpgi
chr9	139091943	LHX3	31.1014	5.31331	4.36077	2.2968	7.10319e-07	0.00406036	intron	CpG_Island
chr1	17305440	MFAP2	23.5531	3.05085	58.6075	3.71232	7.12221e-07	0.00406121	utr5	north_shore
chr1	26841609	-	83.2724	1.44274	68.3168	4.26278	7.16198e-07	0.00407385	intergenic	InterCpgi
chr10	134357825	INPP5A	74.1299	6.64436	100	0	7.24685e-07	0.00410197	intron	north_shore
chr19	16437762	KLF2	30.2187	4.13259	61.2346	4.3109	7.23671e-07	0.00410197	exon	CpG_Island
chr3	138669285	FOXL2	0	0	5.84236	2.25065	7.44504e-07	0.00420387	exon	CpG_Island
chr3	138669285	C3orf72	0	0	5.84236	2.25065	7.44504e-07	0.00420387	exon	CpG_Island
chr10	121507707	INPP5F	36.1938	1.39971	56.4363	4.33719	7.48787e-07	0.00420753	intron	InterCpgi
chr6	9041096	-	62.6926	7.356	11.5909	8.58738	7.47036e-07	0.00420753	intergenic	InterCpgi
chr6	7051203	-	31.5089	4.13801	60.088	0.702728	7.53195e-07	0.00422206	intergenic	north_shore
chr10	102499484	-	0	0	5.03452	1.76929	7.6933e-07	0.00430208	intron	CpG_Island
chr21	44343148	-	93.8325	1.98272	66.0288	9.19025	7.74237e-07	0.00431909	intergenic	InterCpgi
chr1	68708723	-	100	0	90.987	3.92481	7.76954e-07	0.00432383	intergenic	InterCpgi
chr21	45923387	C21orf29	57.7373	7.14935	7.5	4.78714	7.83706e-07	0.00435095	intron	north_shelf
chr14	104898359	-	37.8384	4.96776	66.3535	2.28109	7.96903e-07	0.0044031	intergenic	south_shore
chr8	145642617	SLC39A4	61.9064	1.52656	40.0134	2.85566	7.96056e-07	0.0044031	promoter	south_shore
chr13	26761255	-	21.468	5.29858	0	0	8.02509e-07	0.00441301	intergenic	south_shore
chr17	37381291	STAC2	3.92565	1.40578	18.0847	6.03667	8.02024e-07	0.00441301	intron	CpG_Island
chr19	33625542	WDR88	9.03793	3.69393	37.2321	1.40471	8.0847e-07	0.00443525	intron	CpG_Island
chr2	54785545	SPTBN1	0	0	20.9586	6.2972	8.10824e-07	0.00443751	utr5	CpG_Island
chr9	66493373	LOC442421	0	0	2.68067	0.975927	8.12716e-07	0.00443751	intergenic	CpG_Island
chr7	77069594	-	63.6519	5.21893	37.6783	6.07482	8.23808e-07	0.00448749	intergenic	InterCpgi
chr1	987253	AGRN	36.6541	3.58493	73.5121	6.93581	8.29966e-07	0.00451042	intron	south_shelf
chr10	15577075	ITGA8	9.6119	2.61493	36.3368	3.6288	8.38349e-07	0.00453469	intron	InterCpgi
chr5	42894333	-	60.5556	1.761	29.6154	6.25681	8.3767e-07	0.00453469	intergenic	InterCpgi
chr14	103622931	-	15.6175	3.14362	0	0	8.46864e-07	0.00456444	intergenic	InterCpgi
chr4	26183827	-	81.8401	2.46782	60.8123	3.43059	8.47793e-07	0.00456444	intergenic	InterCpgi
chr1	21643820	ECE1	18.2001	2.19126	43.9551	4.57891	8.52965e-07	0.0045793	intron	InterCpgi
chr2	223169575	CCDC140	11.6093	2.72405	41.7038	5.94506	8.54508e-07	0.0045793	utr3	south_shore
chr10	120459406	C10orf46	51.6929	10.1156	9.52614	4.70319	8.59897e-07	0.00459634	intron	InterCpgi
chr2	43019670	HAAO	7.30561	2.58325	35.4685	6.56351	8.61659e-07	0.00459634	exon	CpG_Island
chr3	45077617	-	12.3475	2.16145	22.7357	4.35993	8.63817e-07	0.00459726	intergenic	CpG_Island
chr9	139541363	-	35.656	4.24107	74.7391	8.01919	8.68924e-07	0.00461383	intergenic	InterCpgi
chr1	150269629	MRPS21	8.55282	1.27518	20.9164	1.93372	8.74495e-07	0.00463279	intron	south_shelf
chr5	140482226	PCDHB3	25.1991	2.68823	56.5476	11.3512	8.77926e-07	0.00464035	exon	CpG_Island
chr17	40823465	PLEKHH3	80.3786	1.9085	97.6667	2.33333	8.96021e-07	0.0047252	exon	CpG_Island
chr10	88391654	-	60.8592	3.24517	92.9187	5.05114	9.04883e-07	0.00475655	intergenic	north_shore
chr11	68925056	-	13.1331	2.89237	50.4762	9.63428	9.06075e-07	0.00475655	intergenic	south_shore
chr20	62185747	C20orf195	78.4087	4.19164	96.3889	2.37333	9.20461e-07	0.00481712	utr5	south_shore
chr5	134364608	PITX1	37.4822	5.57498	7.75362	4.30961	9.21774e-07	0.00481712	exon	CpG_Island
chr1	6870758	CAMTA1	60.2994	6.50034	18.8462	2.62429	9.25414e-07	0.00481793	intron	InterCpgi
chr5	1058229	SLC12A7	68.8709	6.57558	95.4545	2.62432	9.26091e-07	0.00481793	intron	south_shore
chr10	135051257	VENTX	5.51661	1.31021	0	0	9.30392e-07	0.00482258	promoter	CpG_Island
chr13	90536505	-	22.7713	4.19544	60.9984	3.68774	9.31151e-07	0.00482258	intergenic	InterCpgi
chr8	144403236	TOP1MT	67.4675	1.93829	96.4286	3.57143	9.42007e-07	0.00486791	intron	north_shore
chr1	12080833	MIIP	53.5059	1.6597	69.5813	3.98645	9.45309e-07	0.0048741	utr5	south_shore
chr15	41218371	DLL4	1.19048	1.19048	20.4518	9.30428	9.5782e-07	0.0049167	intergenic	CpG_Island
chr3	13245614	-	57.9275	4.84599	87.8676	5.09967	9.56194e-07	0.0049167	intergenic	north_shore
chr14	104621939	KIF26A	25.9524	5.91057	65.0162	5.53914	9.63833e-07	0.00493662	intron	CpG_Island
chr9	92987431	-	43.3106	3.10547	18.1448	6.52424	9.88929e-07	0.00505398	intergenic	InterCpgi
chr1	71511714	PTGER3	92.7798	1.33448	85.7613	3.62681	1.00589e-06	0.00511808	intron	north_shore
chr20	20392148	RALGAPA2	98.8095	1.19048	70.8333	10.4859	1.00474e-06	0.00511808	intron	InterCpgi
chr19	36435883	LRFN3	80.7105	1.75068	99.0385	0.961538	1.01143e-06	0.00513496	exon	south_shore
chr12	109162668	-	64.4423	4.31068	93.9286	3.61285	1.02448e-06	0.00517853	intergenic	CpG_Island
chr7	855563	SUN1	3.08587	0.9205	11.25	5.26624	1.02328e-06	0.00517853	promoter	CpG_Island
chr7	5252051	WIPI2	24.5699	4.73522	70.239	10.07	1.02705e-06	0.00518017	utr5	InterCpgi
chrX	113371379	-	47.7848	3.95988	84.3585	7.68798	1.03793e-06	0.00522368	intergenic	InterCpgi
chr1	933641	-	84.2654	2.38211	100	0	1.04799e-06	0.00526286	intergenic	CpG_Island
chr11	117668288	DSCAML1	31.4985	3.232	58.3465	7.51791	1.05664e-06	0.00527898	promoter	south_shore
chr19	55591534	EPS8L1	10.3453	2.37221	0	0	1.05404e-06	0.00527898	promoter	CpG_Island
chr6	20321637	-	98.8553	0.73972	90.1478	3.75734	1.05804e-06	0.00527898	intergenic	InterCpgi
chr10	1205770	NCRNA00200	85.5301	4.47769	36.6667	8.40938	1.07464e-06	0.00535028	exon	CpG_Island
chr10	80908313	ZMIZ1	36.4499	7.64585	72.5677	4.34411	1.08763e-06	0.00536146	utr5	InterCpgi
chr1	106338631	-	81.4169	6.56465	29.4444	10.0769	1.08872e-06	0.00536146	intergenic	InterCpgi
chr11	118902063	SLC37A4	56.0913	3.44258	26.2307	7.28536	1.09159e-06	0.00536146	promoter	south_shore
chr13	57019936	-	95.7222	1.70098	72.6786	7.86998	1.09319e-06	0.00536146	intergenic	InterCpgi
chr22	18945923	-	56.9878	3.77618	83.7879	3.72133	1.09541e-06	0.00536146	intergenic	InterCpgi
chr8	11323839	FAM167A	0	0	6.85572	1.92747	1.09029e-06	0.00536146	utr5	CpG_Island
chr8	36567461	-	78.2212	4.52335	98.8636	1.13636	1.08636e-06	0.00536146	intergenic	InterCpgi
chrX	48748552	-	37.3882	4.38126	11.1472	2.70995	1.08395e-06	0.00536146	intergenic	CpG_Island
chr18	32847578	ZSCAN30	0	0	6.47352	2.97056	1.10563e-06	0.00540004	utr5	CpG_Island
chr1	210032282	-	100	0	78.2372	2.55467	1.10825e-06	0.00540146	intergenic	InterCpgi
chr17	75143207	SEC14L1	57.3926	3.76682	90.7242	4.1409	1.13019e-06	0.00547383	intron	InterCpgi
chr21	43982967	SLC37A1	74.62	2.24704	89.5416	0.625938	1.12636e-06	0.00547383	intron	InterCpgi
chr6	119336593	FAM184A	41.1548	5.46081	0	0	1.12904e-06	0.00547383	intron	InterCpgi
chr1	1100063	MIR200B	78.3193	5.04056	100	0	1.13673e-06	0.00549402	intergenic	CpG_Island
chr1	1100063	MIR429	78.3193	5.04056	100	0	1.13673e-06	0.00549402	intergenic	CpG_Island
chr1	1100063	MIR200A	78.3193	5.04056	100	0	1.13673e-06	0.00549402	intergenic	CpG_Island
chr15	101606007	LRRK1	98.0655	0.975809	87.1401	4.67364	1.13914e-06	0.00549418	exon	InterCpgi
chr12	49485929	DHH	0	0	7.90832	2.88902	1.14629e-06	0.00551715	intron	CpG_Island
chr4	13548632	LOC285548	18.9493	1.36777	7.17572	0.955367	1.15048e-06	0.00552586	exon	CpG_Island
chr4	13548632	NKX3-2	18.9493	1.36777	7.17572	0.955367	1.15048e-06	0.00552586	exon	CpG_Island
chr16	67700144	C16orf86	0	0	6.27938	2.21523	1.15656e-06	0.00554355	promoter	CpG_Island
chr16	67700144	C16orf48	0	0	6.27938	2.21523	1.15656e-06	0.00554355	promoter	CpG_Island
chr11	3663162	ART5	26.0522	1.50249	50.8267	8.25399	1.16072e-06	0.00555002	utr5	CpG_Island
chr11	3663162	ART1	26.0522	1.50249	50.8267	8.25399	1.16072e-06	0.00555002	utr5	CpG_Island
chr1	20498547	PLA2G2C	38.1756	3.08643	58.1387	7.06124	1.1627e-06	0.00555002	intron	InterCpgi
chr10	77156391	NCRNA00245	13.5528	2.02393	35.5655	13.2708	1.16787e-06	0.00555177	intergenic	CpG_Island
chr1	40372169	MYCL1	64.2633	2.51885	40.1727	4.49801	1.16685e-06	0.00555177	intergenic	south_shelf
chr1	31144545	-	80.7728	2.45074	98.3333	1.66667	1.18903e-06	0.00564077	intergenic	InterCpgi
chr6	6952907	-	95.7107	1.21603	65.7287	8.76162	1.19172e-06	0.00564197	intergenic	InterCpgi
chr10	116049878	-	33.9705	4.19306	68.6111	4.11074	1.21201e-06	0.00571148	intron	south_shelf
chr12	57632429	NDUFA4L2	8.44064	2.16357	26.5136	2.63761	1.2143e-06	0.00571148	utr5	CpG_Island
chr19	14590237	PTGER1	86.6497	5.09549	31.7857	13.3041	1.21627e-06	0.00571148	exon	north_shore
chr19	14590237	GIPC1	86.6497	5.09549	31.7857	13.3041	1.21627e-06	0.00571148	exon	north_shore
chr2	43905632	PLEKHH2	99.0783	0.921659	81.681	2.75716	1.20913e-06	0.00571148	intron	InterCpgi
chr2	43905632	LOC728819	99.0783	0.921659	81.681	2.75716	1.20913e-06	0.00571148	intron	InterCpgi
chr9	139559989	EGFL7	6.98246	1.05248	15.596	6.26048	1.22656e-06	0.00574814	utr5	CpG_Island
chr6	33245475	B3GALT4	49.655	3.40397	69.4879	2.13574	1.22994e-06	0.00575234	exon	CpG_Island
chr21	9647767	-	65.8232	1.80047	54.5856	6.98385	1.24283e-06	0.00580094	intergenic	north_shore
chr2	235941212	SH3BP4	100	0	77.0833	5.51198	1.2593e-06	0.0058542	utr5	InterCpgi
chr3	185238782	LIPH	59.3737	5.22455	20.0216	7.38552	1.25843e-06	0.0058542	intron	InterCpgi
chr1	246952386	LOC149134	0.793651	0.793651	15.7622	4.39845	1.29618e-06	0.00601354	intergenic	CpG_Island
chr10	34641729	PARD3	100	0	84.8558	5.74749	1.31303e-06	0.00605531	intron	InterCpgi
chr20	60380060	CDH4	21.6959	3.86641	2.5625	1.54911	1.31082e-06	0.00605531	intron	InterCpgi
chr7	100414955	EPHB4	97.2753	1.13767	84.4048	2.37599	1.3095e-06	0.00605531	exon	InterCpgi
chr1	17263214	CROCC	75.5264	2.57595	56.3564	2.88889	1.33361e-06	0.00612584	exon	InterCpgi
chr21	15445868	-	60.0024	3.87006	24.3475	5.38915	1.33169e-06	0.00612584	intergenic	south_shelf
chr9	128927359	-	87.1978	1.98023	98.4954	0.988889	1.34234e-06	0.0061537	intergenic	InterCpgi
chr22	50919564	ADM2	11.8703	1.88779	0.675676	0.675676	1.34856e-06	0.00617003	promoter	CpG_Island
chr19	595934	HCN2	35.8129	5.5995	6.85606	2.31061	1.35928e-06	0.00620681	intron	CpG_Island
chr16	84215028	TAF1C	42.8846	5.42659	11.3293	2.94576	1.37058e-06	0.00624605	utr5	CpG_Island
chr19	38631832	SIPA1L3	30.1684	4.39749	56.6593	3.92579	1.38011e-06	0.00626485	exon	InterCpgi
chr4	22873922	-	92.8917	1.01729	71.5873	3.88119	1.37878e-06	0.00626485	intergenic	InterCpgi
chr2	175193657	-	22.5274	4.05993	57.1071	4.7546	1.38289e-06	0.00626515	intergenic	CpG_Island
chr1	117758355	VTCN1	44.9302	4.75199	73.3851	2.79946	1.38694e-06	0.00627126	intergenic	InterCpgi
chr19	58867925	ZNF497	6.41857	1.71112	24.2002	2.32485	1.39223e-06	0.0062829	exon	CpG_Island
chr19	58867925	A1BG	6.41857	1.71112	24.2002	2.32485	1.39223e-06	0.0062829	exon	CpG_Island
chr1	21978852	RAP1GAP	19.2775	3.40627	46.7006	4.86463	1.40544e-06	0.00633019	promoter	south_shore
chr7	44746215	OGDH	48.6866	5.37215	80.8924	2.55276	1.41386e-06	0.00635574	intron	InterCpgi
chr1	31704619	NKAIN1	85.6667	1.89547	67.665	3.63572	1.42919e-06	0.0064014	intron	InterCpgi
chr7	150813998	AGAP3	93.5791	0.434336	66.2414	6.81482	1.42955e-06	0.0064014	utr5	north_shelf
chr5	170877505	FGF18	42.9506	4.66731	77.7455	5.08339	1.43501e-06	0.00641346	intron	north_shore
chr11	71952440	PHOX2A	46.1301	3.02726	67.7532	9.85269	1.43929e-06	0.00642019	intron	CpG_Island
chr10	11961743	-	98.1602	1.25746	82.5306	2.71324	1.44845e-06	0.00644148	intergenic	InterCpgi
chr17	48762405	ABCC3	61.1903	3.71281	85.0794	8.69111	1.44963e-06	0.00644148	intron	InterCpgi
chrX	132548705	GPC4	50.7692	4.05661	21.9105	5.62657	1.47058e-06	0.00652205	intron	CpG_Island
chr1	94054823	LOC100129046	99.0174	0.636897	86.3222	3.2376	1.48051e-06	0.00655354	exon	InterCpgi
chr1	94054823	BCAR3	99.0174	0.636897	86.3222	3.2376	1.48051e-06	0.00655354	exon	InterCpgi
chr15	52248473	LEO1	45.5254	4.24494	16.0038	2.57597	1.50438e-06	0.00662123	intron	InterCpgi
chr16	66911680	PDP2	60.6215	5.58611	87.9738	4.54288	1.50055e-06	0.00662123	intergenic	north_shelf
chr5	51137	-	68.0324	4.66961	30.9722	10.3398	1.50384e-06	0.00662123	intergenic	CpG_Island
chr2	172293508	DCAF17	100	0	93.8253	2.32472	1.51669e-06	0.00666274	intron	south_shelf
chr2	172293508	METTL8	100	0	93.8253	2.32472	1.51669e-06	0.00666274	intron	south_shelf
chr10	115805676	ADRB1	26.7592	2.26859	44.5468	2.04966	1.52526e-06	0.00668145	utr3	south_shore
chr1	46798310	-	93.9971	1.33026	82.5126	2.18348	1.52672e-06	0.00668145	intergenic	InterCpgi
chr1	148596924	-	43.1321	1.68387	55.472	4.72355	1.54717e-06	0.00669502	intergenic	north_shore
chr11	68079847	LRP5	0	0	12.3214	5.17857	1.53602e-06	0.00669502	promoter	north_shore
chr16	743495	FBXL16	5.18213	1.63846	23.001	2.94537	1.54355e-06	0.00669502	utr3	CpG_Island
chr16	743495	WDR24	5.18213	1.63846	23.001	2.94537	1.54355e-06	0.00669502	utr3	CpG_Island
chr17	55102	-	1.56486	0.750604	18.75	9.01067	1.53743e-06	0.00669502	intergenic	north_shore
chr2	96774480	-	35.9637	3.19942	66.4583	1.53565	1.54518e-06	0.00669502	intergenic	InterCpgi
chr7	157478800	PTPRN2	9.5027	1.8792	0	0	1.54517e-06	0.00669502	intron	CpG_Island
chr1	92410520	BRDT	15.7027	1.94225	29.8642	2.44303	1.56536e-06	0.00676108	intergenic	InterCpgi
chr1	59226036	-	53.6844	6.22094	71.4686	4.76086	1.56913e-06	0.00676475	intergenic	InterCpgi
chr1	11694686	-	48.2039	3.13768	32.7894	3.08355	1.58802e-06	0.00676734	intergenic	InterCpgi
chr1	36577850	-	95.3627	2.23803	61.4985	7.29007	1.59681e-06	0.00676734	utr5	InterCpgi
chr13	81915134	-	98.2072	0.85927	85.5419	2.82164	1.58409e-06	0.00676734	intergenic	InterCpgi
chr15	41787804	ITPKA	30.6763	3.32349	65.1861	6.93243	1.59465e-06	0.00676734	intron	CpG_Island
chr15	79092659	ADAMTS7	76.5001	4.3669	98.8095	1.19048	1.57722e-06	0.00676734	exon	CpG_Island
chr16	88962746	CBFA2T3	85.9269	3.3803	100	0	1.57521e-06	0.00676734	intron	CpG_Island
chr16	90072563	DBNDD1	89.5079	3.20845	57.0395	7.63715	1.58436e-06	0.00676734	utr3	south_shore
chr17	1957121	MIR212	15.4925	1.52011	37.221	4.80592	1.5801e-06	0.00676734	intergenic	CpG_Island
chr17	1957121	HIC1	15.4925	1.52011	37.221	4.80592	1.5801e-06	0.00676734	intergenic	CpG_Island
chr17	1957121	MIR132	15.4925	1.52011	37.221	4.80592	1.5801e-06	0.00676734	intergenic	CpG_Island
chr3	158450441	RARRES1	0	0	17.959	5.4274	1.59897e-06	0.00676734	promoter	CpG_Island
chrX	47930909	ZNF630	18.1494	1.16643	32.8608	6.3084	1.5985e-06	0.00676734	promoter	CpG_Island
chr9	127248534	NR5A1	46.6509	4.15079	28.3173	3.76957	1.61151e-06	0.00680798	intron	north_shore
chr16	61937494	CDH8	93.6849	1.0049	70.3544	8.78075	1.61616e-06	0.00681519	intron	InterCpgi
chr1	6171669	CHD5	85.0648	1.65095	65.4157	3.7839	1.62153e-06	0.00682542	intron	InterCpgi
chr11	119896762	-	100	0	82.0833	3.81123	1.65308e-06	0.00694559	intergenic	InterCpgi
chr13	112870577	-	37.74	0.745273	18.8248	2.31727	1.68929e-06	0.00706324	intergenic	InterCpgi
chr19	370767	THEG	92.4258	1.97928	71.322	4.0126	1.69023e-06	0.00706324	intron	InterCpgi
chr4	111213507	-	43.4466	4.30141	14.4114	2.9684	1.68608e-06	0.00706324	intergenic	InterCpgi
chr6	117869150	DCBLD1	23.5168	3.81613	1.08696	1.08696	1.69544e-06	0.00707221	intron	CpG_Island
chr19	48824452	CCDC114	52.6748	3.92194	85.0318	6.87606	1.7088e-06	0.00711513	promoter	north_shore
chr19	48824452	EMP3	52.6748	3.92194	85.0318	6.87606	1.7088e-06	0.00711513	promoter	north_shore
chr1	232585120	SIPA1L2	66.5989	3.60355	91.0599	1.87442	1.71865e-06	0.00713138	intron	InterCpgi
chr14	73518914	-	98.6147	0.978266	90.054	1.10476	1.71954e-06	0.00713138	intergenic	InterCpgi
chr2	131797457	ARHGEF4	5.55213	2.63725	24.1995	1.33527	1.72194e-06	0.00713138	intron	CpG_Island
chr12	26472606	-	23.1021	2.82352	54.1071	7.22477	1.72908e-06	0.00714815	intergenic	InterCpgi
chr10	135083820	ADAM8	56.4971	3.75511	29.1351	5.61061	1.73396e-06	0.00715554	intron	CpG_Island
chr19	51205841	SHANK1	59.8659	5.89031	87.5791	2.90735	1.74283e-06	0.00716659	exon	InterCpgi
chr21	47580884	-	53.8376	7.03881	93.2692	2.55444	1.74058e-06	0.00716659	intergenic	CpG_Island
chr11	119191923	MCAM	4.29617	1.34383	20.8454	5.05872	1.74808e-06	0.00717545	intergenic	CpG_Island
chr10	88729345	C10orf116	22.8525	3.68508	46.2185	15.7719	1.76351e-06	0.0071931	intron	south_shore
chr10	88729345	AGAP11	22.8525	3.68508	46.2185	15.7719	1.76351e-06	0.0071931	intron	south_shore
chr11	1846610	-	25.6786	2.68632	52.2319	3.7824	1.7639e-06	0.0071931	intergenic	north_shore
chr22	20162665	-	55.4271	4.16648	84.0144	7.29486	1.7597e-06	0.0071931	intergenic	InterCpgi
chr3	134089805	AMOTL2	33.8633	4.48233	65.2841	3.32649	1.76481e-06	0.0071931	exon	north_shelf
chr3	37494310	ITGA9	10.5551	2.16094	39.2595	7.41034	1.77129e-06	0.00720684	intron	CpG_Island
chr12	132639301	-	32.2683	3.05294	11.1022	2.56834	1.79132e-06	0.00722482	intergenic	south_shore
chr17	48206377	SAMD14	25.5439	3.41676	61.79	9.78675	1.78843e-06	0.00722482	utr5	north_shore
chr20	555351	-	65.7853	3.8349	80.3122	3.9216	1.79049e-06	0.00722482	intergenic	InterCpgi
chr2	239408960	-	74.1497	3.15596	43.2529	6.02367	1.78018e-06	0.00722482	intergenic	InterCpgi
chr4	10034960	SLC2A9	17.7323	3.3162	51.6696	6.98516	1.78218e-06	0.00722482	utr5	InterCpgi
chr1	21684955	-	49.7262	0.763418	63.7612	5.5443	1.80477e-06	0.00725131	intergenic	InterCpgi
chr13	41373254	SUGT1P3	91.163	3.68895	51.6667	8.76652	1.80471e-06	0.00725131	exon	InterCpgi
chr13	41373254	SLC25A15	91.163	3.68895	51.6667	8.76652	1.80471e-06	0.00725131	exon	InterCpgi
chr20	62058737	KCNQ2	69.5468	7.61173	40.2273	4.0888	1.80728e-06	0.00725131	intron	north_shore
chr15	99194617	IGF1R	34.1487	3.94958	60.0654	6.54495	1.81139e-06	0.00725521	promoter	south_shore
chr21	44593579	-	13.3067	2.59038	0.684932	0.684932	1.81813e-06	0.00726966	intergenic	CpG_Island
chr1	25324996	-	93.7827	1.33786	77.9058	1.0465	1.82347e-06	0.00727185	intergenic	InterCpgi
chr1	2980908	PRDM16	55.9047	3.72596	84.6225	3.79575	1.82983e-06	0.00727185	intergenic	south_shore
chr1	2980908	FLJ42875	55.9047	3.72596	84.6225	3.79575	1.82983e-06	0.00727185	intergenic	south_shore
chr19	18919021	-	30.9206	3.30577	59.9154	3.23836	1.83125e-06	0.00727185	intergenic	InterCpgi
chr2	3496822	-	61.6841	3.18251	82.1647	3.20753	1.83011e-06	0.00727185	intergenic	InterCpgi
chr16	90085299	DBNDD1	1.44029	0.680452	17.9293	4.44076	1.84024e-06	0.00727305	utr5	CpG_Island
chr16	90085299	GAS8	1.44029	0.680452	17.9293	4.44076	1.84024e-06	0.00727305	utr5	CpG_Island
chr20	17417539	PCSK2	60.6695	8.61794	14.7096	4.26358	1.84097e-06	0.00727305	intron	InterCpgi
chr9	115161273	HSDL2	100	0	82.7134	6.67313	1.84061e-06	0.00727305	intron	InterCpgi
chr2	27531338	UCN	42.2118	3.99531	68.8639	2.0283	1.84485e-06	0.00727593	promoter	CpG_Island
chr14	34854507	-	43.0297	8.76704	0	0	1.88453e-06	0.00738216	intergenic	InterCpgi
chr16	2092442	NTHL1	34.7986	6.78659	3.05556	1.77865	1.87948e-06	0.00738216	intron	south_shelf
chr17	33522441	AMAC1	0	0	27.7665	7.84183	1.8782e-06	0.00738216	promoter	InterCpgi
chr20	60377811	CDH4	32.8668	3.10932	14.511	1.67652	1.88156e-06	0.00738216	intron	InterCpgi
chr12	7792718	-	44.0727	4.53495	12.8555	2.41754	1.88936e-06	0.00738483	intergenic	InterCpgi
chr7	962714	ADAP1	72.5934	2.72312	90.8531	3.63842	1.8916e-06	0.00738483	intron	south_shelf
chr3	50553567	-	18.8131	4.34854	48.3894	2.46892	1.8972e-06	0.00739422	intergenic	InterCpgi
chr2	175193744	-	51.8838	5.71856	89.0485	4.28366	1.90362e-06	0.00740677	intergenic	CpG_Island
chr16	84228583	ADAD2	89.5743	3.66471	53.7698	5.02341	1.92158e-06	0.00743491	exon	south_shelf
chr19	1779755	-	22.3357	3.06093	46.1594	3.26248	1.92089e-06	0.00743491	intergenic	south_shelf
chr6	31079577	C6orf15	97.1797	1.14305	81.2771	4.85327	1.91485e-06	0.00743491	exon	InterCpgi
chr6	31079577	PSORS1C1	97.1797	1.14305	81.2771	4.85327	1.91485e-06	0.00743491	exon	InterCpgi
chr9	18315604	-	36.9916	4.34032	9.35897	4.88022	1.9237e-06	0.00743491	intergenic	InterCpgi
chr19	3673833	PIP5K1C	50.238	4.00985	86.147	2.30229	1.934e-06	0.00744607	intron	south_shore
chr20	55965170	RBM38	4.28079	1.95137	26.725	5.41318	1.93233e-06	0.00744607	promoter	CpG_Island
chr4	16860248	LDB2	65.7398	4.82197	93.8862	2.36519	1.93623e-06	0.00744607	intron	InterCpgi
chr17	8060956	-	90.0914	3.532	52.5864	7.72294	1.96191e-06	0.00751986	intergenic	south_shore
chr22	40801264	SGSM3	98.2517	1.17957	73.6111	2.40563	1.96184e-06	0.00751986	exon	InterCpgi
chr7	421457	LOC442497	21.4483	2.10958	40.8185	6.45905	1.96875e-06	0.0075336	exon	south_shore
chr17	19613974	SLC47A2	29.2947	2.50826	56.693	2.86047	1.98241e-06	0.00757335	intron	north_shelf
chr16	54481839	-	50.7104	4.96128	76.7233	6.8419	1.9918e-06	0.00759344	intergenic	InterCpgi
chr7	149471960	ZNF467	11.2615	1.72632	38.7728	10.4927	1.99423e-06	0.00759344	promoter	south_shore
chr7	149471960	SSPO	11.2615	1.72632	38.7728	10.4927	1.99423e-06	0.00759344	promoter	south_shore
chr8	131455293	-	5.47127	2.27592	28.4596	2.22581	2.02817e-06	0.00771	utr5	CpG_Island
chr9	139814980	TRAF2	75.0864	1.42759	53.0935	3.77535	2.04962e-06	0.00777877	intron	InterCpgi
chr7	152530994	ACTR3B	83.1523	1.92695	94.5089	2.06374	2.06628e-06	0.00782915	intron	InterCpgi
chr1	237809326	RYR2	26.604	3.20711	6.91907	2.96721	2.07312e-06	0.00784223	intron	InterCpgi
chr14	99860445	-	86.0008	2.71129	100	0	2.09034e-06	0.00787862	intergenic	InterCpgi
chr16	29346733	RUNDC2C	100	0	83.4164	2.99457	2.08759e-06	0.00787862	intergenic	InterCpgi
chr9	140166981	COBRA1	95.9624	1.36468	79.0769	4.93158	2.09421e-06	0.00787862	exon	north_shore
chrX	129066799	-	22.106	3.89166	46.3319	4.49241	2.09635e-06	0.00787862	intergenic	CpG_Island
chr13	88327926	LOC642345	73.9505	2.67971	91.8959	2.02725	2.1055e-06	0.00790018	exon	south_shore
chr13	88327926	SLITRK5	73.9505	2.67971	91.8959	2.02725	2.1055e-06	0.00790018	exon	south_shore
chr11	830308	CD151	2.79429	1.04887	18.9569	5.39763	2.12144e-06	0.00792865	exon	CpG_Island
chr11	830308	EFCAB4A	2.79429	1.04887	18.9569	5.39763	2.12144e-06	0.00792865	exon	CpG_Island
chr4	132300536	-	100	0	83.5206	4.71331	2.12336e-06	0.00792865	intergenic	InterCpgi
chr7	27284671	EVX1	6.07903	1.54424	32.8508	3.90827	2.12199e-06	0.00792865	utr5	CpG_Island
chr22	19969014	ARVCF	79.5665	3.03198	39.7494	8.4649	2.14259e-06	0.00798757	exon	south_shore
chr21	43689840	ABCG1	62.1313	3.88852	85.9829	3.07918	2.17012e-06	0.00806284	intron	InterCpgi
chr3	128211747	GATA2	4.51453	2.55734	31.8806	6.63422	2.16979e-06	0.00806284	utr5	CpG_Island
chr8	145106673	OPLAH	32.9501	7.16456	68.0515	2.80016	2.17323e-06	0.00806284	exon	CpG_Island
chr1	6079971	KCNAB2	46.4362	2.88764	23.4896	3.71643	2.18531e-06	0.00809466	utr5	InterCpgi
chr21	48069271	PRMT2	61.2892	3.65416	23.8346	5.58976	2.19837e-06	0.00813004	intron	south_shore
chr12	1414182	ERC1	14.8253	0.89476	37.5633	7.67551	2.2189e-06	0.00814095	intron	InterCpgi
chr17	59529169	TBX4	14.5727	3.01469	40.9311	2.69278	2.21886e-06	0.00814095	intergenic	CpG_Island
chr17	79073095	BAIAP2	98.4127	1.5873	80.6331	2.22403	2.21633e-06	0.00814095	intron	InterCpgi
chr2	33581513	LTBP1	65.6825	3.00688	90.7675	5.44818	2.21748e-06	0.00814095	intron	InterCpgi
chr9	79002686	RFK	100	0	92.7475	2.71745	2.21174e-06	0.00814095	intron	InterCpgi
chr1	40157965	HPCAL4	0	0	7.01715	1.50741	2.23023e-06	0.00816957	promoter	CpG_Island
chr1	32226307	MIR4254	16.131	2.09341	42.1627	10.1642	2.24297e-06	0.00818301	promoter	CpG_Island
chr1	32226307	BAI2	16.131	2.09341	42.1627	10.1642	2.24297e-06	0.00818301	promoter	CpG_Island
chr20	62186195	C20orf195	19.915	1.98833	40.5691	5.7377	2.24141e-06	0.00818301	utr5	south_shore
chr8	142337239	-	40.5102	3.71696	63.9055	3.73022	2.2445e-06	0.00818301	intergenic	InterCpgi
chr2	233387535	CHRND	36.0279	6.30534	76.0417	6.71844	2.25981e-06	0.00822585	exon	CpG_Island
chr2	233387535	LOC646960	36.0279	6.30534	76.0417	6.71844	2.25981e-06	0.00822585	exon	CpG_Island
chr5	13331719	-	38.9084	3.91532	6.30303	5.05834	2.27696e-06	0.00827528	intergenic	InterCpgi
chr3	83819293	-	87.0062	3.14463	100	0	2.2892e-06	0.00830673	intergenic	InterCpgi
chr12	21241485	LST-3TM12	89.3581	2.14539	100	0	2.31295e-06	0.00837978	intron	InterCpgi
chr20	43379362	KCNK15	13.9454	4.00463	0	0	2.3411e-06	0.00845529	exon	CpG_Island
chr7	153326903	-	34.1336	3.1968	61.1826	3.53641	2.34036e-06	0.00845529	intergenic	InterCpgi
chr7	123834770	-	83.3098	2.76873	94.8572	2.00145	2.36064e-06	0.00851258	intergenic	InterCpgi
chr1	192956190	-	97.1429	1.34687	75.1603	6.04388	2.37821e-06	0.00856261	intergenic	InterCpgi
chr13	114545666	GAS6	54.4088	5.08366	73.0981	5.49269	2.39201e-06	0.00859893	exon	north_shore
chr17	56565315	HSF5	71.4726	5.12144	93.8622	3.27053	2.40135e-06	0.00861911	exon	CpG_Island
chr12	52627154	KRT7	10.3808	1.44317	29.7403	4.21507	2.4224e-06	0.00862779	exon	CpG_Island
chr3	82274404	-	96.5533	1.3305	77.4328	10.7661	2.41216e-06	0.00862779	intergenic	InterCpgi
chr7	322695	-	87.3124	3.38992	100	0	2.42043e-06	0.00862779	intergenic	InterCpgi
chr8	53013021	-	14.5589	3.51646	0	0	2.42031e-06	0.00862779	intergenic	InterCpgi
chr9	116918994	COL27A1	7.59565	1.95214	23.3842	3.55301	2.41857e-06	0.00862779	intron	south_shore
chr20	3063932	AVP	21.9523	3.97939	48.1692	5.66672	2.42891e-06	0.00863769	intron	CpG_Island
chr1	17265694	CROCC	65.5239	3.36666	35.4958	6.17488	2.44009e-06	0.00866413	intron	InterCpgi
chr20	592585	TCF15	59.0816	6.97943	88.645	4.25128	2.4469e-06	0.00867501	promoter	south_shore
chr12	57634856	NDUFA4L2	8.84067	1.16008	23.692	5.28661	2.46097e-06	0.00867676	promoter	south_shore
chr1	6171680	CHD5	81.8812	2.28688	58.8126	6.45402	2.45538e-06	0.00867676	intron	InterCpgi
chr9	139249049	GPSM1	52.5155	7.16019	92.1601	2.74835	2.46239e-06	0.00867676	promoter	InterCpgi
chrX	48690301	PCSK1N	34.0291	3.22658	12.8268	3.62712	2.45569e-06	0.00867676	exon	CpG_Island
chr1	224388099	-	31.1348	3.12466	9.20084	3.6756	2.47032e-06	0.00869149	intergenic	InterCpgi
chr2	238354825	-	77.1112	1.87557	97.247	1.6182	2.48593e-06	0.00872634	intergenic	InterCpgi
chr4	186910102	-	48.0026	4.03246	19.3981	7.47094	2.49154e-06	0.00872634	intergenic	InterCpgi
chr6	85477632	TBX18	36.8517	4.02836	64.3056	2.24954	2.49147e-06	0.00872634	intergenic	south_shelf
chr2	43938759	PLEKHH2	91.373	3.5247	40.1393	14.337	2.49584e-06	0.00872807	intron	InterCpgi
chr7	48129930	UPP1	31.3764	2.68863	53.9417	2.27812	2.49957e-06	0.00872807	utr5	CpG_Island
chr3	73005918	GXYLT2	62.0395	3.76478	40.3469	5.17253	2.53298e-06	0.00883143	intron	InterCpgi
chr7	44605097	-	84.9821	4.39036	49.5	7.08872	2.54335e-06	0.00885425	utr3	InterCpgi
chr17	45849423	-	61.7167	4.44378	89.2422	4.59964	2.55043e-06	0.00886555	intergenic	InterCpgi
chr2	114737460	LOC100499194	67.6823	4.7828	34.3182	5.53445	2.55957e-06	0.00888397	exon	CpG_Island
chr2	114737460	LOC440900	67.6823	4.7828	34.3182	5.53445	2.55957e-06	0.00888397	exon	CpG_Island
chr19	4099406	MAP2K2	54.1849	4.07769	80.9174	4.01482	2.57627e-06	0.00892857	exon	north_shore
chr10	102900180	-	17.1907	3.28682	0	0	2.59652e-06	0.00897187	intergenic	CpG_Island
chr3	126113886	CCDC37	0	0	14.7076	2.56894	2.59616e-06	0.00897187	promoter	CpG_Island
chr1	9924685	CTNNBIP1	55.814	3.0638	79.0489	2.70947	2.60508e-06	0.00898804	intron	InterCpgi
chr1	234403948	SLC35F3	0.921815	0.467234	11.6378	3.56641	2.61286e-06	0.00898808	intron	InterCpgi
chr1	86514424	COL24A1	49.9066	3.65123	69.3237	2.91558	2.61042e-06	0.00898808	intron	InterCpgi
chr16	2144243	PKD1	36.2042	3.43317	62.9899	5.07649	2.64762e-06	0.00908067	intron	south_shelf
chr16	2144243	MIR1225	36.2042	3.43317	62.9899	5.07649	2.64762e-06	0.00908067	intron	south_shelf
chr5	115697254	-	42.2813	4.21002	73.2315	6.49146	2.64419e-06	0.00908067	intergenic	CpG_Island
chr1	156425799	-	77.5386	4.90874	47.1429	4.40557	2.6609e-06	0.0091121	intergenic	north_shore
chr17	79393683	BAHCC1	9.37853	1.82261	28.1827	4.95829	2.66465e-06	0.0091121	intron	CpG_Island
chr16	1143558	C1QTNF8	21.7793	2.51452	51.1488	7.43309	2.67372e-06	0.00912964	exon	CpG_Island
chr2	71974337	-	4.5027	1.49185	28.3378	9.68689	2.72173e-06	0.00925938	intergenic	InterCpgi
chr8	116343079	-	80.7068	3.27693	39.4231	13.0259	2.72372e-06	0.00925938	intergenic	InterCpgi
chrX	149589682	MAMLD1	25.7338	2.65693	44.7424	5.20686	2.71628e-06	0.00925938	utr5	InterCpgi
chr16	67198826	HSF4	3.03129	0.97715	20.0916	8.45926	2.75982e-06	0.00935462	exon	CpG_Island
chr7	25892070	-	19.8057	2.70604	48.0952	6.87597	2.75712e-06	0.00935462	intergenic	CpG_Island
chr10	6261011	PFKFB3	35.9282	3.52356	67.4679	6.21007	2.77157e-06	0.00937043	intron	north_shore
chr1	46004543	-	90.1326	2.62478	66.6635	4.16962	2.77258e-06	0.00937043	intergenic	InterCpgi
chr5	154173565	LARP1	80.1613	5.59058	100	0	2.78076e-06	0.00938438	intron	InterCpgi
chr19	8765005	-	53.6209	4.66096	77.2526	0.559372	2.79912e-06	0.00941889	intergenic	InterCpgi
chrX	116528702	-	99.3789	0.621118	86.8236	2.37125	2.79762e-06	0.00941889	intergenic	InterCpgi
chr8	57017422	-	63.2375	6.06621	25.6782	4.24403	2.80947e-06	0.00944	intergenic	InterCpgi
chr1	23908368	-	74.858	5.24247	50.5651	2.87445	2.82062e-06	0.00944409	intergenic	InterCpgi
chr1	62390764	INADL	47.6955	3.16684	30.528	3.11543	2.82235e-06	0.00944409	intron	InterCpgi
chr6	150932686	PLEKHG1	100	0	87.8662	4.7593	2.82701e-06	0.00944409	utr5	InterCpgi
chr7	131158802	MKLN1	100	0	89.2619	5.00572	2.82342e-06	0.00944409	intron	InterCpgi
chr7	2315400	SNX8	91.5094	3.64264	62.3545	8.16124	2.83282e-06	0.00944986	intron	north_shelf
chr7	2039442	MAD1L1	84.4542	1.89467	100	0	2.83808e-06	0.0094538	intron	InterCpgi
chr17	48206343	SAMD14	20.0985	4.55176	56.2322	3.30191	2.84293e-06	0.00945634	utr5	north_shore
chrX	51778445	-	36.3018	3.19514	57.7424	3.34931	2.85204e-06	0.00947303	intergenic	InterCpgi
chr19	34702080	LSM14A	100	0	89.916	3.41346	2.8627e-06	0.00949484	intron	InterCpgi
chr16	90085341	GAS8	0	0	4.09455	1.39342	2.89831e-06	0.00958605	utr5	CpG_Island
chr16	90085341	DBNDD1	0	0	4.09455	1.39342	2.89831e-06	0.00958605	utr5	CpG_Island
chr17	17625911	RAI1	49.0201	4.86548	73.6758	6.89317	2.89849e-06	0.00958605	utr5	CpG_Island
chr1	85576058	WDR63	1.02564	0.664409	14.29	2.50728	2.91174e-06	0.00961614	intron	InterCpgi
chr17	30603693	RHBDL3	69.0716	4.8029	93.4474	2.38235	2.93729e-06	0.00963831	intron	InterCpgi
chr19	1516308	ADAMTSL5	75.341	4.55344	99.1667	0.833333	2.93737e-06	0.00963831	intergenic	south_shelf
chr2	218669280	TNS1	80.7466	3.33758	97.334	1.35897	2.93927e-06	0.00963831	exon	InterCpgi
chr7	76137865	UPK3B	79.1016	4.38717	98.6842	1.31579	2.92283e-06	0.00963831	intergenic	InterCpgi
chrX	23801244	SAT1	11.3476	1.43649	27.2216	4.67263	2.93379e-06	0.00963831	promoter	CpG_Island
chr22	20268612	-	68.5396	5.00155	20.8333	12.5	2.94542e-06	0.00964481	intergenic	InterCpgi
chr12	51670906	-	97.8061	1.7642	83.3974	5.90799	2.95875e-06	0.0096689	intergenic	InterCpgi
chr6	94176020	-	96.106	2.44891	62.7083	10.3267	2.96112e-06	0.0096689	intergenic	InterCpgi
chr1	1024390	C1orf159	52.1739	2.53118	23.7278	9.14914	2.97725e-06	0.00967424	intron	CpG_Island
chr14	74057511	ACOT4	100	0	92.3701	2.95645	2.97188e-06	0.00967424	promoter	north_shore
chr7	1283915	-	26.6432	3.75513	55.2381	4.13765	2.97355e-06	0.00967424	intergenic	CpG_Island
chrX	67718913	YIPF6	17.2188	2.12994	37.8485	5.0154	2.97948e-06	0.00967424	exon	CpG_Island
chr12	133126623	FBRSL1	17.1508	3.40275	56.0714	8.88561	2.98598e-06	0.00968177	intron	south_shore
chr3	147137456	-	47.614	2.56981	70.1557	3.24703	2.99422e-06	0.00969491	intergenic	south_shore
chr2	132035381	LOC440910	54.1681	8.77272	92.6709	2.67981	3.00951e-06	0.00973083	intergenic	InterCpgi
chr10	126305364	-	99.0312	0.625484	77.9315	8.07103	3.01467e-06	0.00973391	intergenic	south_shore
chr17	79772457	-	97.3138	1.77361	74.9188	6.32544	3.03535e-06	0.00977342	intergenic	CpG_Island
chr5	1223268	SLC6A19	49.993	4.70609	25.3172	1.82679	3.03394e-06	0.00977342	utr3	north_shelf
chr5	1223268	SLC6A18	49.993	4.70609	25.3172	1.82679	3.03394e-06	0.00977342	utr3	north_shelf
chr1	236332161	GPR137B	11.4123	2.07296	34.6296	7.40509	3.06048e-06	0.00984066	intron	InterCpgi
chr19	1630016	TCF3	83.2209	2.88302	52.6316	7.054	3.07595e-06	0.0098408	intron	north_shore
chr20	42744594	JPH2	50.5819	2.69988	76.9776	4.6963	3.07843e-06	0.0098408	exon	CpG_Island
chr2	133014848	ANKRD30BL	50.3167	4.5402	24.0716	4.21045	3.08603e-06	0.0098408	promoter	CpG_Island
chr2	133014848	MIR663B	50.3167	4.5402	24.0716	4.21045	3.08603e-06	0.0098408	promoter	CpG_Island
chr3	50231021	GNAT1	20.0572	2.38053	8.92094	4.75427	3.08e-06	0.0098408	exon	CpG_Island
chr7	1856903	MAD1L1	21.6577	3.16937	55.7608	7.45451	3.08353e-06	0.0098408	intron	InterCpgi
chr7	74482982	WBSCR16	98.9011	1.0989	76.1905	2.52538	3.07649e-06	0.0098408	intron	InterCpgi
chr12	122613723	MLXIP	87.0942	1.32856	96.4806	2.24346	3.09031e-06	0.00984089	exon	InterCpgi
chr19	5017048	KDM4B	44.8344	5.02586	15.1434	5.71724	3.11468e-06	0.00990488	utr5	InterCpgi
chr16	16642490	-	100	0	91.432	3.20701	3.12899e-06	0.0099258	intergenic	InterCpgi
chr16	70406862	DDX19A	98.0952	1.28218	75.2273	9.78681	3.12984e-06	0.0099258	utr3	InterCpgi
chr14	99641477	BCL11B	76.2288	2.82022	96.4179	2.30866	3.14025e-06	0.00993243	exon	CpG_Island
chr19	8401190	KANK3	31.5165	4.11298	61.384	6.09636	3.14051e-06	0.00993243	intron	south_shore
chr17	73914035	FBF1	53.9428	4.14288	24.4419	5.82242	3.15884e-06	0.0099632	exon	CpG_Island
chr18	8707193	-	21.7838	3.04556	48.8273	4.88898	3.15469e-06	0.0099632	exon	CpG_Island
chr2	239721062	-	96.0472	1.61121	73.431	6.8394	3.16838e-06	0.00997969	intergenic	InterCpgi
chr1	176366308	-	91.0828	3.24973	61.2714	8.13706	3.20597e-06	0.0100434	intergenic	InterCpgi
chr20	3713429	HSPA12B	1.0989	0.709338	10.8077	1.61434	3.19902e-06	0.0100434	utr5	CpG_Island
chr6	150437138	-	100	0	88.0556	4.38326	3.20222e-06	0.0100434	intergenic	InterCpgi
chrX	11682501	ARHGAP6	39.9023	5.03219	66.5373	6.93316	3.20142e-06	0.0100434	exon	CpG_Island
chr10	100027926	LOXL4	0	0	13.0252	4.85774	3.22975e-06	0.0100563	utr5	north_shore
chr14	77605739	ZDHHC22	27.2187	3.58189	11.5456	2.8287	3.24327e-06	0.0100563	exon	north_shore
chr19	1995776	BTBD2	93.3645	2.24866	78.422	3.88657	3.21686e-06	0.0100563	intron	south_shelf
chr19	4716019	DPP9	72.9112	4.4776	33.1818	9.15508	3.23448e-06	0.0100563	intron	InterCpgi
chr2	101810314	-	78.5841	2.45194	49.5875	6.78704	3.24919e-06	0.0100563	intergenic	InterCpgi
chr21	44767804	-	34.9601	3.89189	68.0794	4.19363	3.23907e-06	0.0100563	intergenic	InterCpgi
chr22	39930862	RPS19BP1	0	0	9.21474	3.57717	3.24576e-06	0.0100563	intergenic	CpG_Island
chr8	143719868	-	62.806	3.41812	83.9928	2.84536	3.23475e-06	0.0100563	intergenic	InterCpgi
chr8	22043506	BMP1	92.8434	2.26674	67.3703	5.8142	3.24918e-06	0.0100563	intron	InterCpgi
chr1	211951576	LPGAT1	98.789	0.494136	86.8699	4.12133	3.25636e-06	0.0100564	intron	InterCpgi
chr14	92981227	RIN3	21.7254	1.90889	6.94997	2.25375	3.2579e-06	0.0100564	intron	CpG_Island
chr17	61817284	STRADA	59.4885	5.50769	88.4489	3.30518	3.26521e-06	0.0100596	utr5	north_shore
chr19	42573955	GRIK5	1.41686	0.548481	12.5326	3.21993	3.26763e-06	0.0100596	intergenic	InterCpgi
chr1	2464168	HES5	35.2601	4.70018	11.6256	2.02681	3.27292e-06	0.0100625	intergenic	south_shelf
chr10	134942468	GPR123	47.9983	3.39181	19.8956	6.78777	3.27842e-06	0.0100661	exon	CpG_Island
chr15	70446824	-	21.4991	2.61214	44.9767	4.51422	3.28557e-06	0.0100747	intergenic	InterCpgi
chr15	76634525	ISL2	0	0	5.89343	2.24499	3.29217e-06	0.0100815	utr3	CpG_Island
chr13	113009175	-	84.781	5.01605	48.4993	4.21387	3.30544e-06	0.0101088	intergenic	InterCpgi
chr20	58508182	C20orf177	84.4073	3.47978	100	0	3.31296e-06	0.0101184	promoter	CpG_Island
chr20	58508182	SYCP2	84.4073	3.47978	100	0	3.31296e-06	0.0101184	promoter	CpG_Island
chr16	85272014	-	44.7353	3.89497	71.4036	3.51631	3.32689e-06	0.0101476	intergenic	south_shelf
chr14	93154180	RIN3	61.0705	6.88015	91.5078	4.26192	3.34934e-06	0.0101625	intron	CpG_Island
chr19	8372032	CD320	19.7531	3.622	49.6635	4.7486	3.34153e-06	0.0101625	intron	north_shore
chr22	23863626	-	5.26401	1.54778	23.2925	6.55816	3.34573e-06	0.0101625	intergenic	north_shore
chr5	1196231	-	65.3469	4.15583	25.0172	10.0366	3.33668e-06	0.0101625	intergenic	CpG_Island
chr16	85555435	-	86.9773	2.00893	99.5098	0.490196	3.35473e-06	0.0101656	intergenic	south_shelf
chr1	209032510	-	89.2698	3.5752	59.7398	1.3369	3.36303e-06	0.0101774	intergenic	InterCpgi
chr1	228024163	PRSS38	78.404	1.09564	65.8698	4.4611	3.37359e-06	0.010196	intron	InterCpgi
chr3	47912406	MAP4	25.8282	2.94664	51.3655	2.19558	3.38399e-06	0.0102141	exon	InterCpgi
chr10	96285253	TBC1D12	57.6994	10.9393	0.471698	0.471698	3.38883e-06	0.0102154	intron	InterCpgi
chr16	80411020	-	10.1629	1.73348	0	0	3.39867e-06	0.0102225	intergenic	InterCpgi
chr17	79066746	BAIAP2	74.8148	2.94381	95.4469	2.45812	3.40002e-06	0.0102225	intron	InterCpgi
chrX	152971693	BCAP31	51.2419	2.28003	32.2061	3.13327	3.40496e-06	0.0102241	intron	InterCpgi
chr17	74953921	-	19.2184	2.44293	44.8706	16.3964	3.43393e-06	0.0102977	intergenic	InterCpgi
chr19	39346683	HNRNPL	52.9407	3.2602	29.7161	5.36496	3.45946e-06	0.0103413	intergenic	south_shelf
chr19	5067831	KDM4B	46.8464	5.51416	17.0424	4.50575	3.46186e-06	0.0103413	intron	south_shore
chr6	166580364	T	1.70846	0.8584	12.5328	2.13047	3.45922e-06	0.0103413	intron	CpG_Island
chr20	62318116	RTEL1	36.8048	4.33244	64.9854	5.13624	3.47408e-06	0.0103589	intron	south_shore
chr7	73414125	-	30.7368	4.62524	59.4576	2.11543	3.4767e-06	0.0103589	intergenic	InterCpgi
chr4	110314783	-	93.6691	2.2286	73.0368	8.38343	3.49604e-06	0.0103994	intergenic	InterCpgi
chr9	122490985	-	91.2266	1.91047	76.63	3.72832	3.49928e-06	0.0103994	intergenic	InterCpgi
chr20	36543429	VSTM2L	0	0	7.22329	1.60797	3.51819e-06	0.0104343	intron	InterCpgi
chr5	1005435	NKD2	40.1329	4.9666	8.78533	3.11457	3.52006e-06	0.0104343	intergenic	CpG_Island
chr18	77835871	-	100	0	86.0952	3.13973	3.52991e-06	0.0104502	intergenic	CpG_Island
chr14	99724986	BCL11B	21.5406	3.65606	48.6607	4.48533	3.57061e-06	0.0105356	intron	InterCpgi
chr19	58729520	-	56.9478	2.93206	33.4513	1.88849	3.57013e-06	0.0105356	intergenic	south_shore
chr2	131936543	-	19.6881	3.08353	5.38019	2.54096	3.58152e-06	0.0105356	intergenic	InterCpgi
chr21	44574299	-	91.1565	4.43048	55.9921	4.38613	3.57849e-06	0.0105356	intergenic	south_shore
chr3	49941409	MST1R	14.3235	3.75844	35.7321	5.22601	3.5792e-06	0.0105356	promoter	CpG_Island
chr3	19609449	-	93.7999	0.838307	79.7838	3.02634	3.59539e-06	0.010563	intergenic	InterCpgi
chr7	39833144	NCRNA00265	23.8925	2.05158	58.7723	10.9424	3.6087e-06	0.0105887	exon	north_shore
chr11	47266336	ACP2	87.1716	2.73117	99.1071	0.892857	3.62075e-06	0.0106106	exon	north_shelf
chr11	47266336	NR1H3	87.1716	2.73117	99.1071	0.892857	3.62075e-06	0.0106106	exon	north_shelf
chr12	65336340	FLJ41278	90.8712	2.64237	100	0	3.64092e-06	0.0106562	intergenic	InterCpgi
chr16	2042815	SYNGR3	17.7356	3.84943	0	0	3.65647e-06	0.0106882	intron	CpG_Island
chr4	1035347	-	14.8966	3.53851	38.5138	2.68939	3.69274e-06	0.0107806	intergenic	InterCpgi
chr8	103476714	-	58.3035	3.31994	29.3298	3.86525	3.70227e-06	0.0107948	intergenic	InterCpgi
chr5	92939855	-	20.5763	5.03698	0	0	3.74811e-06	0.0109147	intergenic	CpG_Island
chr10	88730637	C10orf116	0	0	7.43878	2.9826	3.75588e-06	0.0109202	utr5	CpG_Island
chr10	88730637	AGAP11	0	0	7.43878	2.9826	3.75588e-06	0.0109202	utr5	CpG_Island
chr7	127670470	SND1	72.4404	5.16288	96.9643	1.80643	3.75943e-06	0.0109202	exon	north_shore
chr7	127670470	LRRC4	72.4404	5.16288	96.9643	1.80643	3.75943e-06	0.0109202	exon	north_shore
chr14	104638285	KIF26A	56.2808	4.67885	31.0481	2.33018	3.76883e-06	0.0109285	intron	CpG_Island
chr2	122491187	MKI67IP	86.1781	4.33787	100	0	3.77174e-06	0.0109285	intron	north_shelf
chr1	25982883	MAN1C1	64.7232	4.30501	26.5966	11.4212	3.78084e-06	0.0109333	intron	InterCpgi
chr2	174890813	-	41.9393	3.63093	69.1234	6.17677	3.78282e-06	0.0109333	intergenic	CpG_Island
chrX	31590187	DMD	50.4053	1.89038	69.7613	2.70413	3.78803e-06	0.0109347	intron	InterCpgi
chr9	140138777	FAM166A	1.87812	0.950361	16.7654	1.25532	3.82037e-06	0.0110143	intron	south_shelf
chr4	77869775	2020-09-11	2.19886	1.10792	24.0385	10.2213	3.82841e-06	0.0110237	promoter	CpG_Island
chr3	123987919	KALRN	96.3505	1.359	83.8961	3.73588	3.84438e-06	0.011056	exon	CpG_Island
chrX	16921038	-	32.6577	2.87469	60.0922	3.37383	3.86028e-06	0.0110879	intergenic	InterCpgi
chr11	87802260	-	100	0	79.3505	5.20545	3.88416e-06	0.0111021	intergenic	InterCpgi
chr5	77158052	-	92.209	1.25934	85.4749	5.32574	3.88439e-06	0.0111021	intergenic	InterCpgi
chr7	4225548	SDK1	14.0038	3.57514	54.4329	9.75392	3.88325e-06	0.0111021	intron	InterCpgi
chrX	49687340	CLCN5	28.6759	4.17306	72.9332	9.4321	3.87662e-06	0.0111021	utr5	CpG_Island
chr11	68890338	-	15.724	2.06822	31.4798	3.9514	3.90318e-06	0.0111338	intergenic	InterCpgi
chr4	3252129	C4orf44	92.3011	2.34682	59.0842	11.1489	3.90511e-06	0.0111338	intron	south_shore
chr22	17883998	-	48.6565	9.13236	16.8137	6.26397	3.93706e-06	0.0112111	utr5	InterCpgi
chr17	1386979	MYO1C	68.2302	2.71932	90.1515	4.50934	3.95487e-06	0.0112342	exon	north_shore
chr6	15333309	JARID2	97.6989	0.871217	80.6939	5.70316	3.95296e-06	0.0112342	utr5	InterCpgi
chr16	1170596	-	19.2624	6.36551	50.8333	3.0328	3.96116e-06	0.0112383	intergenic	InterCpgi
chr10	133450131	-	66.7026	4.40837	96.4286	3.57143	4.00525e-06	0.0113494	intergenic	south_shore
chr5	170827522	NPM1	97.3138	1.77361	80.848	2.2382	4.01448e-06	0.0113617	intron	InterCpgi
chrX	11446082	ARHGAP6	20.0744	3.47258	0	0	4.02438e-06	0.0113758	promoter	CpG_Island
chr22	28123181	-	51.4182	6.61475	90.2256	3.37649	4.04516e-06	0.0114206	intergenic	InterCpgi
chr6	159306174	C6orf99	36.0228	3.58984	18.8083	2.65023	4.05068e-06	0.0114222	utr5	InterCpgi
chr3	138656729	-	8.02152	2.8443	34.1211	3.66867	4.05607e-06	0.0114235	exon	CpG_Island
chr10	77156249	-	16.2755	2.87649	33.0026	6.3822	4.07481e-06	0.0114505	intergenic	CpG_Island
chr2	241310340	-	14.7078	3.3298	0	0	4.07553e-06	0.0114505	intergenic	InterCpgi
chr12	82751	-	36.8141	4.65288	5	5	4.09231e-06	0.0114837	intergenic	InterCpgi
chr10	10079534	-	47.2858	4.32825	80.4924	7.65348	4.10877e-06	0.011502	intergenic	InterCpgi
chr5	40722776	TTC33	100	0	69.707	9.99513	4.10521e-06	0.011502	intron	InterCpgi
chr20	40598799	-	64.8844	1.6486	82.4334	5.31172	4.13101e-06	0.0115503	intergenic	InterCpgi
chr2	119610498	EN1	11.363	1.73218	31.3419	2.82854	4.15543e-06	0.0116046	intergenic	north_shore
chrX	153600551	FLNA	18.3951	3.32751	43.8777	6.61027	4.17723e-06	0.0116514	utr5	CpG_Island
chr2	209242248	-	66.5893	7.57692	95.207	2.90668	4.19093e-06	0.0116563	intergenic	InterCpgi
chr3	126703118	PLXNA1	42.6403	2.70568	57.8207	4.70989	4.19064e-06	0.0116563	intergenic	CpG_Island
chr3	129342469	-	41.0269	5.76823	71.8357	3.81908	4.19409e-06	0.0116563	intergenic	north_shelf
chr12	133159349	FBRSL1	63.7715	4.53488	91.8182	2.89866	4.20753e-06	0.0116796	intron	CpG_Island
chr11	74394883	-	16.1145	1.10895	37.4003	5.86581	4.21691e-06	0.0116916	intergenic	south_shore
chr8	11716762	CTSB	86.8522	1.94432	67.1994	6.83388	4.22642e-06	0.011704	utr5	InterCpgi
chr18	52626576	CCDC68	10.812	1.52304	29.5874	4.21312	4.23946e-06	0.0117261	promoter	CpG_Island
chr13	44838259	-	70.0325	3.5609	42.1761	4.90824	4.29113e-06	0.0118489	intergenic	InterCpgi
chr22	39345960	-	24.9988	2.33258	45.0307	3.52785	4.29921e-06	0.0118489	intergenic	InterCpgi
chr7	151393065	PRKAG2	71.2711	3.3134	91.4084	3.17652	4.29555e-06	0.0118489	intron	InterCpgi
chr2	235860020	SH3BP4	4.15255	1.2013	16.8846	2.77012	4.32843e-06	0.0119011	intergenic	north_shore
chr9	96716857	BARX1	39.1177	4.8361	70.9654	2.21319	4.32723e-06	0.0119011	intron	CpG_Island
chr11	45686055	CHST1	6.08559	1.19528	20.9641	4.9583	4.36292e-06	0.0119722	utr5	north_shore
chr6	163818081	-	13.5519	2.94379	48.1361	8.38024	4.36983e-06	0.0119722	intergenic	InterCpgi
chr8	43557135	-	66.2404	3.40867	86.4699	4.88788	4.36578e-06	0.0119722	intergenic	InterCpgi
chr11	69063311	MYEOV	14.3851	1.84686	1.41509	1.41509	4.38548e-06	0.0119867	exon	InterCpgi
chr17	16933519	-	22.2195	3.81796	53.1214	4.82403	4.38251e-06	0.0119867	intergenic	InterCpgi
chr9	140357942	PNPLA7	33.2047	2.58963	57.1683	2.12374	4.43039e-06	0.0120952	exon	south_shore
chr9	140357942	NELF	33.2047	2.58963	57.1683	2.12374	4.43039e-06	0.0120952	exon	south_shore
chr9	33811289	-	98.5397	0.538406	93.1212	2.39704	4.43896e-06	0.0121043	intergenic	InterCpgi
chr5	2755737	IRX2	29.6303	3.30275	6.74242	3.89323	4.49488e-06	0.0122386	intergenic	CpG_Island
chr8	125933693	-	49.7959	4.23845	8.33333	8.33333	4.49878e-06	0.0122386	intergenic	InterCpgi
chr15	56024937	PRTG	16.5186	2.44767	39.8868	4.24489	4.5232e-06	0.0122906	intron	InterCpgi
chr21	46726440	-	24.2698	8.07473	66.4263	4.58041	4.53601e-06	0.0122965	intergenic	south_shelf
chr7	51873598	-	98.0201	1.49979	79.4154	5.84467	4.53538e-06	0.0122965	intergenic	InterCpgi
chr22	36748198	MYH9	34.1667	4.59523	59.772	5.60568	4.54357e-06	0.0123026	utr5	InterCpgi
chr11	66639476	PC	14.7455	2.22839	39.2029	8.2267	4.55163e-06	0.01231	intron	InterCpgi
chr14	75388184	RPS6KL1	87.697	6.83102	24.2763	8.85294	4.59191e-06	0.012383	exon	north_shore
chr19	36451134	-	44.0332	9.84166	15.8333	3.99653	4.58505e-06	0.012383	intergenic	CpG_Island
chr2	2189834	MYT1L	95.6124	1.01733	83.367	3.57062	4.59464e-06	0.012383	utr5	CpG_Island
chr10	127229400	-	27.5748	5.27183	67.8202	7.61514	4.63275e-06	0.0124712	intergenic	InterCpgi
chr3	196227828	RNF168	16.7373	3.35513	44.1334	6.75436	4.65213e-06	0.0125014	intron	north_shore
chr5	138861649	TMEM173	24.9306	3.60796	51.1364	3.12965	4.65477e-06	0.0125014	utr5	InterCpgi
chr5	12958	-	31.6986	5.46251	68.079	5.19365	4.66127e-06	0.0125043	intergenic	InterCpgi
chr5	286319	PDCD6	49.7856	2.27686	29.8886	4.33405	4.66744e-06	0.0125064	utr5	InterCpgi
chr11	69278665	-	32.4251	4.94921	75.7143	2.47436	4.7048e-06	0.012534	intergenic	InterCpgi
chr19	19369278	HAPLN4	15.1068	2.22649	37.567	3.2405	4.70302e-06	0.012534	intron	CpG_Island
chr21	36164119	RUNX1	95.2665	1.97216	73.3763	5.3605	4.69542e-06	0.012534	utr3	north_shore
chr5	92932407	-	11.2565	2.53983	41.0863	8.80639	4.69899e-06	0.012534	intergenic	south_shore
chr9	138987911	NACC2	9.24497	3.65161	35.3034	4.04179	4.69915e-06	0.012534	promoter	south_shore
chr3	126701114	-	5.87558	0.923965	21.9907	2.62912	4.7709e-06	0.0126954	intergenic	north_shore
chr21	39334943	-	89.5183	1.89308	100	0	4.79893e-06	0.0127554	intergenic	InterCpgi
chr2	108191051	-	21.7987	3.25973	56.9139	3.56349	4.84822e-06	0.0128583	intergenic	InterCpgi
chr8	20416638	-	99.3506	0.649351	86.3276	4.83688	4.84877e-06	0.0128583	intergenic	InterCpgi
chr2	24999303	-	87.1229	3.39566	100	0	4.85985e-06	0.0128729	intergenic	InterCpgi
chr16	86277724	-	28.7008	3.76608	0	0	4.86616e-06	0.0128749	intergenic	InterCpgi
chr3	37494359	ITGA9	26.6565	2.40724	55.8715	4.00439	4.8976e-06	0.0129433	intron	CpG_Island
chr18	72175365	CNDP2	87.2068	2.80812	100	0	4.91282e-06	0.0129687	intron	InterCpgi
chr7	158766827	-	98.8249	0.782845	82.3161	5.53252	4.93628e-06	0.0130158	intergenic	CpG_Island
chr16	880233	-	50.2277	2.44088	71.5574	10.5466	4.95574e-06	0.0130523	intergenic	InterCpgi
chr1	8784631	RERE	34.5618	2.27324	48.4539	4.04445	4.96609e-06	0.0130647	utr5	InterCpgi
chr15	75076039	CSK	4.46054	1.30427	16.0139	2.3294	4.97381e-06	0.0130701	utr5	south_shore
chr2	223160216	CCDC140	46.2288	4.75212	75.116	2.15073	4.99353e-06	0.0131071	intron	CpG_Island
chr2	223160216	PAX3	46.2288	4.75212	75.116	2.15073	4.99353e-06	0.0131071	intron	CpG_Island
chr17	41401007	-	85.9037	2.11168	64.3445	5.83833	5.02947e-06	0.0131865	intergenic	InterCpgi
chr16	2959660	FLYWCH1	97.3534	1.73048	79.326	4.42562	5.04887e-06	0.0132223	intergenic	north_shore
chr19	18542490	SSBP4	27.5025	4.41634	70.9154	10.9116	5.07807e-06	0.0132838	exon	north_shore
chr20	45211477	SLC13A3	94.7599	0.970809	86.6643	4.97358	5.08586e-06	0.0132889	intron	InterCpgi
chr9	124498869	DAB2IP	21.1451	2.89603	51.8048	6.51512	5.09151e-06	0.0132889	intron	CpG_Island
chr10	105421151	SH3PXD2A	39.0032	2.91601	56.2945	2.30084	5.11659e-06	0.0132944	intron	south_shore
chr1	17265592	CROCC	86.1988	3.19882	60.9135	9.33019	5.10091e-06	0.0132944	exon	InterCpgi
chr6	100098308	-	98.3929	1.04633	82.5397	7.00933	5.10993e-06	0.0132944	intergenic	InterCpgi
chrX	153041561	PLXNB3	48.1719	3.51867	16.9408	5.95034	5.11386e-06	0.0132944	exon	south_shelf
chrX	153041561	SRPK3	48.1719	3.51867	16.9408	5.95034	5.11386e-06	0.0132944	exon	south_shelf
chr20	52253884	-	58.5151	4.16521	30.5458	1.44439	5.13783e-06	0.0133204	intergenic	InterCpgi
chr7	5401453	TNRC18	83.4893	2.52314	100	0	5.13811e-06	0.0133204	intron	CpG_Island
chr11	64481587	NRXN2	12.6967	1.53994	28.1844	3.6654	5.19038e-06	0.0133972	utr5	south_shore
chr17	76127701	TMC6	20.583	6.31991	55.6964	5.21491	5.17478e-06	0.0133972	utr5	CpG_Island
chr17	76127701	TMC8	20.583	6.31991	55.6964	5.21491	5.17478e-06	0.0133972	utr5	CpG_Island
chr18	13136146	-	45.4788	1.50043	71.8954	5.72316	5.18933e-06	0.0133972	intergenic	north_shore
chrX	40030673	BCOR	5.73644	1.04326	21.9818	6.63462	5.19087e-06	0.0133972	utr5	south_shore
chr16	11017875	CIITA	33.7232	4.05336	5.59524	3.92857	5.22499e-06	0.0134702	utr3	InterCpgi
chr11	68776419	MRGPRF	32.406	3.87593	62.7827	5.18447	5.25719e-06	0.0135338	intron	south_shelf
chr22	50485380	TTLL8	61.8512	2.50129	28.1176	8.51446	5.26131e-06	0.0135338	intergenic	south_shore
chr12	5112360	-	3.72417	1.13205	14.2199	2.65157	5.2966e-06	0.013596	intergenic	InterCpgi
chr19	18822390	CRTC1	5.10275	1.84941	30.782	5.92119	5.29724e-06	0.013596	intron	InterCpgi
chr10	45676193	LOC338579	90.0545	1.60382	72.0649	3.68952	5.31871e-06	0.013616	intergenic	InterCpgi
chr11	68084369	LRP5	10.9889	1.70035	25.9571	3.26024	5.31744e-06	0.013616	utr5	south_shelf
chr19	3673669	PIP5K1C	40.1647	3.44357	9.16667	4.16667	5.32271e-06	0.013616	intron	south_shore
chrX	21959416	SMS	33.768	3.02031	2.77778	2.77778	5.33456e-06	0.0136313	intron	CpG_Island
chr7	1562612	-	18.2148	4.39935	0	0	5.3449e-06	0.0136426	intergenic	InterCpgi
chrX	92076712	-	15.8554	3.02561	50.9524	2.208	5.36944e-06	0.0136902	intergenic	InterCpgi
chr14	68189608	RDH12	10.6383	1.527	25.713	6.45264	5.38966e-06	0.0137266	intron	InterCpgi
chr11	117534710	DSCAML1	20.103	2.69735	46.859	6.0654	5.40906e-06	0.0137609	intron	InterCpgi
chr10	69987064	-	92.2394	2.16804	76.9086	0.72599	5.4232e-06	0.013775	intergenic	north_shelf
chr6	43598374	MAD2L1BP	36.3379	6.85238	3.57143	3.57143	5.4265e-06	0.013775	promoter	south_shore
chr6	43598374	GTPBP2	36.3379	6.85238	3.57143	3.57143	5.4265e-06	0.013775	promoter	south_shore
chr20	21372126	-	73.2136	2.33989	47.9798	5.52101	5.43397e-06	0.0137752	intergenic	CpG_Island
chr6	10488180	-	50.0101	7.49128	93.0288	4.06764	5.43849e-06	0.0137752	intergenic	InterCpgi
chr16	4414870	CORO7	51.4327	4.2765	83.4936	2.97879	5.45465e-06	0.013801	exon	InterCpgi
chr16	68016332	DPEP3	36.8175	5.15602	5.57276	3.22735	5.48318e-06	0.013843	promoter	south_shore
chr6	160287952	-	52.9583	5.31188	85.7168	2.23253	5.47864e-06	0.013843	intergenic	InterCpgi
chr1	54470065	-	61.62	5.47648	89.8201	2.1929	5.52332e-06	0.013914	intergenic	InterCpgi
chr16	11536905	-	95.6859	1.77856	74.6385	6.80039	5.52315e-06	0.013914	intergenic	InterCpgi
chr13	99083808	FARP1	33.2394	1.94649	61.6488	5.52594	5.54396e-06	0.0139508	intron	InterCpgi
chr19	47960175	SLC8A2	33.3932	3.7427	7.16982	3.61831	5.56755e-06	0.013995	intron	CpG_Island
chr15	76630094	ISL2	2.53968	1.70958	22.4242	3.66153	5.58634e-06	0.0140269	intron	CpG_Island
chr12	34487195	-	96.9835	0.925104	79.0689	5.39716	5.60341e-06	0.0140545	intergenic	north_shore
chr16	85527215	-	52.6884	3.84227	80.9236	5.10186	5.61228e-06	0.0140545	intergenic	north_shelf
chr22	47521142	TBC1D22A	46.7726	6.32751	79.5349	2.65283	5.61551e-06	0.0140545	intron	InterCpgi
chr11	66852528	-	38.8451	3.19885	12.7027	9.44916	5.6236e-06	0.0140595	intergenic	InterCpgi
chr1	156212911	PMF1-BGLAP	26.0952	3.86796	57.5934	5.21379	5.68243e-06	0.014077	utr3	north_shelf
chr1	156212911	BGLAP	26.0952	3.86796	57.5934	5.21379	5.68243e-06	0.014077	utr3	north_shelf
chr1	16164090	FLJ37453	64.5761	4.22681	90.7516	4.24195	5.65971e-06	0.014077	intergenic	CpG_Island
chr1	200429865	-	99.2063	0.793651	86.4676	5.34833	5.65394e-06	0.014077	intergenic	InterCpgi
chr14	105173320	INF2	87.0387	1.98323	69.606	7.92211	5.67573e-06	0.014077	exon	InterCpgi
chr16	81739132	CMIP	98.2616	0.903807	84.8289	3.23092	5.6662e-06	0.014077	exon	InterCpgi
chr19	21689849	ZNF429	76.2132	2.8658	98.913	1.08696	5.68531e-06	0.014077	intron	south_shore
chr20	60380015	CDH4	98.2841	0.871764	90.0262	4.135	5.67886e-06	0.014077	intron	InterCpgi
chr4	913988	GAK	88.7595	1.5252	69.9764	3.6065	5.65536e-06	0.014077	intron	InterCpgi
chr9	133534952	-	14.6939	3.92185	0	0	5.68115e-06	0.014077	intergenic	CpG_Island
chr1	23962506	MDS2	95.0319	1.34458	85.7129	2.09696	5.755e-06	0.0142343	intergenic	InterCpgi
chr5	135538704	-	11.7756	3.14186	44.307	6.9287	5.81226e-06	0.0143453	intergenic	InterCpgi
chr6	100270139	-	99.5074	0.492611	84.6816	4.47278	5.81021e-06	0.0143453	intergenic	InterCpgi
chr22	49962655	-	22.7656	2.91855	57.5858	5.63993	5.81889e-06	0.0143463	intergenic	InterCpgi
chr5	128927987	ADAMTS19	84.898	4.81582	41.4363	8.63889	5.82612e-06	0.0143489	intron	InterCpgi
chr12	31128188	TSPAN11	37.733	3.07198	19.3424	1.41846	5.84457e-06	0.0143649	intron	InterCpgi
chr19	21689758	ZNF429	67.6254	5.27076	94.4094	2.43847	5.85136e-06	0.0143649	intron	south_shore
chr6	1524680	-	40.4989	2.63193	62.3866	8.57758	5.86363e-06	0.0143649	intergenic	south_shore
chr7	6647465	C7orf26	44.5845	2.48914	23.1617	4.98016	5.8589e-06	0.0143649	intron	CpG_Island
chrX	111777667	-	84.0773	3.58557	100	0	5.86366e-06	0.0143649	intergenic	InterCpgi
chr9	96009557	WNK2	58.6133	7.56908	14.2361	6.95312	5.88352e-06	0.0143983	intron	north_shore
chr6	169161590	-	64.8662	2.69472	39.9709	4.49633	5.92288e-06	0.0144641	intergenic	InterCpgi
chrX	47078585	CDK16	0	0	8.05556	5.27778	5.91996e-06	0.0144641	utr5	CpG_Island
chr3	164841773	-	91.9021	1.35836	77.5954	2.14389	5.93332e-06	0.0144743	intergenic	InterCpgi
chr13	64652983	-	90.2131	1.98853	68.5749	10.481	5.96594e-06	0.0145386	intergenic	InterCpgi
chr15	96911765	-	3.99098	1.30256	25.726	10.0155	5.97939e-06	0.014556	intergenic	CpG_Island
chrX	108976674	ACSL4	16.8197	3.34533	1.5625	1.5625	5.99302e-06	0.0145739	promoter	CpG_Island
chr11	18743503	IGSF22	5.47968	2.24434	22.1419	1.67983	6.04294e-06	0.0145983	exon	CpG_Island
chr13	96294417	DZIP1	4.712	1.81723	23.4807	3.82545	6.05861e-06	0.0145983	utr5	CpG_Island
chr15	23618644	-	98.2785	0.713891	88.8492	5.5557	6.02337e-06	0.0145983	intergenic	InterCpgi
chr17	75405482	2020-09-09	3.49693	1.33605	29.1071	15.1056	6.05506e-06	0.0145983	intron	InterCpgi
chr17	79873768	SIRT7	98.7736	0.864342	83.9636	3.20018	6.04854e-06	0.0145983	intron	north_shore
chr17	79873768	PCYT2	98.7736	0.864342	83.9636	3.20018	6.04854e-06	0.0145983	intron	north_shore
chr20	34356110	PHF20	13.5978	4.73311	47.0238	7.91913	6.01893e-06	0.0145983	intergenic	north_shelf
chr2	121691647	GLI2	75.9212	3.09585	94.7231	1.20936	6.0368e-06	0.0145983	intron	InterCpgi
chr2	71116191	-	3.03419	1.19445	16.4509	2.44182	6.01638e-06	0.0145983	intergenic	CpG_Island
chr8	145066281	GRINA	41.393	5.8896	8.92857	5.17777	6.05981e-06	0.0145983	intron	south_shore
chr2	95693487	MAL	57.566	2.77655	32.5334	2.77527	6.07117e-06	0.0146105	intron	south_shore
chr11	69979495	ANO1	76.9957	4.23037	92.959	1.26149	6.13618e-06	0.0147363	intron	InterCpgi
chr19	58668933	-	93.6444	2.2804	70.9945	2.56405	6.13069e-06	0.0147363	intergenic	south_shelf
chr17	78850575	RPTOR	81.7133	2.88374	97.7273	2.27273	6.14919e-06	0.0147522	intron	CpG_Island
chr2	129125212	-	53.7384	3.59898	79.3085	4.47653	6.16852e-06	0.0147557	intergenic	InterCpgi
chr22	46770446	CELSR1	29.3564	2.34435	62.7295	8.09707	6.16975e-06	0.0147557	intron	CpG_Island
chr5	176754722	-	39.4833	5.01993	68.3554	2.87766	6.16921e-06	0.0147557	intergenic	InterCpgi
chr1	12203784	TNFRSF8	13.301	1.68311	28.0772	5.51659	6.18615e-06	0.0147644	utr3	InterCpgi
chr20	60380031	CDH4	83.783	3.44219	99.4792	0.520833	6.18014e-06	0.0147644	intron	InterCpgi
chr6	168481403	FRMD1	84.4694	2.4581	57.8206	7.07075	6.19424e-06	0.0147685	promoter	south_shore
chr11	7687127	CYB5R2	17.5204	2.25259	38.4921	5.31864	6.21699e-06	0.0148075	exon	InterCpgi
chr12	5744416	ANO2	75.0937	4.15885	45.7251	5.10793	6.25576e-06	0.014854	exon	InterCpgi
chr16	67008178	CES3	77.5222	4.92883	89.403	4.80355	6.2515e-06	0.014854	utr3	InterCpgi
chr17	2283357	SGSM2	87.5711	3.31264	60.388	5.42766	6.24744e-06	0.014854	utr3	InterCpgi
chr1	47127857	ATPAF1	100	0	88.4187	5.17783	6.27752e-06	0.0148842	utr5	InterCpgi
chr4	6310748	-	19.9432	1.52339	5.71809	2.13836	6.28135e-06	0.0148842	intergenic	InterCpgi
chr16	78093852	-	82.1902	2.77119	62.4269	4.98708	6.29146e-06	0.0148929	intergenic	InterCpgi
chr16	1143563	C1QTNF8	16.6164	1.77107	32.3289	4.12575	6.33853e-06	0.014989	exon	CpG_Island
chr11	32559286	-	84.3289	4.01533	100	0	6.36055e-06	0.0150104	intergenic	InterCpgi
chr12	121890488	KDM2B	50.1692	7.57416	90.3509	4.22415	6.35552e-06	0.0150104	intron	CpG_Island
chr8	143839605	-	45.2561	3.52078	75.2462	8.45612	6.36767e-06	0.0150119	intergenic	InterCpgi
chr11	66084631	CD248	0	0	11.3333	4.05294	6.37653e-06	0.0150175	promoter	south_shore
chr1	89130119	-	100	0	85.3175	2.15074	6.38691e-06	0.0150266	intergenic	InterCpgi
chr1	1685573	NADK	53.3029	3.43118	27.9458	17.4235	6.41142e-06	0.015057	exon	CpG_Island
chr19	49339590	HSD17B14	44.0118	3.12159	73.5563	8.1456	6.41281e-06	0.015057	exon	north_shore
chr2	129204159	-	18.2606	2.75582	5.13717	1.08156	6.42327e-06	0.0150663	intergenic	InterCpgi
chr8	145106455	OPLAH	11.4735	2.2719	42.1079	7.19483	6.46624e-06	0.0151517	intron	CpG_Island
chr2	26785905	OTOF	0.947743	0.472828	7.72471	2.73315	6.4897e-06	0.0151913	intron	CpG_Island
chr2	26785905	C2orf70	0.947743	0.472828	7.72471	2.73315	6.4897e-06	0.0151913	intron	CpG_Island
chr2	237476698	CXCR7	3.6388	1.10209	14.8119	2.78988	6.50744e-06	0.0152174	intergenic	CpG_Island
chr3	49839798	CDHR4	9.80791	2.91348	42.5087	10.3243	6.53259e-06	0.0152608	promoter	north_shore
chr3	49839798	C3orf54	9.80791	2.91348	42.5087	10.3243	6.53259e-06	0.0152608	promoter	north_shore
chr11	117400812	DSCAML1	59.8498	2.75966	40.7516	5.313	6.55489e-06	0.0152667	intron	InterCpgi
chr11	89900399	NAALAD2	100	0	84.2758	3.15945	6.55069e-06	0.0152667	intron	InterCpgi
chr18	22804575	ZNF521	91.743	3.30389	67.9487	3.22642	6.56146e-06	0.0152667	exon	InterCpgi
chr7	100203418	PCOLCE	47.5212	5.74204	80.4187	3.01185	6.5444e-06	0.0152667	promoter	CpG_Island
chr17	77082334	ENGASE	84.8165	2.78416	100	0	6.59417e-06	0.0153214	exon	InterCpgi
chr21	35526031	-	96.921	0.73996	86.6904	3.39646	6.59822e-06	0.0153214	intergenic	InterCpgi
chr15	31774773	-	56.6486	3.20413	80.5467	2.29396	6.61928e-06	0.0153549	intergenic	north_shore
chr12	121974011	KDM2B	7.08594	1.39346	19.8232	3.89651	6.64778e-06	0.0153911	intron	north_shore
chr3	38568272	-	79.9062	3.04942	99.0385	0.961538	6.64817e-06	0.0153911	intergenic	InterCpgi
chr7	128329463	-	74.5513	4.79902	96.1925	2.21772	6.69164e-06	0.0154762	intergenic	InterCpgi
chr16	33966039	-	45.4109	5.80629	71.5292	4.06237	6.72354e-06	0.0155345	intergenic	CpG_Island
chr16	12358495	SNX29	34.3205	2.69578	61.589	8.47662	6.77633e-06	0.015601	intron	south_shelf
chr19	41115486	LTBP4	19.5844	2.09826	42.4077	6.01803	6.78418e-06	0.015601	exon	CpG_Island
chr4	675952	MFSD7	71.9022	5.6914	93.1744	2.85575	6.786e-06	0.015601	exon	CpG_Island
chr7	63359690	-	47.5696	3.50526	73.5067	5.64978	6.75963e-06	0.015601	intergenic	north_shore
chr9	136282943	ADAMTS13	1.87013	1.32883	24.4581	5.32862	6.7804e-06	0.015601	utr5	CpG_Island
chr9	136282943	REXO4	1.87013	1.32883	24.4581	5.32862	6.7804e-06	0.015601	utr5	CpG_Island
chr10	35928431	FZD8	40.9638	4.85218	74.9858	5.05183	6.8091e-06	0.0156281	exon	north_shore
chr21	43816242	TMPRSS3	36.3708	1.72393	11.4194	4.35934	6.81132e-06	0.0156281	promoter	InterCpgi
chr11	67803782	NDUFS8	44.736	3.10825	17.3874	1.30939	6.82427e-06	0.0156325	exon	north_shelf
chr11	67803782	TCIRG1	44.736	3.10825	17.3874	1.30939	6.82427e-06	0.0156325	exon	north_shelf
chr1	66871679	-	84.1312	2.76905	98.2857	1.01686	6.8283e-06	0.0156325	intergenic	InterCpgi
chr20	62085630	KCNQ2	0	0	5.82665	2.05936	6.8434e-06	0.0156325	intron	CpG_Island
chr5	172175596	-	33.6424	3.95658	59.4673	5.17294	6.847e-06	0.0156325	intergenic	CpG_Island
chr7	150745691	ACCN3	65.973	3.61668	40.252	2.67429	6.83444e-06	0.0156325	utr5	north_shore
chr8	143699493	ARC	89.402	2.52796	100	0	6.87436e-06	0.0156795	intergenic	south_shelf
chr10	35897345	GJD4	74.0466	2.31452	95	5	6.88124e-06	0.0156798	exon	CpG_Island
chr1	3414234	MEGF6	92.4635	1.9428	74.8116	6.69222	6.90475e-06	0.015685	intron	InterCpgi
chr17	56416995	-	33.2545	1.90983	61.5038	8.234	6.90941e-06	0.015685	intergenic	InterCpgi
chr20	49931043	-	25.1203	3.03886	52.9934	5.38826	6.91066e-06	0.015685	intergenic	InterCpgi
chr4	12611291	-	98.8571	1.14286	82.2115	3.05329	6.90738e-06	0.015685	intergenic	InterCpgi
chr2	219866375	MIR375	23.1659	3.41168	47.2042	4.39221	6.92177e-06	0.0156949	exon	CpG_Island
chr17	65861065	BPTF	100	0	87.3405	4.24866	6.94964e-06	0.0157427	intron	InterCpgi
chr1	224403223	-	39.0351	5.50029	61.8423	1.94489	6.97384e-06	0.0157666	intergenic	InterCpgi
chr19	1070729	HMHA1	7.53443	1.89566	0	0	6.97278e-06	0.0157666	promoter	south_shore
chr10	118055072	-	98.1868	1.20671	73.5164	8.1369	7.00583e-06	0.0157869	intergenic	InterCpgi
chr10	99068494	-	60.6949	1.8445	32.179	6.79897	7.01287e-06	0.0157869	intergenic	InterCpgi
chr1	14746121	-	41.9941	3.36933	22.9556	1.35947	7.00173e-06	0.0157869	intergenic	InterCpgi
chr21	11170452	-	83.9611	2.28144	67.8999	2.42361	7.01763e-06	0.0157869	intergenic	InterCpgi
chr2	23910672	KLHL29	37.9654	4.94565	10.0821	2.59242	7.01094e-06	0.0157869	intron	north_shelf
chr5	33936970	RXFP3	7.06599	1.56585	0	0	7.02372e-06	0.0157869	exon	CpG_Island
chr1	11527094	-	70.75	3.18762	43.6124	4.94194	7.07457e-06	0.0158858	intergenic	InterCpgi
chr4	57182316	KIAA1211	95.2693	1.36932	84.4528	5.9298	7.09011e-06	0.0159052	exon	south_shore
chr13	114843021	RASA3	51.5969	6.35291	23.0917	5.78576	7.11031e-06	0.0159183	intron	south_shore
chr2	97005746	NCAPH	100	0	84.7222	2.65952	7.11656e-06	0.0159183	utr5	south_shelf
chr4	128831418	-	80.6678	4.16517	100	0	7.11548e-06	0.0159183	intergenic	InterCpgi
chr17	29717876	RAB11FIP4	14.7108	2.45489	36.7764	7.54608	7.13039e-06	0.0159338	promoter	north_shore
chr1	55008645	-	23.8956	4.79663	60.2282	7.7442	7.15305e-06	0.0159691	intergenic	south_shore
chr5	401168	AHRR	31.9342	3.79513	63.3704	6.96516	7.1603e-06	0.0159698	intron	InterCpgi
chr19	59025484	SLC27A5	14.9113	2.08077	0	0	7.17365e-06	0.0159842	exon	CpG_Island
chr19	59025484	ZBTB45	14.9113	2.08077	0	0	7.17365e-06	0.0159842	exon	CpG_Island
chr22	31503293	SELM	12.6774	2.82719	32.6431	3.48013	7.20152e-06	0.0160001	intron	CpG_Island
chr22	47567476	TBC1D22A	93.5653	1.91088	72.0699	8.10151	7.19566e-06	0.0160001	intron	InterCpgi
chr22	49698760	-	87.2789	2.13393	99.1935	0.806452	7.19249e-06	0.0160001	intergenic	CpG_Island
chr13	107028886	LOC728192	45.2446	4.78123	72.4667	4.85429	7.22271e-06	0.0160318	promoter	InterCpgi
chr11	46316834	CREB3L1	13.1077	2.67568	35.4296	1.93371	7.24132e-06	0.0160424	intron	north_shore
chr12	123867607	SETD8	61.1981	5.49133	90.3509	2.49633	7.2349e-06	0.0160424	promoter	north_shore
chr1	24097454	-	98.4066	0.899019	92.6419	1.49284	7.27265e-06	0.016081	intergenic	InterCpgi
chr4	7920748	AFAP1	81.8594	3.57043	46.3081	9.1563	7.2686e-06	0.016081	utr5	InterCpgi
chr19	18779814	KLHL26	98.2517	1.17957	81.645	3.84124	7.31687e-06	0.0161633	exon	CpG_Island
chr8	83353742	-	59.3912	9.0372	100	0	7.33235e-06	0.0161821	intergenic	InterCpgi
chr5	1223262	SLC6A18	62.8651	5.08767	36.1785	4.22156	7.35406e-06	0.0162145	utr3	north_shelf
chr5	1223262	SLC6A19	62.8651	5.08767	36.1785	4.22156	7.35406e-06	0.0162145	utr3	north_shelf
chr10	45471302	RASSF4	44.1604	3.91922	68.8739	3.08277	7.37438e-06	0.0162439	intron	south_shore
chr1	32176039	-	40.302	1.88095	65.8169	8.31506	7.43504e-06	0.0163309	intergenic	InterCpgi
chr3	124557606	ITGB5	1.86862	0.93776	20.4034	2.47839	7.43443e-06	0.0163309	intron	InterCpgi
chr4	105374058	-	86.5127	2.55688	97.5557	0.899179	7.42916e-06	0.0163309	intergenic	InterCpgi
chr1	11115767	SRM	0.839282	0.347135	3.87734	1.57424	7.45282e-06	0.0163349	intron	north_shelf
chr1	33742097	ZNF362	83.4419	5.56288	100	0	7.47215e-06	0.0163349	exon	CpG_Island
chr19	2015157	BTBD2	0.787749	0.372846	8.25099	3.21472	7.46873e-06	0.0163349	intron	InterCpgi
chr3	121657554	SLC15A2	100	0	90.1031	4.80609	7.45205e-06	0.0163349	intron	InterCpgi
chr7	43789468	-	45.8915	3.47897	19.1404	6.69297	7.47056e-06	0.0163349	intergenic	InterCpgi
chr6	15034290	-	13.9456	8.54412	90.8974	5.61913	7.49935e-06	0.0163789	intergenic	InterCpgi
chr1	169638595	-	58.323	1.47046	39.9436	3.83744	7.56956e-06	0.016499	intergenic	InterCpgi
chr1	21652484	ECE1	37.6275	4.60738	63.8988	4.5181	7.58287e-06	0.016499	intron	InterCpgi
chr17	79406442	BAHCC1	30.0086	2.92422	7.53751	2.5364	7.58234e-06	0.016499	intron	InterCpgi
chr19	18539848	SSBP4	16.2588	3.75538	46.25	2.39357	7.56434e-06	0.016499	intron	CpG_Island
chr17	76354955	SOCS3	40.8826	5.82032	71.9208	3.63247	7.59612e-06	0.0165123	exon	CpG_Island
chr14	93670489	C14orf142	58.3154	8.0565	90.2174	4.82034	7.61652e-06	0.0165412	intron	north_shelf
chr14	93670489	UBR7	58.3154	8.0565	90.2174	4.82034	7.61652e-06	0.0165412	intron	north_shelf
chr3	149226641	-	93.3327	2.05666	76.8362	2.54526	7.6615e-06	0.0166233	intergenic	InterCpgi
chr3	72872216	SHQ1	89.8417	2.32498	100	0	7.67143e-06	0.0166292	intron	InterCpgi
chr19	2290295	LINGO3	1.87404	1.20992	17.5878	2.24811	7.69434e-06	0.0166633	exon	CpG_Island
chr14	52589197	-	98.5714	1.42857	87.7606	1.52139	7.71276e-06	0.0166875	intergenic	InterCpgi
chr5	134802532	-	8.78532	2.94282	30.0216	2.7305	7.72069e-06	0.0166891	intergenic	InterCpgi
chr8	99960846	OSR2	25.1636	2.9076	52.5489	6.17482	7.73806e-06	0.016711	utr5	CpG_Island
chr5	140482107	PCDHB3	30.9177	3.06644	64.881	7.59949	7.75683e-06	0.016736	exon	CpG_Island
chr13	51991872	INTS6	81.6438	3.31836	100	0	7.78139e-06	0.0167733	utr5	InterCpgi
chr2	133014840	MIR663B	47.8194	3.02517	26.7754	5.63071	7.81938e-06	0.0168239	promoter	CpG_Island
chr2	133014840	ANKRD30BL	47.8194	3.02517	26.7754	5.63071	7.81938e-06	0.0168239	promoter	CpG_Island
chr5	25614667	-	64.7669	8.64426	100	0	7.81222e-06	0.0168239	intergenic	InterCpgi
chr16	88975897	CBFA2T3	46.2113	4.25656	13.4481	6.34379	7.90465e-06	0.0169916	utr5	CpG_Island
chr18	712914	ENOSF1	34.5478	3.21156	11.2817	4.71483	7.92786e-06	0.0169998	promoter	CpG_Island
chr20	39192223	-	56.3694	2.31678	71.3381	2.04544	7.93053e-06	0.0169998	intergenic	InterCpgi
chr3	71481462	FOXP1	57.2938	2.13382	82.2971	4.1673	7.91697e-06	0.0169998	utr5	InterCpgi
chr9	139856255	-	22.0199	4.99181	54.8591	4.33913	7.95636e-06	0.0170394	intergenic	InterCpgi
chr16	3232724	-	1.2519	0.591593	8.21429	3.45238	7.98396e-06	0.0170512	intergenic	north_shore
chr17	73748344	ITGB4	84.9472	2.72689	99.0196	0.980392	7.97821e-06	0.0170512	exon	north_shore
chr2	102091270	RFX8	41.6972	6.12027	85.8654	5.46951	7.97034e-06	0.0170512	promoter	south_shore
chr1	243430637	SDCCAG8	96.7105	1.25795	70.5	4.93194	7.9981e-06	0.0170657	intron	InterCpgi
chr19	4861240	PLIN3	46.3396	4.85586	79.5311	5.33506	8.0069e-06	0.0170687	intron	InterCpgi
chr2	234312346	DGKD	100	0	88.6683	3.0805	8.02998e-06	0.0171022	intron	InterCpgi
chr12	118407081	KSR2	0	0	5.10011	1.97867	8.04956e-06	0.0171058	promoter	CpG_Island
chr2	174397601	-	45.184	3.96682	15.107	5.02793	8.04941e-06	0.0171058	intergenic	InterCpgi
chr9	12539376	-	31.3974	2.42569	13.8843	3.53809	8.05384e-06	0.0171058	intergenic	InterCpgi
chr18	77209723	NFATC1	95.6341	1.04366	85.6382	2.78731	8.07245e-06	0.0171121	intron	south_shore
chr19	50155538	SCAF1	97.8997	1.09843	80.611	4.77818	8.07897e-06	0.0171121	exon	CpG_Island
chr20	30072035	REM1	35.9917	4.12291	4.41176	4.41176	8.07561e-06	0.0171121	exon	CpG_Island
chr20	30072035	NCRNA00028	35.9917	4.12291	4.41176	4.41176	8.07561e-06	0.0171121	exon	CpG_Island
chrX	19094385	GPR64	85.2709	2.82892	98.3765	0.943382	8.12091e-06	0.0171852	utr5	InterCpgi
chr14	74179440	PNMA1	32.2255	2.38063	61.3285	6.40485	8.14487e-06	0.0172201	exon	north_shore
chr11	68141057	LRP5	41.2281	4.58701	76.2308	6.87789	8.16424e-06	0.0172453	utr5	InterCpgi
chr12	132301959	-	85.0005	2.69567	99.0385	0.961538	8.2293e-06	0.0173038	intergenic	InterCpgi
chr15	91427773	FES	11.2041	3.07418	31.8231	3.27711	8.22249e-06	0.0173038	promoter	CpG_Island
chr7	150787506	AGAP3	7.71234	1.93965	27.6915	3.73642	8.21203e-06	0.0173038	utr5	south_shelf
chr8	17486033	PDGFRL	78.5998	3.10619	49.7024	5.99932	8.22856e-06	0.0173038	exon	InterCpgi
chrX	21966025	SMS	54.6365	3.61897	75.0488	3.2839	8.21291e-06	0.0173038	intron	InterCpgi
chr12	114397093	RBM19	77.6127	2.98368	42.6969	5.87467	8.29152e-06	0.0174041	exon	InterCpgi
chr1	28709024	PHACTR4	13.9424	5.01862	54.4909	6.83998	8.29389e-06	0.0174041	utr5	InterCpgi
chr16	89035715	CBFA2T3	27.8057	3.46988	61.7262	8.96072	8.29953e-06	0.0174041	intron	south_shore
chr11	126020421	-	20.5244	2.81919	2.98036	2.05122	8.35745e-06	0.0174939	intergenic	InterCpgi
chr13	114835621	RASA3	34.6401	3.72495	12.6935	2.12172	8.35099e-06	0.0174939	intron	north_shore
chr21	9968620	LOC100132288	24.6645	1.60468	34.3012	4.13885	8.37364e-06	0.0175119	promoter	CpG_Island
chr10	134567300	INPP5A	99.5536	0.446429	83.5775	1.78472	8.43127e-06	0.0175907	intron	south_shore
chr3	62838136	CADPS	71.3	2.55725	85.4381	1.14317	8.44173e-06	0.0175907	intron	InterCpgi
chr6	41958713	CCND3	20.9471	3.60281	3.04487	1.98226	8.43592e-06	0.0175907	utr5	InterCpgi
chrX	70587613	BCYRN1	13.419	1.82079	35.6547	6.9901	8.42309e-06	0.0175907	intron	south_shore
chrX	70587613	TAF1	13.419	1.82079	35.6547	6.9901	8.42309e-06	0.0175907	intron	south_shore
chr12	89285227	-	67.0565	2.63212	43.213	4.9443	8.45298e-06	0.0175983	intergenic	InterCpgi
chr2	223165753	CCDC140	46.3206	5.04261	73.9087	2.48016	8.48676e-06	0.0176528	utr5	south_shore
chr2	223165753	PAX3	46.3206	5.04261	73.9087	2.48016	8.48676e-06	0.0176528	utr5	south_shore
chr17	80290906	SECTM1	5.72161	1.18925	22.6856	2.47781	8.51135e-06	0.0176881	utr5	north_shore
chr22	43266257	PACSIN2	54.9261	3.51479	81.8317	7.77341	8.55507e-06	0.017747	utr3	CpG_Island
chr7	150653107	KCNH2	11.547	3.6787	0	0	8.55493e-06	0.017747	promoter	south_shore
chr10	134809455	-	18.7298	4.67046	0	0	8.62458e-06	0.0177872	intergenic	south_shelf
chr17	78222264	SLC26A11	29.9473	2.56879	58.6572	8.77412	8.6388e-06	0.0177872	intron	InterCpgi
chr18	19751623	GATA6	10.7329	2.39463	0	0	8.59601e-06	0.0177872	exon	CpG_Island
chr19	12838536	TNPO2	100	0	87.6873	5.77816	8.64355e-06	0.0177872	intergenic	south_shelf
chr19	38738214	-	57.9345	2.88513	33.2639	3.48313	8.59334e-06	0.0177872	intergenic	InterCpgi
chr5	128920975	ADAMTS19	98.7641	0.806851	86.9052	2.46226	8.62621e-06	0.0177872	intron	InterCpgi
chr7	1538481	INTS1	40.3585	5.89848	74.0984	7.23563	8.6084e-06	0.0177872	exon	south_shore
chr7	45853803	-	24.6582	5.22845	67.3306	6.37126	8.63655e-06	0.0177872	intergenic	InterCpgi
chrX	47078563	CDK16	0.3861	0.3861	13.08	5.74846	8.60327e-06	0.0177872	utr5	CpG_Island
chr13	110433998	IRS2	81.2755	4.32371	100	0	8.6528e-06	0.0177904	intron	north_shore
chr15	65593402	-	79.8139	5.68949	44.2053	5.05801	8.68169e-06	0.0178023	intergenic	north_shore
chr16	3723408	TRAP1	86.608	1.91589	66.335	2.68992	8.67452e-06	0.0178023	intron	north_shore
chr5	178702783	ADAMTS2	25.7263	3.24853	54.818	3.99701	8.67836e-06	0.0178023	intron	InterCpgi
chr2	224746803	WDFY1	55.1024	2.16258	36.4448	4.55283	8.79872e-06	0.0180104	intron	InterCpgi
chr8	11626650	NEIL2	11.5731	4.38205	36.9172	6.71713	8.7922e-06	0.0180104	intergenic	north_shore
chr11	25965717	-	57.0382	4.63338	23.7073	2.83233	8.81903e-06	0.0180201	intergenic	InterCpgi
chr4	6660489	-	0	0	10.7415	4.00831	8.81298e-06	0.0180201	intergenic	CpG_Island
chr22	37573007	-	33.3966	3.70618	58.3195	3.56689	8.83783e-06	0.0180267	intergenic	InterCpgi
chr4	144011752	-	100	0	90.2619	3.72533	8.83322e-06	0.0180267	intergenic	InterCpgi
chr1	205263699	-	6.54979	0.840388	16.0548	2.04907	8.87303e-06	0.0180826	intergenic	InterCpgi
chr9	136101253	-	45.8712	4.2535	15.9091	6.28194	8.88712e-06	0.0180954	intergenic	south_shore
chr5	138728540	LOC389333	3.829	1.26652	22.9765	7.92506	8.90588e-06	0.0181176	exon	CpG_Island
chr5	138728540	MZB1	3.829	1.26652	22.9765	7.92506	8.90588e-06	0.0181176	exon	CpG_Island
chr8	144203546	-	85.7396	2.43091	55.302	9.36487	8.92616e-06	0.018142	intergenic	InterCpgi
chr8	37822919	ADRB3	7.29348	1.90404	0	0	8.93355e-06	0.018142	exon	CpG_Island
chr10	8099787	FLJ45983	12.7556	1.69171	0	0	8.95325e-06	0.0181594	intron	south_shore
chr10	8099787	GATA3	12.7556	1.69171	0	0	8.95325e-06	0.0181594	intron	south_shore
chr7	143778223	-	87.5341	2.13407	58.1976	10.5366	8.9578e-06	0.0181594	intergenic	InterCpgi
chr22	28378724	TTC28-AS1	60.1206	3.0383	80.5914	5.51534	8.97484e-06	0.018178	exon	InterCpgi
chr22	28378724	TTC28	60.1206	3.0383	80.5914	5.51534	8.97484e-06	0.018178	exon	InterCpgi
chr14	50122802	POLE2	96.5711	1.68075	75.3577	2.82151	9.00217e-06	0.0182016	intron	InterCpgi
chr18	40375297	RIT2	100	0	78.9286	2.55051	8.99658e-06	0.0182016	utr3	InterCpgi
chr12	117489390	TESC	26.2958	3.59742	62.0273	8.1009	9.05039e-06	0.0182527	intron	InterCpgi
chr17	37265501	PLXDC1	62.9362	5.8466	33.6823	4.6173	9.05353e-06	0.0182527	exon	InterCpgi
chr7	156807554	MNX1	14.1994	2.19685	35.6881	3.26369	9.05902e-06	0.0182527	intergenic	south_shelf
chr7	2019262	MAD1L1	21.4555	2.22268	6.45634	1.616	9.05638e-06	0.0182527	intron	north_shore
chr2	232480091	-	26.3305	3.77503	44.7181	4.90713	9.09487e-06	0.0182931	intergenic	south_shore
chr6	4482805	-	61.7731	2.00849	37.5919	3.75974	9.09264e-06	0.0182931	intergenic	InterCpgi
chr1	169851368	SCYL3	53.1449	4.7486	82.7362	4.27827	9.14376e-06	0.0183755	intron	InterCpgi
chr1	35352709	DLGAP3	59.9189	1.58002	36.4167	5.52443	9.16018e-06	0.0183823	intron	south_shore
chr7	9766682	-	97.8765	1.07775	86.0402	4.79211	9.16302e-06	0.0183823	intergenic	south_shore
chr2	7571158	-	1.7381	1.19736	15.4464	5.63444	9.2493e-06	0.0185393	intergenic	CpG_Island
chr3	19911397	-	69.2577	4.10614	89.5833	4.58894	9.2673e-06	0.0185452	intergenic	InterCpgi
chr9	137186224	-	15.6027	2.04271	32.8998	1.50881	9.26827e-06	0.0185452	intergenic	InterCpgi
chr13	24155574	TNFRSF19	96.1738	1.45846	73.7594	10.2279	9.2935e-06	0.0185796	utr5	south_shore
chr21	45138490	PDXK	2.96404	1.53999	15.625	3.17602	9.30357e-06	0.0185837	promoter	CpG_Island
chr16	33963667	-	23.9039	1.73063	36.2547	2.43493	9.31679e-06	0.0185941	promoter	south_shore
chr9	101402106	GABBR2	17.9762	2.08112	2.77778	2.77778	9.34963e-06	0.0186436	intron	InterCpgi
chr1	21306392	EIF4G3	51.5791	5.58119	84.8684	6.08923	9.40207e-06	0.018732	intron	InterCpgi
chr1	41967435	-	32.4873	5.63701	6.25235	2.16687	9.42341e-06	0.0187383	intergenic	InterCpgi
chr16	22301314	-	11.4438	2.93228	36.1921	7.67928	9.42953e-06	0.0187383	intergenic	InterCpgi
chr1	93502748	-	99.4286	0.571429	88.4957	2.25624	9.42644e-06	0.0187383	intergenic	InterCpgi
chr5	178016742	COL23A1	19.0025	6.37497	46.9697	4.67001	9.44348e-06	0.01875	intron	CpG_Island
chr1	32226325	MIR4254	23.0948	2.36335	42.8571	15.1523	9.45968e-06	0.018766	promoter	CpG_Island
chr1	32226325	BAI2	23.0948	2.36335	42.8571	15.1523	9.45968e-06	0.018766	promoter	CpG_Island
chr11	70465013	SHANK2	64.8904	3.42988	82.0304	5.49488	9.49178e-06	0.0187975	intron	InterCpgi
chr17	54673600	-	1.70307	1.25088	19.5388	4.12194	9.48784e-06	0.0187975	intergenic	south_shore
chr2	11802128	NTSR2	45.9382	3.37837	22.2999	2.74902	9.50905e-06	0.0188156	exon	InterCpgi
chr10	80723694	LOC283050	47.2345	1.5552	68.4446	2.14955	9.56159e-06	0.0188547	intergenic	InterCpgi
chr11	65321172	LTBP3	24.4709	2.70686	64.1992	9.65487	9.5646e-06	0.0188547	exon	north_shore
chr19	23472753	-	100	0	92.5754	2.63916	9.55336e-06	0.0188547	intergenic	InterCpgi
chr7	50595719	DDC	90.8263	1.79806	66.9508	7.74955	9.54314e-06	0.0188547	intron	InterCpgi
chr7	50595719	LOC100129427	90.8263	1.79806	66.9508	7.74955	9.54314e-06	0.0188547	intron	InterCpgi
chr8	877009	-	41.0714	5.78127	8.52273	5.8956	9.56955e-06	0.0188547	intergenic	InterCpgi
chr15	28073386	OCA2	86.8532	2.35451	63.5025	8.03523	9.58768e-06	0.0188744	intron	InterCpgi
chr10	118368996	-	3.65099	1.11557	16.1281	2.39458	9.60172e-06	0.018886	intergenic	CpG_Island
chr10	126698647	CTBP2	55.6435	3.00189	30.9848	1.46573	9.64782e-06	0.0189472	intron	InterCpgi
chr15	66364259	MEGF11	61.583	3.87252	88.114	3.01868	9.67378e-06	0.0189472	intron	InterCpgi
chr6	112503029	LAMA4	98.2073	1.16035	80.1143	5.68195	9.66079e-06	0.0189472	intron	InterCpgi
chr6	30984591	PBMUCL1	40.7357	4.8941	10.5403	4.03563	9.66873e-06	0.0189472	intron	InterCpgi
chr9	139915916	ABCA2	99.4898	0.510204	92.0895	1.58358	9.65775e-06	0.0189472	exon	south_shore
chr18	77608799	-	50.2041	5.54147	14.8352	6.63145	9.68806e-06	0.0189591	intergenic	CpG_Island
chr9	137142508	-	39.3077	9.26518	86.6961	6.79299	9.71256e-06	0.018991	intergenic	InterCpgi
chr9	136282953	REXO4	1.61039	1.09912	19.8737	3.94729	9.72264e-06	0.0189947	utr5	CpG_Island
chr9	136282953	ADAMTS13	1.61039	1.09912	19.8737	3.94729	9.72264e-06	0.0189947	utr5	CpG_Island
chr12	133675923	ZNF140	71.5193	2.49549	48.9338	5.65768	9.77901e-06	0.0190246	utr5	InterCpgi
chr14	60976652	SIX6	21.0295	2.18859	33.9391	9.77181	9.77309e-06	0.0190246	exon	CpG_Island
chr16	89912454	SPIRE2	96.5803	1.8248	63.3761	11.8715	9.75502e-06	0.0190246	intron	InterCpgi
chr20	20347721	INSM1	2.63485	1.01166	10.5171	4.62163	9.77042e-06	0.0190246	promoter	CpG_Island
chr22	38610847	MAFF	0	0	17.5	5.95119	9.75904e-06	0.0190246	exon	south_shore
chr19	4099308	MAP2K2	38.2149	5.87982	71.2798	6.04606	9.78878e-06	0.0190276	exon	north_shore
chr11	2405195	CD81	30.5952	4.36706	12.1836	2.09802	9.79894e-06	0.0190313	utr5	north_shore
chr15	52248509	LEO1	44.8487	4.01999	17.5663	4.5672	9.8212e-06	0.0190561	intron	InterCpgi
chr4	187451	-	42.3243	1.69145	64.3311	4.11032	9.82816e-06	0.0190561	intergenic	InterCpgi
chr14	103589354	TNFAIP2	2.39614	1.5382	20.3267	8.81729	9.86357e-06	0.0191088	intergenic	CpG_Island
chr1	21379971	EIF4G3	16.0658	3.78112	1.31579	1.31579	9.88441e-06	0.019123	utr5	InterCpgi
chr16	926115	LMF1	100	0	90.8422	3.54446	9.88743e-06	0.019123	intron	south_shore
chr14	101175949	-	5.30612	2.71456	30.5409	4.03045	9.92604e-06	0.0191816	intergenic	CpG_Island
chr9	136597621	SARDH	42.4159	2.81501	63.8327	3.96982	9.94076e-06	0.0191941	exon	InterCpgi
chr11	118483314	PHLDB1	55.102	7.8182	93.75	3.60844	9.95688e-06	0.0192092	utr5	south_shore
chr10	11784775	ECHDC3	9.60759	2.11841	0	0	1.00586e-05	0.0193731	intron	CpG_Island
chr2	220349509	SPEG	7.80123	1.68691	36.1532	10.733	1.00524e-05	0.0193731	exon	CpG_Island
chr11	70851870	SHANK2	10.8017	2.13818	43.0625	5.25544	1.01084e-05	0.0194205	intron	InterCpgi
chr17	80258947	-	12.9496	1.67564	0	0	1.01042e-05	0.0194205	intergenic	InterCpgi
chr3	126703790	PLXNA1	69.8028	3.95725	93.3271	2.67018	1.00922e-05	0.0194205	intergenic	south_shore
chr13	99083677	FARP1	58.7264	4.42032	30.004	2.72462	1.01458e-05	0.0194762	intron	InterCpgi
chr3	105854823	-	27.4285	5.26812	4.21022	2.47216	1.01573e-05	0.0194822	intergenic	InterCpgi
chr22	48907703	FAM19A5	56.4323	4.59788	86.6046	4.6414	1.01662e-05	0.0194831	intron	InterCpgi
chr1	166871209	-	96.8719	1.4877	78.5402	5.59378	1.01912e-05	0.019502	intergenic	InterCpgi
chr7	149463147	ZNF467	18.8899	3.5145	52.6948	5.06559	1.01929e-05	0.019502	exon	CpG_Island
chr22	38478787	SLC16A8	40.6188	5.5147	72.1034	7.74658	1.02178e-05	0.0195307	exon	CpG_Island
chr5	38861921	OSMR	100	0	87.2114	1.67749	1.02248e-05	0.0195307	utr5	InterCpgi
chr20	62689039	TCEA2	8.81949	1.87957	28.1219	4.48821	1.02421e-05	0.0195477	utr5	south_shore
chr11	117310250	DSCAML1	68.7148	3.71616	87.0578	2.49675	1.02619e-05	0.0195694	intron	InterCpgi
chr7	150864061	GBX1	15.8381	3.98755	54.0953	7.74858	1.03053e-05	0.0196273	intron	CpG_Island
chrX	21858048	MBTPS2	16.5661	3.20367	0	0	1.03093e-05	0.0196273	intron	CpG_Island
chr14	31886828	-	100	0	93.0184	4.5686	1.03389e-05	0.0196399	utr5	north_shelf
chr17	74018730	EVPL	76.4228	1.99679	59.5183	4.73171	1.03285e-05	0.0196399	intron	south_shore
chr8	6899070	-	72.1002	3.1693	85.7179	4.57935	1.03413e-05	0.0196399	intergenic	InterCpgi
chr11	1087300	MUC2	36.5266	5.22592	77.8265	8.52618	1.03537e-05	0.0196472	intron	south_shelf
chr1	3037421	PRDM16	71.9496	3.02623	89.9671	2.99669	1.03849e-05	0.019688	intron	north_shore
chr22	44778919	-	43.1169	6.79877	81.8452	2.34975	1.03921e-05	0.019688	intergenic	InterCpgi
chr22	42063333	-	41.6468	3.74674	81.1184	10.8388	1.04098e-05	0.0197052	intergenic	south_shore
chr12	80396387	-	100	0	82.8926	7.8221	1.04278e-05	0.019718	intergenic	InterCpgi
chr12	98084655	-	84.9914	2.7122	100	0	1.04336e-05	0.019718	intergenic	InterCpgi
chr12	6810346	C12orf53	18.0968	3.79372	3.86473	2.62386	1.04432e-05	0.0197182	promoter	south_shore
chr1	89829872	GBP6	52.9506	9.89704	3.57143	3.57143	1.04507e-05	0.0197182	utr5	InterCpgi
chr9	139244191	GPSM1	72.8452	5.77825	37.3577	7.24066	1.04676e-05	0.0197339	exon	InterCpgi
chr11	39463809	-	13.8458	2.40822	44.2866	10.5624	1.04983e-05	0.0197414	intergenic	InterCpgi
chr15	99194616	IGF1R	31.8133	6.30779	63.2885	6.0769	1.05056e-05	0.0197414	promoter	south_shore
chr20	34555297	C20orf152	83.1688	1.65719	96.1842	2.40589	1.04928e-05	0.0197414	promoter	InterCpgi
chr5	169931507	KCNIP1	0	0	8.09452	3.32491	1.04811e-05	0.0197414	utr5	south_shore
chr11	36250849	LDLRAD3	69.2718	3.93976	94.0957	2.41531	1.05619e-05	0.019799	exon	InterCpgi
chr17	46607805	HOXB1	14.723	2.91086	40.214	4.99798	1.05559e-05	0.019799	exon	CpG_Island
chr6	164283232	-	62.5077	2.13579	49.1939	4.90656	1.05509e-05	0.019799	intergenic	InterCpgi
chr19	2717235	DIRAS1	85.4444	1.7235	97.4571	1.54316	1.06473e-05	0.0199414	exon	CpG_Island
chr7	492295	-	0.453972	0.293244	6.89854	2.51775	1.06551e-05	0.0199414	intergenic	CpG_Island
chr10	72200743	NODAL	2.28153	0.898051	12.4455	3.23978	1.06824e-05	0.0199603	intron	CpG_Island
chr1	15382607	KAZ	90.7941	3.76778	49.5032	13.0614	1.0676e-05	0.0199603	exon	InterCpgi
chr2	200327318	SATB2	5.26638	1.34596	17.0308	2.59717	1.07231e-05	0.0200201	utr5	CpG_Island
chr11	45680322	CHST1	18.7928	2.75943	41.1986	2.60845	1.07435e-05	0.0200271	utr5	InterCpgi
chr16	60255824	-	81.3864	6.54451	25.3788	10.6668	1.07442e-05	0.0200271	intergenic	InterCpgi
chr1	249237692	-	96.0214	2.13034	78.684	6.08344	1.08163e-05	0.0201453	intergenic	InterCpgi
chr3	126703209	PLXNA1	32.4525	4.23404	68.3217	7.97406	1.09173e-05	0.0203172	intergenic	CpG_Island
chr7	42004771	GLI3	80.88	2.34174	53.5783	5.38808	1.09334e-05	0.0203307	exon	north_shore
chr2	83404218	-	100	0	91.8981	3.40994	1.09699e-05	0.0203823	intergenic	InterCpgi
chr16	54471509	-	35.0323	5.12337	14.3561	2.89457	1.09966e-05	0.0203991	intergenic	InterCpgi
chr21	38077394	SIM2	7.18825	1.47109	27.7632	8.65775	1.09962e-05	0.0203991	intron	CpG_Island
chr10	133058539	TCERG1L	62.0193	3.85952	82.89	2.15721	1.10344e-05	0.0204528	exon	CpG_Island
chr21	46854891	COL18A1	39.2251	2.52466	16.7485	4.64288	1.1059e-05	0.0204819	intron	InterCpgi
chr6	99295891	-	0	0	6.37284	2.24379	1.10959e-05	0.020534	intergenic	CpG_Island
chr11	7687160	CYB5R2	3.94611	1.2008	14.6825	5.31746	1.11365e-05	0.0205585	exon	InterCpgi
chr1	198953122	-	45.9452	5.76952	85.0146	5.13624	1.11233e-05	0.0205585	intergenic	InterCpgi
chr13	100422502	CLYBL	67.6936	3.63691	44.8251	5.52764	1.11302e-05	0.0205585	intron	InterCpgi
chr15	67017311	SMAD6	50.7098	3.02142	67.8639	2.08413	1.11447e-05	0.0205585	intron	InterCpgi
chr1	21920341	-	74.1737	2.95317	93.6484	2.49083	1.12352e-05	0.0205942	intergenic	InterCpgi
chr19	2290986	LINGO3	8.15489	1.67326	23.766	4.11185	1.12127e-05	0.0205942	exon	CpG_Island
chr20	45946318	ZMYND8	0	0	6.68164	2.23691	1.12297e-05	0.0205942	utr5	InterCpgi
chr20	45946318	LOC100131496	0	0	6.68164	2.23691	1.12297e-05	0.0205942	utr5	InterCpgi
chr3	147111150	ZIC4	9.77668	1.99174	32.1405	6.90175	1.11831e-05	0.0205942	promoter	CpG_Island
chr4	73944063	ANKRD17	67.101	1.63144	42.0255	7.32115	1.12223e-05	0.0205942	intron	InterCpgi
chr6	170475516	-	57.6028	3.45225	25.2692	5.762	1.11973e-05	0.0205942	intergenic	CpG_Island
chr6	34535935	-	32.9237	3.63544	55.287	2.81496	1.12049e-05	0.0205942	intergenic	InterCpgi
chr8	143410761	TSNARE1	26.9772	2.53907	66.7758	11.7153	1.11893e-05	0.0205942	intron	south_shelf
chr7	129426588	-	97.4989	1.04506	85.4863	4.03091	1.12601e-05	0.0206235	intergenic	south_shore
chrX	152953171	SLC6A8	17.81	1.57274	41.3722	7.41726	1.12823e-05	0.0206478	promoter	InterCpgi
chr10	135084566	ADAM8	31.4964	5.47525	1.78571	1.78571	1.12986e-05	0.0206613	exon	south_shore
chr1	2405502	PLCH2	31.7118	4.21364	64.7619	3.07994	1.13134e-05	0.020672	intron	InterCpgi
chr10	22766465	-	62.6006	4.27374	90.9217	1.60909	1.13366e-05	0.0206817	intergenic	CpG_Island
chr19	42729795	ZNF526	95.0038	1.68922	75.9571	6.78115	1.1336e-05	0.0206817	exon	CpG_Island
chr4	8870018	HMX1	6.94062	1.95026	29.5788	2.44067	1.136e-05	0.0207081	exon	CpG_Island
chr18	42643764	SETBP1	87.5904	3.14309	100	0	1.14123e-05	0.0207871	utr3	CpG_Island
chr17	27893393	ABHD15	21.0128	2.99759	3.64721	2.11198	1.14347e-05	0.0208104	exon	CpG_Island
chr17	27893393	TP53I13	21.0128	2.99759	3.64721	2.11198	1.14347e-05	0.0208104	exon	CpG_Island
chr2	132587878	-	60.0917	5.49037	29.6482	4.7455	1.14431e-05	0.0208104	intergenic	CpG_Island
chr1	28428518	-	72.3586	2.0312	50.9422	6.65221	1.14675e-05	0.0208221	intergenic	InterCpgi
chr7	151572437	PRKAG2	2.87266	0.934824	13.748	6.61518	1.146e-05	0.0208221	intron	north_shore
chr19	18539829	SSBP4	8.05372	3.50002	20.5424	2.37669	1.14971e-05	0.0208595	intron	CpG_Island
chr4	6974125	TBC1D14	97.9592	2.04082	76.9444	3.61111	1.15113e-05	0.0208689	intron	InterCpgi
chr5	173738844	-	0	0	11.0581	3.9152	1.15223e-05	0.0208725	intergenic	CpG_Island
chr3	46506109	LTF	20.6349	4.52082	54.335	3.95453	1.15637e-05	0.0209312	promoter	north_shore
chr1	215568026	-	40.0143	8.28786	0	0	1.1617e-05	0.0209922	intergenic	InterCpgi
chr2	133014852	MIR663B	44.2378	3.37509	22.871	4.60968	1.16246e-05	0.0209922	promoter	CpG_Island
chr2	133014852	ANKRD30BL	44.2378	3.37509	22.871	4.60968	1.16246e-05	0.0209922	promoter	CpG_Island
chr9	136282926	REXO4	1.59184	1.08324	23.1932	5.14782	1.16225e-05	0.0209922	utr5	CpG_Island
chr9	136282926	ADAMTS13	1.59184	1.08324	23.1932	5.14782	1.16225e-05	0.0209922	utr5	CpG_Island
chr20	30072072	REM1	56.9559	7.17412	31.4021	10.2777	1.1657e-05	0.0210342	exon	CpG_Island
chr20	30072072	NCRNA00028	56.9559	7.17412	31.4021	10.2777	1.1657e-05	0.0210342	exon	CpG_Island
chr17	59473157	TBX2	37.2134	1.82641	53.0013	3.8015	1.16701e-05	0.0210415	intergenic	CpG_Island
chr17	19805827	-	48.1343	2.26197	73.6806	6.2581	1.17727e-05	0.0212099	intergenic	InterCpgi
chr20	61467759	COL9A3	23.6618	3.31586	51.0263	4.86966	1.1815e-05	0.0212575	intron	CpG_Island
chr22	44833260	-	21.4148	3.07764	50.5182	10.2705	1.18188e-05	0.0212575	intergenic	InterCpgi
chr22	50487406	TTLL8	82.7826	2.19222	95.5203	0.528428	1.18358e-05	0.0212575	intergenic	south_shelf
chr6	107390053	BEND3	93.1454	1.14835	100	0	1.18306e-05	0.0212575	exon	CpG_Island
chr22	19747181	TBX1	32.5606	3.91635	62.039	4.16218	1.18488e-05	0.0212644	exon	south_shore
chr15	41803955	LTK	3.74443	1.51119	21.6237	7.83752	1.189e-05	0.0213006	intron	CpG_Island
chr16	70322172	AARS	52.1733	4.99314	83.9674	6.10658	1.19058e-05	0.0213006	utr5	north_shore
chr7	171177	-	33.9103	5.17258	63.0021	3.52143	1.18911e-05	0.0213006	intergenic	InterCpgi
chr9	130167061	SLC2A8	32.6261	2.96159	6.06579	3.18232	1.18969e-05	0.0213006	intron	CpG_Island
chr1	4520817	-	49.8786	2.49898	65.0877	3.14222	1.19698e-05	0.0213986	intergenic	InterCpgi
chrX	112098437	-	90.8201	2.48779	70.7856	11.6716	1.2006e-05	0.0214467	intergenic	InterCpgi
chr12	115010435	-	96.8979	0.979944	83.7618	4.71173	1.20969e-05	0.0215289	intergenic	InterCpgi
chr17	1015136	ABR	53.3532	5.09811	74.7052	4.36774	1.21038e-05	0.0215289	intron	south_shelf
chr17	75405794	2020-09-09	20.8704	3.38207	53.7769	6.32499	1.21078e-05	0.0215289	intron	InterCpgi
chr19	3688666	PIP5K1C	31.9084	1.56242	44.4442	4.37587	1.20863e-05	0.0215289	intron	south_shore
chr19	4172279	CREB3L3	24.4245	2.50213	41.2304	3.16997	1.20639e-05	0.0215289	utr3	north_shore
chr2	71127106	VAX2	8.14039	1.28528	18.4587	1.52921	1.21068e-05	0.0215289	promoter	CpG_Island
chr1	50647646	ELAVL4	42.4976	1.89047	56.1732	1.95562	1.21549e-05	0.0215398	intron	InterCpgi
chr2	121933663	-	88.7978	2.33068	100	0	1.21526e-05	0.0215398	intergenic	InterCpgi
chr2	134867195	-	68.8256	6.12352	19.9378	10.4429	1.21462e-05	0.0215398	intergenic	InterCpgi
chr9	140263838	EXD3	79.4652	2.47795	94.5617	4.33044	1.21383e-05	0.0215398	intron	south_shore
chrX	120936655	-	92.6072	2.43697	63.6742	3.21434	1.21605e-05	0.0215398	intergenic	InterCpgi
chr17	68314756	-	69.5099	3.37699	90.2349	3.72123	1.21815e-05	0.0215605	intergenic	InterCpgi
chr12	133144799	FBRSL1	45.0382	3.16049	72.8222	7.21957	1.21929e-05	0.0215642	intron	north_shore
chr17	1845330	RTN4RL1	35.1455	2.97934	72.5198	10.3446	1.22273e-05	0.0216085	intron	InterCpgi
chr1	906471	PLEKHN1	8.0552	2.01288	0	0	1.22486e-05	0.0216296	exon	CpG_Island
chr15	78795904	AGPHD1	20.5161	3.53739	49.5498	6.58496	1.23036e-05	0.0217103	intergenic	north_shelf
chr5	56144945	MAP3K1	100	0	91.5174	3.26858	1.23182e-05	0.0217195	intron	InterCpgi
chr1	155161680	MIR92B	89.1554	2.64335	100	0	1.23445e-05	0.0217222	intron	north_shore
chr1	155161680	MUC1	89.1554	2.64335	100	0	1.23445e-05	0.0217222	intron	north_shore
chr17	1957146	MIR212	6.03018	1.15624	21.448	3.78778	1.23915e-05	0.0217222	intergenic	CpG_Island
chr17	1957146	HIC1	6.03018	1.15624	21.448	3.78778	1.23915e-05	0.0217222	intergenic	CpG_Island
chr17	1957146	MIR132	6.03018	1.15624	21.448	3.78778	1.23915e-05	0.0217222	intergenic	CpG_Island
chr17	44847186	WNT3	0.664452	0.664452	11.2623	1.80403	1.23948e-05	0.0217222	exon	CpG_Island
chr2	204634016	-	93.3298	2.07796	77.9589	3.90413	1.23802e-05	0.0217222	intergenic	InterCpgi
chr8	61835703	-	56.8685	4.46539	85.6591	5.32342	1.2363e-05	0.0217222	intergenic	CpG_Island
chr9	130700867	DPM2	25.9005	3.89191	52.6467	2.53244	1.23447e-05	0.0217222	promoter	south_shore
chrX	125605791	-	89.4532	1.8432	79.1186	7.49235	1.23542e-05	0.0217222	intergenic	InterCpgi
chrX	135229884	FHL1	37.2814	4.4941	19.2354	4.74632	1.23689e-05	0.0217222	utr5	CpG_Island
chr4	107242677	TBCK	94.9134	2.67953	69.0099	2.05069	1.24218e-05	0.02174	utr5	InterCpgi
chr4	107242677	AIMP1	94.9134	2.67953	69.0099	2.05069	1.24218e-05	0.02174	utr5	InterCpgi
chr7	2802289	GNA12	55.5669	6.91402	93.1429	2.42437	1.24238e-05	0.02174	exon	north_shore
chr10	99206560	EXOSC1	68.5146	3.00973	83.479	8.0763	1.24403e-05	0.0217525	promoter	south_shore
chr10	99206560	ZDHHC16	68.5146	3.00973	83.479	8.0763	1.24403e-05	0.0217525	promoter	south_shore
chr16	32298037	-	39.6492	4.25694	66.9121	7.09761	1.24691e-05	0.0217864	intergenic	north_shelf
chr19	1855483	KLF16	1.57313	1.02835	10.989	3.67215	1.24976e-05	0.0218197	intron	south_shore
chr1	43423802	FLJ32224	0	0	10.1974	3.48643	1.25273e-05	0.0218551	intron	CpG_Island
chr1	43423802	SLC2A1	0	0	10.1974	3.48643	1.25273e-05	0.0218551	intron	CpG_Island
chr7	211797	FAM20C	98.712	0.933326	89.6389	1.84445	1.2592e-05	0.0219514	intron	InterCpgi
chr2	241297954	-	52.0066	5.26375	73.1259	3.82026	1.26157e-05	0.0219644	intergenic	south_shelf
chrX	71088911	-	24.093	3.0255	51.6334	8.55715	1.26184e-05	0.0219644	intergenic	north_shelf
chr16	1179082	-	52.3583	3.42162	21.25	6.8423	1.26777e-05	0.0220014	intergenic	north_shore
chr17	7318115	NLGN2	0.492611	0.492611	10.3495	0.761649	1.26692e-05	0.0220014	exon	north_shelf
chr6	52126101	-	50.9379	4.84942	79.6807	8.53612	1.26538e-05	0.0220014	intergenic	InterCpgi
chr9	69381716	ANKRD20A4	0	0	3.64826	1.10484	1.26766e-05	0.0220014	promoter	CpG_Island
chr3	192429147	FGF12	77.4717	5.15953	100	0	1.27168e-05	0.0220527	intron	InterCpgi
chr5	1108402	SLC12A7	65.6517	4.05949	88.8685	4.14698	1.27263e-05	0.0220527	intron	north_shore
chr6	27783084	HIST1H2AJ	0.328407	0.328407	6.9268	2.58637	1.27697e-05	0.0221086	promoter	south_shore
chr6	27783084	HIST1H2BM	0.328407	0.328407	6.9268	2.58637	1.27697e-05	0.0221086	promoter	south_shore
chr7	109310765	-	67.237	3.797	38.058	7.15936	1.27776e-05	0.0221086	intergenic	InterCpgi
chr19	4977772	KDM4B	16.7932	1.88596	41.8211	5.91654	1.28096e-05	0.0221473	utr5	InterCpgi
chr7	6066006	EIF2AK1	53.726	5.31004	20.7468	7.62453	1.28191e-05	0.0221473	intron	InterCpgi
chr1	21518250	-	70.9361	1.87064	78.991	2.33598	1.28643e-05	0.0221922	intergenic	InterCpgi
chr2	10183208	KLF11	18.7754	3.76938	46.5972	3.459	1.28618e-05	0.0221922	promoter	CpG_Island
chr1	32226304	BAI2	14.8189	2.65794	39.7817	8.31501	1.28763e-05	0.0221963	promoter	CpG_Island
chr1	32226304	MIR4254	14.8189	2.65794	39.7817	8.31501	1.28763e-05	0.0221963	promoter	CpG_Island
chr2	222243226	-	49.2882	2.80592	23.2768	6.62336	1.28917e-05	0.0222063	intergenic	InterCpgi
chr11	35441387	SLC1A2	0	0	3.56185	1.43751	1.29236e-05	0.0222447	promoter	CpG_Island
chr2	114082118	LOC440839	16.3407	2.61003	37.0949	3.33094	1.29717e-05	0.0222944	intergenic	InterCpgi
chr22	23794978	-	47.4417	5.50554	81.8317	6.3706	1.29704e-05	0.0222944	intergenic	InterCpgi
chr14	45314109	-	96.6667	2.41249	84.1923	5.37192	1.29895e-05	0.0223085	intergenic	InterCpgi
chr17	26092515	NOS2	89.6338	2.57716	100	0	1.30343e-05	0.022325	intron	InterCpgi
chr19	616590	HCN2	22.6905	3.80839	47.4403	2.73589	1.30233e-05	0.022325	utr3	CpG_Island
chr20	61444088	OGFR	36.454	2.97487	59.8129	4.02839	1.30377e-05	0.022325	exon	south_shore
chr20	61444088	COL9A3	36.454	2.97487	59.8129	4.02839	1.30377e-05	0.022325	exon	south_shore
chr9	38488164	-	25.8171	4.43765	5	5	1.30172e-05	0.022325	intergenic	CpG_Island
chr1	25907580	-	14.3421	2.80114	38.4151	3.71807	1.30607e-05	0.0223313	intergenic	InterCpgi
chr19	45351297	PVRL2	8.65338	1.58646	19.5658	1.80145	1.30535e-05	0.0223313	intron	south_shore
chr8	143591861	BAI1	0	0	16.7798	7.32401	1.30768e-05	0.0223424	intron	CpG_Island
chr1	6174205	CHD5	66.0546	2.05798	51.4239	3.85682	1.31029e-05	0.0223704	intron	InterCpgi
chr1	19586928	-	81.8401	2.05344	96.6575	1.37573	1.31145e-05	0.0223736	intergenic	InterCpgi
chr12	124912703	NCOR2	11.9731	1.95805	34.7078	7.35142	1.31241e-05	0.0223736	intron	south_shore
chr12	49726705	C1QL4	43.9964	4.56552	16.6158	6.21833	1.31406e-05	0.0223853	utr3	CpG_Island
chr17	44961502	-	21.0346	4.03591	3.03309	1.75276	1.31779e-05	0.0224323	intergenic	InterCpgi
chr9	74652812	-	44.7872	2.82649	61.9139	2.94435	1.32009e-05	0.0224549	intergenic	InterCpgi
chr12	56222814	DNAJC14	5.00117	0.790917	19.1761	2.89147	1.33099e-05	0.0225741	utr5	north_shore
chr12	56222814	LOC440104	5.00117	0.790917	19.1761	2.89147	1.33099e-05	0.0225741	utr5	north_shore
chr20	61292754	SLCO4A1	36.924	3.78782	9.32854	3.74579	1.33034e-05	0.0225741	intron	south_shelf
chr2	71123585	VAX2	50.848	5.54128	77.3851	3.04764	1.32891e-05	0.0225741	intergenic	north_shelf
chr3	147111136	ZIC4	9.35228	1.05017	26.6135	4.46209	1.3292e-05	0.0225741	promoter	CpG_Island
chr1	1685568	NADK	43.4131	4.72824	15.7549	5.29103	1.33722e-05	0.02263	exon	CpG_Island
chr16	3021902	PAQR4	82.9492	3.52818	50.3365	4.7486	1.33539e-05	0.02263	exon	south_shore
chr4	6310746	-	9.12337	1.67698	0.819672	0.819672	1.337e-05	0.02263	intergenic	InterCpgi
chr16	81740096	CMIP	18.1282	1.25793	3.09641	2.46356	1.34453e-05	0.0227371	intron	InterCpgi
chr9	133269726	-	45.0242	1.62882	68.1681	7.79533	1.34634e-05	0.022751	intron	InterCpgi
chr5	110027872	TMEM232	96.58	1.35215	81.3757	4.65603	1.34938e-05	0.0227692	utr5	InterCpgi
chr8	128880047	PVT1	2.7381	1.87854	20.8041	9.42103	1.34897e-05	0.0227692	intergenic	InterCpgi
chr10	105344696	NEURL	30.0892	7.6409	66.3736	4.67862	1.35643e-05	0.0228548	exon	CpG_Island
chr4	25942518	-	83.3163	3.31633	100	0	1.35566e-05	0.0228548	intergenic	InterCpgi
chr2	83473328	-	62.4739	6.19646	23.1944	4.15972	1.36077e-05	0.0229113	intergenic	InterCpgi
chr1	11863389	CLCN6	9.89056	2.13447	0	0	1.36406e-05	0.02295	utr5	north_shelf
chr1	11863389	MTHFR	9.89056	2.13447	0	0	1.36406e-05	0.02295	utr5	north_shelf
chr5	10463547	ROPN1L	90.4103	1.5141	74.752	5.42768	1.36787e-05	0.0229933	intron	InterCpgi
chr6	46656272	TDRD6	15.5311	2.9773	3.04487	1.98226	1.36862e-05	0.0229933	exon	CpG_Island
chr12	125413154	-	3.66638	1.46939	24.5866	7.57616	1.37125e-05	0.0230207	intergenic	CpG_Island
chr17	61574697	ACE	90.2131	1.6373	100	0	1.37532e-05	0.0230722	exon	InterCpgi
chr6	37538747	-	39.7279	8.23663	87.5	12.5	1.37636e-05	0.023073	intergenic	InterCpgi
chr12	19538977	-	98.6111	0.909241	78.4583	5.56667	1.37967e-05	0.0231118	intergenic	InterCpgi
chr9	27060816	IFT74	97.3129	1.38902	74.2787	5.47102	1.38289e-05	0.0231489	intron	InterCpgi
chr1	210032193	-	7.38918	2.91016	37.3506	7.77006	1.385e-05	0.0231675	intergenic	InterCpgi
chrX	136011866	-	13.5399	2.02219	0	0	1.39134e-05	0.0232569	intergenic	InterCpgi
chr19	51190087	SHANK1	11.8028	2.4898	0	0	1.39424e-05	0.0232717	intron	CpG_Island
chr20	55787508	BMP7	52.1529	3.15224	78.2986	1.31074	1.39395e-05	0.0232717	intron	InterCpgi
chr19	56097251	-	0	0	6.38889	2.13365	1.39731e-05	0.0233061	intergenic	north_shore
chr6	2915336	-	0.37594	0.37594	7.64368	4.4846	1.40277e-05	0.0233804	intergenic	InterCpgi
chr9	136664141	VAV2	84.1366	2.89822	100	0	1.40429e-05	0.0233889	intron	InterCpgi
chr7	2018631	MAD1L1	97.0148	1.4654	81.3879	5.64124	1.40741e-05	0.0234239	intron	north_shore
chr11	19586238	NAV2	0.223214	0.223214	13.6515	5.29598	1.41237e-05	0.0234304	intron	InterCpgi
chr13	110664289	-	90.7778	2.64794	71.8129	1.82155	1.41033e-05	0.0234304	intergenic	InterCpgi
chr19	18060630	KCNN1	0	0	11.0417	3.77882	1.41387e-05	0.0234304	intergenic	south_shore
chr19	23434540	-	41.342	5.6137	75.8013	8.5298	1.41321e-05	0.0234304	promoter	InterCpgi
chr2	172107563	-	96.3365	1.45021	78.9841	5.34639	1.41128e-05	0.0234304	intergenic	InterCpgi
chr9	126991374	-	95.0138	2.30401	78.5224	2.8353	1.41319e-05	0.0234304	intergenic	InterCpgi
chr17	79374738	BAHCC1	41.3047	3.01867	66.4603	2.96518	1.41806e-05	0.023483	promoter	CpG_Island
chr11	75892606	-	97.6886	1.12988	76.9355	7.23469	1.4218e-05	0.0235219	intergenic	InterCpgi
chr11	8737266	ST5	1.83852	0.981538	16.3121	4.91176	1.4259e-05	0.0235219	exon	InterCpgi
chr19	4510899	PLIN4	45.0375	4.15122	72.9545	4.74503	1.42712e-05	0.0235219	exon	InterCpgi
chr20	61360095	NTSR1	62.916	2.85668	84.5079	5.98091	1.42442e-05	0.0235219	intron	InterCpgi
chr6	21737232	FLJ22536	41.3192	3.1945	61.0498	8.00437	1.42512e-05	0.0235219	intergenic	InterCpgi
chr7	52155845	-	34.8311	2.19637	60.6498	4.70318	1.42653e-05	0.0235219	intergenic	InterCpgi
chr9	128777172	-	52.6641	4.85451	27.9897	5.25855	1.42752e-05	0.0235219	intergenic	north_shore
chr14	57276039	OTX2	6.82272	1.60767	0	0	1.43345e-05	0.0235896	utr5	CpG_Island
chr14	57276039	OTX2OS1	6.82272	1.60767	0	0	1.43345e-05	0.0235896	utr5	CpG_Island
chr5	177560837	RMND5B	88.2671	2.26308	69.1667	4.9768	1.43367e-05	0.0235896	utr5	south_shelf
chrX	37566459	XK	95.4295	1.80497	77.2176	7.70371	1.43658e-05	0.0236207	intron	InterCpgi
chr2	85377449	TCF7L1	41.144	5.379	13.5685	3.84021	1.43765e-05	0.0236215	intron	InterCpgi
chr15	70383791	TLE3	76.4861	2.91007	97.1138	1.70586	1.43923e-05	0.0236307	intron	InterCpgi
chr1	16839988	-	11.643	1.44028	20.5583	1.40607	1.44328e-05	0.0236661	intergenic	north_shore
chr1	246348856	SMYD3	20.5192	2.80723	48.2956	9.25149	1.44343e-05	0.0236661	intron	InterCpgi
chr21	42256471	-	97.877	0.774141	81.6667	7.99305	1.44472e-05	0.0236706	intergenic	InterCpgi
chr2	2414899	-	22.8623	3.05644	43.5938	2.91341	1.44727e-05	0.0236956	intergenic	InterCpgi
chr3	196227871	RNF168	13.0562	2.70737	38.5516	3.13272	1.45398e-05	0.0237886	intron	north_shore
chr16	75148399	LDHD	23.1134	4.57853	1.47059	1.47059	1.45827e-05	0.0238419	intron	CpG_Island
chr11	126256487	ST3GAL4	40.1925	3.2652	51.6421	6.40659	1.46056e-05	0.0238625	utr5	InterCpgi
chr2	133014855	MIR663B	47.6803	3.87245	26.8276	4.08063	1.46455e-05	0.0239108	promoter	CpG_Island
chr2	133014855	ANKRD30BL	47.6803	3.87245	26.8276	4.08063	1.46455e-05	0.0239108	promoter	CpG_Island
chr10	1285333	ADARB2	93.1895	1.33748	80.3379	3.93041	1.46827e-05	0.0239223	intron	south_shore
chr3	52840342	ITIH3	61.3543	1.35355	80.3932	4.05267	1.46836e-05	0.0239223	exon	InterCpgi
chr9	133541512	PRDM12	4.33672	1.29367	17.2853	6.87252	1.46765e-05	0.0239223	intron	CpG_Island
chr1	1100078	MIR200A	83.5166	4.99172	100	0	1.47662e-05	0.02404	intergenic	CpG_Island
chr1	1100078	MIR200B	83.5166	4.99172	100	0	1.47662e-05	0.02404	intergenic	CpG_Island
chr1	1100078	MIR429	83.5166	4.99172	100	0	1.47662e-05	0.02404	intergenic	CpG_Island
chr3	184071548	CLCN2	98.1481	1.21232	85.1282	0.727594	1.47857e-05	0.0240412	exon	InterCpgi
chrX	77250139	ATP7A	77.2452	4.44147	100	0	1.47877e-05	0.0240412	intron	InterCpgi
chr8	97162506	GDF6	52.9615	3.75809	79.1228	4.45328	1.47989e-05	0.0240426	intron	InterCpgi
chr2	557820	-	5.09603	1.4354	16.1111	7.04921	1.48272e-05	0.0240716	intergenic	north_shore
chr17	17124911	FLCN	99.3506	0.649351	83.5073	4.86919	1.49619e-05	0.0242063	exon	CpG_Island
chr19	10928687	DNM2	19.9011	4.06124	52.2852	2.08793	1.49303e-05	0.0242063	promoter	InterCpgi
chr19	10928687	MIR199A1	19.9011	4.06124	52.2852	2.08793	1.49303e-05	0.0242063	promoter	InterCpgi
chr19	36297639	PRODH2	97.5252	1.02029	81.285	2.8776	1.49567e-05	0.0242063	exon	InterCpgi
chr4	1985707	WHSC2	98.9098	0.749684	84.429	3.03324	1.4949e-05	0.0242063	exon	north_shore
chr5	176523697	FGFR4	48.5075	5.59728	84.7321	6.05631	1.49624e-05	0.0242063	exon	south_shelf
chr5	1245815	SLC6A18	50.4381	3.75817	28.7295	1.60804	1.49872e-05	0.0242294	intron	south_shore
chr2	242754507	NEU4	53.1746	3.84663	85.1614	3.59977	1.5008e-05	0.0242461	utr5	CpG_Island
chr3	128150934	-	75.8466	5.59916	95.7386	2.9478	1.50315e-05	0.0242505	intergenic	north_shore
chr7	151531939	PRKAG2	84.297	3.87362	100	0	1.50316e-05	0.0242505	intron	InterCpgi
chr1	27258921	NUDC	27.3238	2.51016	54.4896	8.2822	1.5073e-05	0.0243003	intron	InterCpgi
chr14	100031398	CCDC85C	41.7461	6.92318	83.6508	8.4575	1.50909e-05	0.0243008	intron	InterCpgi
chr8	49702305	-	77.0272	3.5459	93.223	2.88679	1.50943e-05	0.0243008	intergenic	InterCpgi
chr10	130009252	-	1.5873	1.5873	29.1259	5.8684	1.52228e-05	0.0243093	intergenic	CpG_Island
chr11	122806102	C11orf63	81.6442	3.72755	100	0	1.51523e-05	0.0243093	intron	InterCpgi
chr1	121152106	-	98.699	0.917777	84.1307	4.1819	1.52307e-05	0.0243093	intergenic	InterCpgi
chr12	133074979	FBRSL1	31.0429	2.24814	59.3462	6.22958	1.51815e-05	0.0243093	intron	south_shore
chr16	88349579	-	28.0015	4.60924	71.8232	8.46181	1.5218e-05	0.0243093	intergenic	InterCpgi
chr17	36666395	ARHGAP23	25.7319	4.95598	3.00523	1.7956	1.51308e-05	0.0243093	exon	CpG_Island
chr19	1779734	-	20.7756	3.83808	43.1159	2.46696	1.51641e-05	0.0243093	intergenic	south_shelf
chr1	9525420	-	94.4705	1.56166	78.1909	1.16728	1.51155e-05	0.0243093	intergenic	InterCpgi
chr19	6007898	RFX2	67.1586	3.28059	45.3233	1.57054	1.51565e-05	0.0243093	intron	CpG_Island
chr20	3729011	HSPA12B	97.551	1.61125	80.0379	4.56912	1.51665e-05	0.0243093	exon	north_shore
chr20	6750833	BMP2	9.12296	2.1327	25.7059	5.29839	1.51933e-05	0.0243093	exon	CpG_Island
chr7	107641847	LAMB1	9.37696	1.91287	21.3526	1.68731	1.52361e-05	0.0243093	intron	CpG_Island
chr7	6647551	C7orf26	34.7332	3.68266	62.5128	7.77283	1.51982e-05	0.0243093	intron	CpG_Island
chr15	76484305	C15orf27	19.4743	3.01928	44.8136	7.24295	1.53129e-05	0.0244124	intron	CpG_Island
chr3	12773685	-	71.8703	3.95139	48.2872	3.72771	1.53323e-05	0.0244124	intergenic	InterCpgi
chr3	50312386	SEMA3B	46.1696	4.7504	79.8494	4.4192	1.53309e-05	0.0244124	intron	south_shore
chr3	50312386	C3orf45	46.1696	4.7504	79.8494	4.4192	1.53309e-05	0.0244124	intron	south_shore
chr11	63998225	TRPT1	0	0	6.73265	2.82818	1.5346e-05	0.0244174	utr5	CpG_Island
chr11	63998225	VEGFB	0	0	6.73265	2.82818	1.5346e-05	0.0244174	utr5	CpG_Island
chr11	63998225	DNAJC4	0	0	6.73265	2.82818	1.5346e-05	0.0244174	utr5	CpG_Island
chr19	2290966	LINGO3	12.6388	3.62438	30.5406	3.77908	1.53839e-05	0.0244512	exon	CpG_Island
chr7	72251022	TYW1B	44.7702	4.24631	17.7381	4.91567	1.53922e-05	0.0244512	intron	InterCpgi
chr9	138684459	KCNT1	78.6625	3.01775	100	0	1.53989e-05	0.0244512	utr3	south_shore
chr9	135862798	GFI1B	71.4807	3.53725	47.1237	5.68842	1.54163e-05	0.0244619	exon	north_shelf
chr1	110169405	AMPD2	87.2487	2.65414	99.1071	0.892857	1.54626e-05	0.0245145	exon	InterCpgi
chr8	144303706	-	81.0203	1.88513	93.4542	2.41128	1.54706e-05	0.0245145	intergenic	InterCpgi
chr4	107242431	TBCK	78.4195	5.21769	97.5521	1.58747	1.54952e-05	0.0245367	utr5	InterCpgi
chr4	107242431	AIMP1	78.4195	5.21769	97.5521	1.58747	1.54952e-05	0.0245367	utr5	InterCpgi
chrX	153831562	-	98.3673	1.07417	79.1105	5.66423	1.55063e-05	0.0245374	intergenic	InterCpgi
chrX	98627298	-	18.8524	3.74352	0.892857	0.892857	1.5518e-05	0.0245392	intergenic	InterCpgi
chr19	49590058	SNRNP70	60.278	4.19783	81.9896	3.32638	1.5556e-05	0.0245826	intron	south_shore
chr16	3197492	-	38.6082	3.93269	75.5704	6.7672	1.55938e-05	0.0246255	intergenic	north_shelf
chr12	109702869	ACACB	71.0436	2.99842	86.5734	3.10314	1.56878e-05	0.0247571	intron	InterCpgi
chr22	25349713	-	5.07019	1.60042	19.193	3.97991	1.57136e-05	0.0247773	intergenic	CpG_Island
chr7	97877803	TECPR1	82.55	2.83158	98.4375	1.5625	1.57221e-05	0.0247773	utr5	north_shelf
chr13	107008389	-	52.0872	3.09218	70.0714	4.73139	1.57436e-05	0.0247944	intergenic	InterCpgi
chr15	22545967	REREP3	59.7993	2.6297	37.9261	8.38134	1.57818e-05	0.0248208	intergenic	CpG_Island
chr2	238707765	RBM44	86.9264	3.7116	100	0	1.57759e-05	0.0248208	utr5	CpG_Island
chr10	79981981	-	22.4904	2.0457	39.1603	2.59522	1.58342e-05	0.0248863	intergenic	InterCpgi
chr14	100417500	-	64.3048	2.0774	88.4474	4.1646	1.58994e-05	0.0248943	intergenic	InterCpgi
chr14	55145352	SAMD4A	100	0	89.9936	3.6198	1.59002e-05	0.0248943	intron	InterCpgi
chr15	66373329	MEGF11	11.258	2.78562	49.7596	13.0265	1.5906e-05	0.0248943	intron	InterCpgi
chr19	31455789	-	100	0	83.6364	5.79731	1.58744e-05	0.0248943	intergenic	InterCpgi
chr2	192109925	MYO1B	0	0	7.61494	3.31551	1.59253e-05	0.0248943	intergenic	CpG_Island
chr5	117618289	-	82.9748	3.92536	100	0	1.58562e-05	0.0248943	exon	InterCpgi
chr6	71666705	B3GAT2	0	0	2.96218	1.49986	1.58958e-05	0.0248943	utr5	CpG_Island
chrX	37003864	-	29.1416	2.31761	16.1141	4.17771	1.59149e-05	0.0248943	intergenic	CpG_Island
chr7	4286925	SDK1	74.9995	4.50439	45.5029	10.932	1.59444e-05	0.0249074	intron	InterCpgi
chr2	44666850	C2orf34	100	0	89.3939	4.07823	1.59811e-05	0.0249478	intron	InterCpgi
chr10	685091	DIP2C	88.5729	2.84786	100	0	1.60608e-05	0.0250553	intron	CpG_Island
chr2	132587064	-	32.5451	2.21525	11.7923	3.78409	1.61185e-05	0.0251284	intergenic	CpG_Island
chr16	77942052	VAT1L	100	0	86.8056	1.57747	1.61396e-05	0.0251444	intron	InterCpgi
chr11	3147910	OSBPL5	35.609	3.77138	56.5282	6.08374	1.61602e-05	0.0251596	intron	InterCpgi
chr13	20876086	-	64.737	2.66514	34.1856	7.77265	1.61852e-05	0.025181	intergenic	CpG_Island
chr8	144328574	ZFP41	7.53629	2.25696	23.3703	3.5627	1.61957e-05	0.025181	intergenic	CpG_Island
chr13	90854134	-	63.8413	3.52384	85.6042	3.44443	1.62517e-05	0.025251	intergenic	InterCpgi
chr1	39739407	MACF1	97.6136	1.13541	82.7924	3.27226	1.62646e-05	0.0252542	intron	InterCpgi
chr1	230333876	GALNT2	91.3416	6.45725	18.8889	13.0998	1.62977e-05	0.0252572	intron	InterCpgi
chr20	36023840	SRC	52.5511	3.08332	77.1014	3.47026	1.62993e-05	0.0252572	intron	InterCpgi
chrX	113817310	HTR2C	22.7724	3.03224	4.83871	3.08847	1.62838e-05	0.0252572	intergenic	south_shore
chr10	5980523	-	99.5392	0.460829	92.4907	2.68798	1.63508e-05	0.0252768	intergenic	InterCpgi
chr1	116381185	NHLH2	1.79211	0.636357	12.0609	4.20811	1.63356e-05	0.0252768	utr5	CpG_Island
chr1	41848165	-	16.6512	3.78426	45.2941	3.99285	1.63724e-05	0.0252768	exon	CpG_Island
chr19	15568422	RASAL3	14.6934	4.42441	0	0	1.63884e-05	0.0252768	exon	CpG_Island
chr19	15568428	RASAL3	14.6934	4.42441	0	0	1.63884e-05	0.0252768	exon	CpG_Island
chr19	15568443	RASAL3	14.6934	4.42441	0	0	1.63884e-05	0.0252768	exon	CpG_Island
chr6	108488639	NR2E1	19.3452	3.97233	43.661	5.72999	1.63788e-05	0.0252768	promoter	CpG_Island
chr21	45144326	PDXK	90.2146	2.08457	100	0	1.64451e-05	0.0253293	intron	InterCpgi
chr2	212581183	ERBB4	94.2902	0.747021	82.9349	2.71073	1.64558e-05	0.0253293	intron	InterCpgi
chr4	8262659	-	30.1328	5.21966	61.3426	4.63541	1.64662e-05	0.0253293	intergenic	InterCpgi
chr7	72848805	FZD9	58.4314	3.58523	86.3095	4.52015	1.64583e-05	0.0253293	exon	CpG_Island
chr1	10623708	PEX14	79.4043	8.4423	32.1357	7.92796	1.65223e-05	0.0253987	intron	InterCpgi
chr6	54441841	-	57.9035	3.58113	33.5516	3.53856	1.65356e-05	0.0254023	intergenic	InterCpgi
chr2	149620390	-	81.6796	2.16942	55.6323	4.21448	1.65618e-05	0.0254256	intergenic	InterCpgi
chr22	43148646	-	45.5962	3.91572	66.4572	2.75883	1.65934e-05	0.0254405	intergenic	InterCpgi
chr6	170759143	-	64.7591	4.35321	30.8635	8.85009	1.65883e-05	0.0254405	intergenic	south_shelf
chr7	149463149	ZNF467	19.5362	7.18316	55.4221	2.12301	1.67242e-05	0.0256086	exon	CpG_Island
chr7	2289054	NUDT1	38.7404	4.25207	64.3791	3.18523	1.67252e-05	0.0256086	intron	InterCpgi
chr12	15900846	EPS8	92.4442	0.995948	80.8927	1.54627	1.68078e-05	0.0256959	utr5	InterCpgi
chr22	49793921	-	54.4044	4.23291	20.5434	6.73243	1.67943e-05	0.0256959	intergenic	InterCpgi
chr4	8204390	SH3TC1	83.2604	4.14332	100	0	1.68155e-05	0.0256959	utr5	InterCpgi
chr10	134853583	-	11.8385	1.37696	0	0	1.68978e-05	0.0258046	intergenic	south_shore
chr5	1080246	SLC12A7	31.6712	1.67869	51.9231	4.73524	1.70552e-05	0.0260278	intron	CpG_Island
chr6	149080877	UST	100	0	91.25	2.9756	1.70748e-05	0.0260406	intron	InterCpgi
chr3	46887699	-	0	0	5.91574	2.73298	1.71052e-05	0.0260698	intergenic	CpG_Island
chr17	46687550	HOXB7	0	0	12.8283	5.14953	1.71268e-05	0.0260855	intron	CpG_Island
chr17	50297552	-	35.3717	2.78274	57.6769	4.07045	1.71933e-05	0.0261696	intergenic	InterCpgi
chr11	47059735	C11orf49	88.568	1.63507	100	0	1.72225e-05	0.0261754	intron	InterCpgi
chr18	72961114	TSHZ1	64.6117	1.72884	81.6352	4.43634	1.72158e-05	0.0261754	utr5	InterCpgi
chr8	144966863	-	34.7472	2.50936	51.0346	2.99669	1.7231e-05	0.0261754	intergenic	CpG_Island
chr1	147009887	BCL9	86.4135	2.79098	43.175	15.0204	1.72805e-05	0.0262333	intergenic	InterCpgi
chr16	58668952	-	56.5672	7.69562	84.4533	3.38706	1.73302e-05	0.0262915	intergenic	InterCpgi
chr21	46244649	-	98.7555	0.827362	82.4252	5.88698	1.73478e-05	0.026301	intergenic	InterCpgi
chr12	64651438	-	90.1969	3.07557	63.0842	2.1169	1.73913e-05	0.0263166	intergenic	InterCpgi
chr17	80899718	TBCD	4.05002	1.44753	14.7727	8.72857	1.73976e-05	0.0263166	intron	south_shore
chr18	46722397	DYM	100	0	90.8686	4.3173	1.7424e-05	0.0263166	intron	InterCpgi
chr19	1154258	SBNO2	70.1064	6.47394	100	0	1.74263e-05	0.0263166	exon	CpG_Island
chr19	7678785	KIAA1543	38.8822	2.64258	14.8525	5.21988	1.74069e-05	0.0263166	intron	south_shore
chr2	231829234	-	64.0721	3.90476	31.5685	6.28874	1.74032e-05	0.0263166	intergenic	InterCpgi
chr4	1801294	FGFR3	13.9572	1.82894	0.581395	0.581395	1.74692e-05	0.0263642	intron	CpG_Island
chr11	120095795	OAF	9.88095	2.88921	41.2879	9.30092	1.74817e-05	0.0263658	intron	InterCpgi
chr7	156255265	-	71.0897	4.4379	90.7828	3.46475	1.75316e-05	0.0263896	intergenic	InterCpgi
chr8	99960844	OSR2	15.1785	2.74072	36.1664	4.15913	1.75218e-05	0.0263896	utr5	CpG_Island
chr9	127106787	NEK6	74.5103	3.74872	95.4307	1.86406	1.75203e-05	0.0263896	intron	InterCpgi
chr11	94277909	FUT4	0	0	4.92063	2.88784	1.75569e-05	0.0264105	exon	CpG_Island
chrX	44551670	-	73.9758	2.81535	88.6088	6.15999	1.75796e-05	0.0264274	intergenic	InterCpgi
chr19	1113820	SBNO2	22.4478	4.53488	0	0	1.75956e-05	0.0264344	intron	south_shore
chr1	16840061	-	60.2492	2.47827	74.1608	2.14103	1.76079e-05	0.0264356	intergenic	north_shore
chr17	43798045	-	33.8827	3.88664	58.0538	1.6666	1.76399e-05	0.0264494	utr5	InterCpgi
chr6	26613975	-	11.133	1.17882	29.7393	5.10969	1.76375e-05	0.0264494	intergenic	north_shore
chr10	134219102	PWWP2B	83.2653	4.93361	100	0	1.76662e-05	0.0264674	exon	CpG_Island
chr14	69052454	RAD51L1	51.7841	3.4592	71.208	5.82145	1.76748e-05	0.0264674	intron	InterCpgi
chr16	12250927	SNX29	90.4915	2.19163	98.4548	0.562929	1.77083e-05	0.0265004	intron	InterCpgi
chr11	63828362	MACROD1	8.22541	0.742592	28.2569	7.39941	1.77322e-05	0.026502	intron	InterCpgi
chr4	186347914	UFSP2	9.53535	1.63059	28.0949	4.39828	1.77241e-05	0.026502	promoter	south_shore
chr4	186347914	C4orf47	9.53535	1.63059	28.0949	4.39828	1.77241e-05	0.026502	promoter	south_shore
chr10	77156421	NCRNA00245	12.6822	1.71376	25.1763	4.75535	1.77787e-05	0.0265048	intergenic	CpG_Island
chr1	201123103	TMEM9	2.87666	0.754449	8.68805	2.93446	1.77934e-05	0.0265048	utr5	north_shore
chr1	30809681	-	35.1265	4.29073	13.1277	0.870007	1.78089e-05	0.0265048	intergenic	InterCpgi
chr18	77194313	NFATC1	62.5296	3.58654	35.4895	2.97835	1.77599e-05	0.0265048	utr5	south_shore
chr20	23337104	-	55.9887	3.07309	35.9102	3.18876	1.77674e-05	0.0265048	intergenic	CpG_Island
chr2	38301608	CYP1B1	7.1243	2.35261	0	0	1.78142e-05	0.0265048	exon	CpG_Island
chrX	98627132	-	83.8492	3.04093	54.123	9.8059	1.77899e-05	0.0265048	intergenic	InterCpgi
chr3	196614788	SENP5	100	0	88.3822	4.04393	1.78328e-05	0.0265153	intron	InterCpgi
chr6	29894322	HCG4P6	1.33917	0.65452	10.5095	3.77981	1.7907e-05	0.0265919	exon	CpG_Island
chrX	7895095	PNPLA4	33.5139	2.86996	54.3408	7.03706	1.79072e-05	0.0265919	utr5	CpG_Island
chr15	57416049	TCF12	100	0	92.4317	2.96047	1.8001e-05	0.0266968	intron	InterCpgi
chrX	153775280	IKBKG	10.9225	2.68696	29.6447	4.89672	1.79955e-05	0.0266968	promoter	CpG_Island
chrX	153775280	G6PD	10.9225	2.68696	29.6447	4.89672	1.79955e-05	0.0266968	promoter	CpG_Island
chr9	41936494	-	0	0	2.21501	0.773417	1.80147e-05	0.0267001	intergenic	CpG_Island
chr17	1499506	SLC43A2	71.4184	2.95116	90.4891	3.25555	1.80601e-05	0.0267331	intron	InterCpgi
chr2	10666668	-	54.7221	4.25659	27.3885	5.76756	1.80516e-05	0.0267331	intergenic	CpG_Island
chr19	3606339	TBXA2R	12.0751	1.45005	28.588	4.2949	1.80919e-05	0.0267461	utr5	north_shore
chr19	42526297	GRIK5	43.3302	5.15561	13.9583	4.8962	1.80808e-05	0.0267461	intron	InterCpgi
chr17	79514871	C17orf70	36.6622	4.00736	57.0579	7.565	1.81452e-05	0.0267906	intron	north_shelf
chr22	47014123	-	87.8648	3.93592	59.0476	6.57031	1.81452e-05	0.0267906	intergenic	north_shore
chr12	95042127	TMCC3	64.4558	5.44299	35.3947	6.36449	1.81705e-05	0.0268108	intron	north_shore
chr17	1131967	-	0.47619	0.47619	12	7.11805	1.82227e-05	0.0268195	intergenic	CpG_Island
chr17	79374727	BAHCC1	42.0436	2.80599	63.2985	5.07529	1.82248e-05	0.0268195	promoter	CpG_Island
chr3	33159040	CRTAP	71.3045	2.77341	92.8416	3.13602	1.82132e-05	0.0268195	intron	south_shelf
chr4	8790040	-	41.8079	3.53517	10.9661	6.81813	1.82343e-05	0.0268195	intergenic	InterCpgi
chr6	58318935	-	98.7431	0.596065	85.0694	6.59722	1.82331e-05	0.0268195	intergenic	InterCpgi
chr3	52112588	POC1A	100	0	91.7978	3.15793	1.82467e-05	0.0268208	intron	InterCpgi
chr19	11689711	ACP5	26.5727	2.60883	55.0189	6.1921	1.82824e-05	0.0268391	promoter	CpG_Island
chr3	98624719	DCBLD2	98.3715	0.848245	79.01	9.84188	1.82767e-05	0.0268391	intergenic	south_shelf
chr4	1041701	-	29.6006	5.57679	6.52412	3.56584	1.83433e-05	0.0269114	intergenic	north_shore
chr17	79066808	BAIAP2	30.985	4.33789	9.0873	2.15056	1.83587e-05	0.026917	intron	InterCpgi
chr17	31248836	-	59.9014	7.00164	79.8172	4.77899	1.8465e-05	0.0270455	intergenic	InterCpgi
chr20	61887435	FLJ16779	38.8833	6.68533	76.1966	2.38028	1.84697e-05	0.0270455	promoter	south_shore
chr20	61887435	NKAIN4	38.8833	6.68533	76.1966	2.38028	1.84697e-05	0.0270455	promoter	south_shore
chr16	4945605	PPL	100	0	88.0141	4.8696	1.85336e-05	0.0271219	exon	InterCpgi
chr1	20948625	-	90.5346	2.90123	65.9404	4.02468	1.85889e-05	0.0271857	intergenic	InterCpgi
chr6	292674	DUSP22	1.64474	1.06712	10.6618	6.33591	1.86442e-05	0.0272492	intron	CpG_Island
chr9	117229016	DFNB31	80.3129	3.54023	59.5209	2.47038	1.86743e-05	0.027276	utr5	InterCpgi
chr12	133220219	POLE	5.27245	1.85583	17.857	6.40702	1.87034e-05	0.0273013	intron	InterCpgi
chr2	61200279	PUS10	99.2481	0.75188	81.2439	4.95933	1.87171e-05	0.0273027	intron	InterCpgi
chr9	37018774	PAX5	85.0462	1.78963	95	5	1.87279e-05	0.0273027	utr5	InterCpgi
chr9	140472741	WDR85	14.3597	2.8841	1.79487	1.04154	1.88637e-05	0.0274834	intron	north_shore
chr5	138923159	-	2.34033	0.917533	20.2273	6.69573	1.88885e-05	0.0275021	intergenic	InterCpgi
chr11	400656	PKP3	16.152	8.76271	68.1343	7.4078	1.89221e-05	0.0275338	exon	CpG_Island
chr12	7921319	NANOGNB	26.0295	5.14061	4.18002	1.73349	1.8956e-05	0.0275524	intron	InterCpgi
chr3	38094916	DLEC1	100	0	75.625	5.80723	1.89587e-05	0.0275524	intron	InterCpgi
chr10	43361760	-	0	0	17.3925	8.33806	1.90062e-05	0.0275867	intergenic	CpG_Island
chr3	49395165	GPX1	0.510204	0.510204	5.95129	0.818431	1.90007e-05	0.0275867	utr3	CpG_Island
chr7	27089046	-	94.0979	1.33958	82.3937	6.02617	1.90199e-05	0.0275894	intergenic	InterCpgi
chr2	64291259	-	15.0482	1.44563	28.9676	1.83188	1.90595e-05	0.0276295	intergenic	InterCpgi
chr1	95300165	SLC44A3	61.6513	4.80044	31.1699	8.6868	1.90906e-05	0.0276572	intron	InterCpgi
chr1	3688353	LOC388588	58.3969	5.73426	91.2202	3.18118	1.91544e-05	0.0276656	intergenic	north_shore
chr14	103563882	C14orf73	14.8907	1.60074	34.791	5.76764	1.9151e-05	0.0276656	intergenic	InterCpgi
chr14	94024818	KIAA1409	68.3708	6.35412	97.2222	2.77778	1.91194e-05	0.0276656	intron	InterCpgi
chr18	43196938	SLC14A2	56.5477	3.31142	83.0632	4.12871	1.91227e-05	0.0276656	utr5	InterCpgi
chrX	103411144	FAM199X	51.2606	7.16919	9.12698	5.51287	1.91561e-05	0.0276656	promoter	CpG_Island
chr16	70344998	DDX19B	3.48631	1.59558	13.4804	5.11758	1.91831e-05	0.0276873	utr5	InterCpgi
chr1	225638227	-	4.41094	1.0008	18.0452	4.60286	1.92062e-05	0.0276891	intergenic	InterCpgi
chr9	139498677	-	49.8092	4.621	82.339	4.90805	1.92083e-05	0.0276891	intergenic	InterCpgi
chr11	64572223	MEN1	98.6102	0.924204	83.3333	4.8882	1.92381e-05	0.0277149	promoter	south_shore
chr11	64572223	MAP4K2	98.6102	0.924204	83.3333	4.8882	1.92381e-05	0.0277149	promoter	south_shore
chr20	60775990	GTPBP5	43.04	4.77895	82.5758	7.55907	1.93154e-05	0.0278089	exon	CpG_Island
chr1	10699371	CASZ1	57.6281	6.538	93.8025	4.17137	1.93691e-05	0.0278688	exon	south_shore
chr13	32980200	N4BP2L1	55.3464	3.57861	26.9776	5.71402	1.9475e-05	0.027996	intron	InterCpgi
chr9	124522454	DAB2IP	23.962	2.59621	4.13127	2.60219	1.94816e-05	0.027996	exon	CpG_Island
chr10	105421107	SH3PXD2A	19.1539	1.8077	36.9338	3.59493	1.9582e-05	0.0280944	intron	south_shore
chr12	108239570	-	22.5603	4.58501	3.83523	2.28895	1.95798e-05	0.0280944	intergenic	south_shore
chr2	114033747	LOC440839	49.8996	4.53049	74.4815	3.90046	1.95865e-05	0.0280944	intron	south_shore
chr2	114033747	PAX8	49.8996	4.53049	74.4815	3.90046	1.95865e-05	0.0280944	intron	south_shore
chr11	46338352	CREB3L1	81.4842	1.91559	94.7222	3.05556	1.964e-05	0.0281016	intron	InterCpgi
chr2	242833115	-	74.9088	5.54145	97.8261	2.17391	1.96292e-05	0.0281016	intergenic	CpG_Island
chr3	6274759	-	86.0705	1.54317	98.212	1.03362	1.96285e-05	0.0281016	intergenic	InterCpgi
chrX	70585717	TAF1	23.1716	3.66031	50.9059	3.3346	1.96321e-05	0.0281016	promoter	CpG_Island
chrX	70585717	BCYRN1	23.1716	3.66031	50.9059	3.3346	1.96321e-05	0.0281016	promoter	CpG_Island
chr14	95233752	-	15.9823	4.09361	41.5977	4.29895	1.96735e-05	0.0281193	intergenic	north_shore
chr9	88715139	GOLM1	3.105	0.95324	11.7405	1.30567	1.96768e-05	0.0281193	promoter	south_shore
chr10	43429416	-	10.6696	0.848904	0.862069	0.862069	1.97114e-05	0.0281239	intergenic	CpG_Island
chr1	16077193	-	88.1963	0.812915	78.2789	2.99984	1.97259e-05	0.0281239	intergenic	south_shelf
chr12	125039272	NCOR2	12.0624	3.04875	0	0	1.97285e-05	0.0281239	utr5	CpG_Island
chr17	59529365	TBX4	1.42857	1.42857	20.1207	6.2058	1.97102e-05	0.0281239	intergenic	CpG_Island
chr11	61486429	DAGLA	34.6218	3.50772	50.4971	6.27798	1.98584e-05	0.0281528	utr5	north_shore
chr1	32501930	KHDRBS1	80.0621	2.57485	63.9967	2.76226	1.98239e-05	0.0281528	intron	InterCpgi
chr14	50265517	SDCCAG1	90.8931	2.15981	100	0	1.97756e-05	0.0281528	intron	InterCpgi
chr17	21496843	-	80.9977	4.80014	100	0	1.98693e-05	0.0281528	intergenic	south_shore
chr3	121712212	ILDR1	91.9491	2.06495	68.7859	6.49667	1.97948e-05	0.0281528	exon	CpG_Island
chr5	77687537	SCAMP1	96.9631	0.677984	87.2917	4.89916	1.98267e-05	0.0281528	intron	InterCpgi
chr6	169585526	-	98.7013	1.2987	88.8558	4.57653	1.98704e-05	0.0281528	intergenic	InterCpgi
chr7	64344073	-	43.3672	3.64391	64.457	3.11916	1.97906e-05	0.0281528	intergenic	InterCpgi
chrX	153200373	NAA10	23.6884	3.71061	1.19048	1.19048	1.98399e-05	0.0281528	utr5	CpG_Island
chrX	84189377	UBE2DNL	89.3762	2.59924	100	0	1.98515e-05	0.0281528	exon	CpG_Island
chr11	64940197	SPDYC	43.3206	5.68857	75.7246	4.43255	1.99196e-05	0.0282006	exon	InterCpgi
chr15	41218385	DLL4	2.78912	2.34768	22.2375	9.07843	1.99407e-05	0.0282006	intergenic	CpG_Island
chr19	55813845	BRSK1	43.3853	2.53784	67.0185	3.33628	1.99361e-05	0.0282006	intron	north_shore
chr11	63894871	MACROD1	49.5998	5.95246	11.1111	6.415	2.00262e-05	0.0282525	intron	InterCpgi
chr1	73190247	-	65.5538	1.59534	41.7208	6.02256	1.99955e-05	0.0282525	intergenic	InterCpgi
chr19	5686442	HSD11B1L	11.2409	1.71272	30.0595	2.80773	2.00198e-05	0.0282525	utr5	north_shore
chr19	5686442	RPL36	11.2409	1.71272	30.0595	2.80773	2.00198e-05	0.0282525	utr5	north_shore
chr4	8174095	-	90.2603	2.9907	61.4912	14.0134	2.00253e-05	0.0282525	intergenic	InterCpgi
chr10	97745663	-	78.8858	5.26426	98.6842	1.31579	2.00737e-05	0.0282957	intergenic	InterCpgi
chr19	48345360	CRX	74.6411	1.6827	87.6582	2.19273	2.00813e-05	0.0282957	utr3	InterCpgi
chr6	3926384	-	51.7661	2.10547	77.0828	1.66657	2.02143e-05	0.0284658	intergenic	InterCpgi
chr20	61874164	NKAIN4	68.2125	4.29972	93.0513	3.50594	2.02271e-05	0.0284666	intron	south_shelf
chr19	2291469	LINGO3	5.42221	3.47121	30.0275	3.18282	2.02825e-05	0.0285271	exon	CpG_Island
chr19	34932216	UBA2	94.447	1.37815	81.3209	7.1534	2.03249e-05	0.0285695	intron	InterCpgi
chr16	1310513	-	81.9048	4.6368	47.5134	9.91904	2.03547e-05	0.0285939	intergenic	CpG_Island
chr18	20139009	-	0	0	16.3753	7.38072	2.04034e-05	0.028645	intergenic	north_shore
chr9	130997140	DNM1	71.4876	4.60098	94.1399	3.47258	2.04342e-05	0.0286709	intron	south_shore
chr1	32084057	HCRTR1	3.07362	1.62192	27.1825	9.05119	2.04758e-05	0.0286771	utr5	CpG_Island
chr20	29535069	-	26.9316	4.47492	5	5	2.04658e-05	0.0286771	intergenic	CpG_Island
chr2	20405116	SDC1	91.5318	1.20279	100	0	2.04521e-05	0.0286771	exon	InterCpgi
chr1	18978359	PAX7	32.0236	4.19526	58.2482	3.99127	2.04954e-05	0.0286872	intron	InterCpgi
chr9	100881349	TRIM14	0	0	3.90646	1.89798	2.05081e-05	0.0286875	exon	CpG_Island
chr5	92923930	NR2F1	35.1795	4.31394	74.9853	9.66347	2.05976e-05	0.0287954	exon	CpG_Island
chr17	29718110	RAB11FIP4	20.9585	4.42299	51.7806	5.5565	2.06106e-05	0.0287962	promoter	north_shore
chr5	40722805	TTC33	100	0	67.6007	10.7539	2.06261e-05	0.0288005	intron	InterCpgi
chr7	1123156	C7orf50	73.1943	3.71838	89.3461	2.04408	2.06849e-05	0.0288652	intron	south_shelf
chr7	1123156	GPER	73.1943	3.71838	89.3461	2.04408	2.06849e-05	0.0288652	intron	south_shelf
chr1	4688442	-	69.7326	3.99146	84.1086	6.61259	2.0713e-05	0.0288695	intergenic	InterCpgi
chr15	90818316	-	100	0	83.6607	5.70216	2.07055e-05	0.0288695	intergenic	CpG_Island
chr15	31685110	-	20.4524	5.31566	55.7788	8.04185	2.07411e-05	0.0288913	intron	CpG_Island
chr8	10589604	SOX7	54.1391	2.76314	77.7231	5.08695	2.07627e-05	0.028904	promoter	CpG_Island
chr2	130903169	CCDC74B	76.5584	3.26649	89.3319	4.14493	2.07991e-05	0.0289199	promoter	south_shore
chr22	50717069	PLXNB2	98.254	1.13356	86.8346	2.35008	2.07991e-05	0.0289199	exon	south_shore
chr19	1132918	SBNO2	44.9042	5.04023	74.3817	6.13663	2.0967e-05	0.0291359	promoter	InterCpgi
chr21	46876525	COL18A1	63.0408	3.20654	41.0714	5.35714	2.09885e-05	0.0291483	exon	CpG_Island
chr3	122645277	SEMA5B	25.5395	4.78763	50.431	6.81778	2.10247e-05	0.029181	exon	south_shelf
chr16	54471528	-	20.358	2.87913	5.57882	2.10716	2.10603e-05	0.0292104	intergenic	InterCpgi
chr4	8249450	-	46.1951	3.53938	70.4302	5.77617	2.10711e-05	0.0292104	intergenic	InterCpgi
chr15	70505543	-	72.1655	5.36904	94.8333	2.30114	2.10901e-05	0.0292192	intergenic	InterCpgi
chr10	77156299	NCRNA00245	18.9331	1.41247	37.2768	12.7232	2.11148e-05	0.029236	intergenic	CpG_Island
chr3	50206058	SEMA3F	32.0406	3.12929	12.0362	2.77135	2.11439e-05	0.0292588	intron	InterCpgi
chr19	50961914	MYBPC2	6.82089	1.22478	22.6267	7.35478	2.11878e-05	0.0292845	exon	CpG_Island
chr5	156968222	ADAM19	27.2906	6.8972	60.2836	5.23176	2.11821e-05	0.0292845	intron	InterCpgi
chr19	2489065	-	2.19084	0.914971	12.4098	4.99349	2.12309e-05	0.0293266	intergenic	CpG_Island
chr4	3609518	-	67.585	4.49451	36.0928	4.97774	2.12786e-05	0.0293749	intergenic	InterCpgi
chr7	1708997	-	31.4881	10.3461	66.6132	4.07701	2.13597e-05	0.0294546	intergenic	CpG_Island
chr8	145665392	TONSL	99.2857	0.714286	80.3373	3.31064	2.13618e-05	0.0294546	intron	south_shelf
chr19	38702746	DPF1	37.9571	3.31398	68.0471	5.45093	2.13952e-05	0.0294772	exon	south_shelf
chrX	152830447	ATP2B3	85.1228	0.849196	69.7669	4.0343	2.14036e-05	0.0294772	exon	InterCpgi
chr17	78451568	NPTX1	0	0	11.25	4.48118	2.14545e-05	0.0295122	promoter	CpG_Island
chr6	16327271	ATXN1	38.148	3.33315	15.9267	4.62824	2.14436e-05	0.0295122	exon	CpG_Island
chr7	7015142	-	49.8964	3.47027	22.9048	4.62493	2.15074e-05	0.0295674	intergenic	InterCpgi
chr6	36355687	ETV7	0	0	29.5781	12.1427	2.15315e-05	0.0295829	promoter	CpG_Island
chr1	2232532	SKI	38.4927	5.82017	76.7885	8.49119	2.15909e-05	0.0296293	intron	CpG_Island
chr4	106167180	TET2	100	0	80.016	3.90871	2.15826e-05	0.0296293	intron	InterCpgi
chr17	80291594	SECTM1	5.77098	2.28561	22.8316	4.88206	2.16267e-05	0.0296609	utr5	CpG_Island
chr7	48129961	UPP1	37.3734	3.88027	58.269	4.13432	2.18379e-05	0.0299151	utr5	CpG_Island
chr8	25900056	EBF2	10.132	2.08119	24.4695	1.86724	2.18363e-05	0.0299151	intron	south_shore
chr1	201113163	TMEM9	41.3283	3.89644	16.0793	5.49293	2.18567e-05	0.0299206	intron	InterCpgi
chr7	47576577	TNS3	37.9791	3.09854	59.1625	4.13443	2.18678e-05	0.0299206	utr5	CpG_Island
chr14	24551142	NRL	60.9039	3.17214	87.5183	5.39331	2.19018e-05	0.0299495	intron	CpG_Island
chr22	24199091	SLC2A11	18.0076	3.15104	5.56818	4.84034	2.19429e-05	0.0299858	promoter	CpG_Island
chr2	8738660	-	43.8161	5.22194	75.6207	2.63312	2.19543e-05	0.0299858	intergenic	InterCpgi
chr8	142337203	-	44.1952	2.87167	69.66	6.70751	2.19816e-05	0.0300055	intergenic	InterCpgi
chr11	119191899	MCAM	5.31286	1.37713	21.5105	3.48225	2.19971e-05	0.0300089	intergenic	CpG_Island
chr11	75381029	MAP6	100	0	88.8833	0.732421	2.20548e-05	0.0300522	promoter	south_shore
chr13	71347823	-	32.7441	3.30853	53.1894	1.82426	2.20448e-05	0.0300522	intergenic	InterCpgi
chr13	43569620	EPSTI1	100	0	90.9722	3.02701	2.20943e-05	0.0300883	intergenic	south_shelf
chr2	42329927	-	31.7008	4.35383	66.5235	7.63361	2.21094e-05	0.0300912	intergenic	south_shore
chr17	78897633	RPTOR	41.7357	3.52792	64.5089	1.47502	2.21427e-05	0.0301011	intron	south_shore
chr17	79395263	BAHCC1	17.5414	2.87715	2.5	2.5	2.21351e-05	0.0301011	intron	south_shore
chr10	37970341	-	92.2593	2.20519	65.7292	9.77225	2.22525e-05	0.0301442	intergenic	CpG_Island
chr1	40273822	-	96.6089	2.58636	62.2059	13.1717	2.22146e-05	0.0301442	intergenic	InterCpgi
chr18	49234614	-	90.401	1.75875	100	0	2.2239e-05	0.0301442	intergenic	InterCpgi
chr20	34190099	FER1L4	2.88384	1.0678	15.4326	2.68954	2.22164e-05	0.0301442	exon	CpG_Island
chr3	72909753	-	86.605	2.75398	65.5692	5.39669	2.22433e-05	0.0301442	intergenic	InterCpgi
chr8	56762824	-	96.8945	1.60582	83.8215	3.27828	2.22358e-05	0.0301442	intergenic	InterCpgi
chr20	61022970	-	21.4713	3.31713	44.5595	11.8911	2.22659e-05	0.0301447	intergenic	InterCpgi
chr22	50633600	TRABD	60.3191	5.71675	89.0966	5.2974	2.23675e-05	0.0302312	intron	south_shore
chr6	121732959	-	94.8251	2.05477	72.2713	10.7577	2.2369e-05	0.0302312	intergenic	InterCpgi
chr8	145640737	SLC39A4	74.7735	3.17277	98.6842	1.31579	2.23645e-05	0.0302312	promoter	south_shore
chr5	119517817	-	93.4321	3.6577	79.193	2.97355	2.24057e-05	0.0302632	intergenic	InterCpgi
chr6	83797743	DOPEY1	99.5238	0.47619	88.4964	5.71801	2.24404e-05	0.0302923	utr5	InterCpgi
chr7	20344873	-	97.5562	1.62491	80.5127	5.48214	2.2458e-05	0.0302985	intergenic	InterCpgi
chr6	155287395	-	87.778	1.63164	73.7634	3.841	2.24887e-05	0.0303222	intergenic	InterCpgi
chr21	45563272	C21orf33	61.2509	0.862672	86.5079	5.88587	2.25096e-05	0.0303328	intron	south_shelf
chr1	27258961	NUDC	54.5097	3.42197	77.3475	5.9283	2.25647e-05	0.0303652	intron	InterCpgi
chr2	132183007	-	0	0	4.59559	2.97734	2.2573e-05	0.0303652	intergenic	CpG_Island
chr6	1039733	LOC285768	83.3485	2.18327	95.9491	2.94855	2.25594e-05	0.0303652	intergenic	InterCpgi
chr1	41973691	-	83.551	3.43797	100	0	2.25911e-05	0.0303718	utr3	InterCpgi
chr2	100748046	AFF3	100	0	91.8505	2.86421	2.26737e-05	0.0304488	utr5	InterCpgi
chr22	47552704	TBC1D22A	28.5713	4.84735	6.65391	3.04116	2.26746e-05	0.0304488	intron	InterCpgi
chr1	29047752	-	96.9179	1.23928	80.2925	2.15144	2.26934e-05	0.0304532	intergenic	InterCpgi
chr2	241823337	-	38.1311	2.92409	20.2416	12.6796	2.27043e-05	0.0304532	intergenic	InterCpgi
chr10	29060387	-	87.9718	3.72142	100	0	2.27416e-05	0.0304552	intergenic	InterCpgi
chr1	151226904	PSMD4	0	0	13.5714	4.72005	2.27398e-05	0.0304552	promoter	InterCpgi
chr7	87260910	ABCB1	84.0082	3.60012	100	0	2.27452e-05	0.0304552	utr5	south_shelf
chr7	87260910	RUNDC3B	84.0082	3.60012	100	0	2.27452e-05	0.0304552	utr5	south_shelf
chr1	17307691	MFAP2	69.325	6.47302	96.0769	2.26586	2.28019e-05	0.0304834	promoter	south_shore
chr12	111484888	CUX2	57.0662	7.32454	94.494	3.23639	2.28382e-05	0.0304834	intron	InterCpgi
chr12	7352580	PEX5	5.21542	2.49089	28.3333	7.39119	2.28218e-05	0.0304834	intron	InterCpgi
chr16	32857814	-	55.6645	2.82973	79.542	4.51013	2.28453e-05	0.0304834	intergenic	CpG_Island
chr1	943299	-	43.3264	0.999185	54.5093	3.7843	2.27877e-05	0.0304834	intergenic	InterCpgi
chr9	124132888	STOM	51.2358	2.66875	66.4958	5.07627	2.28278e-05	0.0304834	promoter	CpG_Island
chr1	143279843	-	17.5862	2.44477	31.4554	2.76956	2.29945e-05	0.0306648	intergenic	InterCpgi
chr1	231176932	FAM89A	6.55246	1.7727	31.7034	9.76034	2.30093e-05	0.0306669	promoter	CpG_Island
chr17	77083037	ENGASE	24.1797	3.04496	49.6483	2.14893	2.3055e-05	0.0307102	utr3	InterCpgi
chr3	122641232	SEMA5B	23.074	3.48181	45.7001	4.61407	2.31013e-05	0.0307541	exon	CpG_Island
chr10	131766733	EBF3	65.4858	3.31707	86.4881	4.62211	2.31288e-05	0.0307636	intergenic	CpG_Island
chr4	162198404	-	98.7319	0.502647	90.9269	3.192	2.3135e-05	0.0307636	intergenic	InterCpgi
chr22	44598792	PARVG	28.5599	3.81453	56.4075	5.45182	2.32214e-05	0.0308608	intron	InterCpgi
chr12	111842918	SH2B3	14.445	1.66641	36.4434	8.14452	2.32434e-05	0.0308722	intergenic	north_shore
chr5	176930735	DOK3	93.339	3.13654	76.5909	3.06888	2.32618e-05	0.030879	intron	north_shore
chr19	14097434	RFX1	34.3958	3.82712	68.3333	4.19435	2.33052e-05	0.0309188	intron	InterCpgi
chr9	137002091	WDR5	0	0	14.4264	6.38224	2.33234e-05	0.0309254	utr5	south_shore
chr10	135383493	SYCE1	45.3111	3.71107	29.0924	2.53073	2.33871e-05	0.0309864	promoter	CpG_Island
chr10	135383493	SPRNP1	45.3111	3.71107	29.0924	2.53073	2.33871e-05	0.0309864	promoter	CpG_Island
chr10	94456052	-	26.9946	3.76094	5	3.37558	2.34291e-05	0.0309864	intergenic	south_shore
chr1	61519393	-	0.324675	0.324675	4.62998	2.15306	2.34194e-05	0.0309864	intergenic	CpG_Island
chr16	58330531	PRSS54	57.339	3.1775	81.2862	5.23866	2.34364e-05	0.0309864	promoter	InterCpgi
chr9	99342804	CDC14B	100	0	88.8889	4.1574	2.34229e-05	0.0309864	intron	InterCpgi
chr10	73343013	CDH23	83.1094	3.29384	100	0	2.3469e-05	0.0310031	intron	InterCpgi
chr7	89963721	-	87.1104	3.27781	98.0769	1.92308	2.34758e-05	0.0310031	intergenic	InterCpgi
chr17	48384089	-	81.3892	2.51517	96.1721	2.37055	2.35207e-05	0.0310334	intergenic	InterCpgi
chr17	8905674	-	39.1637	7.51111	61.1377	2.78133	2.35335e-05	0.0310334	intergenic	north_shore
chrX	47078524	CDK16	0	0	6.66667	4.08248	2.35389e-05	0.0310334	utr5	CpG_Island
chr15	78091167	-	70.8639	1.9707	85.9127	1.72259	2.36116e-05	0.0311114	utr5	InterCpgi
chr20	44561336	PCIF1	97.8912	1.47636	81.3731	5.07663	2.36515e-05	0.0311462	intergenic	north_shore
chr1	2931557	-	62.2787	2.17225	83.6476	2.58667	2.37041e-05	0.0311503	intergenic	south_shelf
chr3	49839899	CDHR4	15.9783	2.79189	39.3884	7.94871	2.367e-05	0.0311503	promoter	north_shore
chr3	49839899	C3orf54	15.9783	2.79189	39.3884	7.94871	2.367e-05	0.0311503	promoter	north_shore
chr6	169332497	-	98.4605	0.743733	85.3012	6.18138	2.37084e-05	0.0311503	intergenic	south_shore
chr6	50319949	-	100	0	88.5192	0.962117	2.36858e-05	0.0311503	intergenic	InterCpgi
chr2	136847745	-	28.8648	4.085	5.625	3.28744	2.37268e-05	0.0311568	intergenic	InterCpgi
chr12	123349279	-	97.6464	1.13421	86.722	4.76967	2.384e-05	0.0312205	intergenic	north_shelf
chr1	3400412	-	64.7982	3.87687	34.8885	5.19764	2.38127e-05	0.0312205	intergenic	InterCpgi
chr17	7750678	KDM6B	12.4957	1.4205	1.44958	0.837091	2.38427e-05	0.0312205	exon	south_shelf
chr3	38671883	SCN5A	50.2265	5.48386	20.4639	3.56448	2.38066e-05	0.0312205	exon	InterCpgi
chrX	31284636	DMD	14.0775	3.08381	43.8262	4.45475	2.38395e-05	0.0312205	intron	CpG_Island
chr10	30468639	-	73.9702	4.97461	40.9311	4.86802	2.3894e-05	0.0312523	intergenic	InterCpgi
chr1	152161665	-	14.9953	2.27113	40.1786	7.90233	2.3889e-05	0.0312523	intergenic	CpG_Island
chr7	155252945	EN2	21.4451	5.10627	0	0	2.39106e-05	0.0312563	intron	south_shore
chr8	74361299	STAU2	99.1071	0.892857	86.0469	5.38103	2.3927e-05	0.0312602	intron	CpG_Island
chr8	22437374	PDLIM2	44.504	2.67777	71.8358	3.88204	2.39448e-05	0.0312658	promoter	south_shore
chr18	4455444	-	0	0	4.07738	1.4967	2.39946e-05	0.0313131	promoter	CpG_Island
chrX	73234752	NCRNA00183	45.062	3.71226	73.8258	3.55193	2.40879e-05	0.0314171	intergenic	InterCpgi
chr15	84544483	ADAMTSL3	100	0	82.6677	5.52862	2.41185e-05	0.0314393	intron	InterCpgi
chr17	73518020	LLGL2	85.885	4.30615	100	0	2.41853e-05	0.031491	exon	CpG_Island
chr17	73518020	TSEN54	85.885	4.30615	100	0	2.41853e-05	0.031491	exon	CpG_Island
chr6	20319209	-	42.2872	4.06525	8.57843	4.9568	2.41792e-05	0.031491	intergenic	InterCpgi
chr15	83953750	BNC1	0.649351	0.649351	10.9153	1.35075	2.42436e-05	0.0315358	promoter	CpG_Island
chr19	40903425	PRX	12.5289	1.65295	1.77083	1.18311	2.42469e-05	0.0315358	utr3	north_shore
chr16	86531306	LOC400550	0.840336	0.840336	13.1475	1.43462	2.43316e-05	0.0316058	intergenic	CpG_Island
chr19	11689749	ACP5	18.4692	3.1006	47.9032	7.30623	2.43371e-05	0.0316058	promoter	CpG_Island
chr7	6159688	USP42	61.5938	6.14828	33.1158	4.43196	2.43417e-05	0.0316058	intron	InterCpgi
chr11	26288130	-	97.397	1.56802	83.1944	4.19665	2.43768e-05	0.0316335	intergenic	InterCpgi
chr1	46892911	-	15.2317	3.31848	34.3168	3.82809	2.44009e-05	0.0316471	intergenic	InterCpgi
chr7	30954812	AQP1	53.126	4.04151	81.9643	1.34818	2.44194e-05	0.0316533	intron	InterCpgi
chr16	30096021	PPP4C	63.7018	5.50294	92.4451	3.14337	2.44521e-05	0.031678	exon	InterCpgi
chr5	20305672	-	96.9728	1.51185	77.3954	5.57431	2.44871e-05	0.0317056	utr5	CpG_Island
chr1	22291755	-	96.8306	1.66036	80.308	4.81274	2.4548e-05	0.0317489	intergenic	InterCpgi
chr17	79145983	LOC388428	37.3716	5.12426	69.3558	5.4464	2.45357e-05	0.0317489	intergenic	InterCpgi
chr21	45951710	C21orf29	69.821	2.16944	47.6329	4.61991	2.45743e-05	0.0317652	intron	InterCpgi
chr16	84778784	USP10	64.1672	2.90015	85.6828	5.70417	2.46114e-05	0.0317954	exon	InterCpgi
chr16	71465419	-	39.6349	1.40665	55.2372	2.85562	2.4653e-05	0.0318155	intergenic	InterCpgi
chr17	77734475	-	86.4156	2.19519	100	0	2.46544e-05	0.0318155	intergenic	InterCpgi
chr4	183064078	MGC45800	7.0741	1.45588	21.3819	6.28151	2.46791e-05	0.0318296	exon	CpG_Island
chr1	198953276	-	43.6261	6.26624	83.6988	5.78225	2.47281e-05	0.0318668	intergenic	InterCpgi
chr1	53281373	ZYG11B	66.8577	1.47524	54.9308	2.44514	2.4763e-05	0.0318668	intron	InterCpgi
chr19	11927571	ZNF440	85.2159	3.47688	65.8502	1.13675	2.47548e-05	0.0318668	intron	south_shelf
chr9	137216663	RXRA	22.0386	2.46103	44.1434	6.20152	2.4761e-05	0.0318668	promoter	north_shore
chr10	125426091	GPR26	7.11774	1.7081	0	0	2.48161e-05	0.0318853	exon	CpG_Island
chr11	120362039	-	99.1071	0.892857	88.8765	4.27017	2.48501e-05	0.0318853	intergenic	InterCpgi
chr15	25603192	UBE3A	89.9721	2.65172	100	0	2.48511e-05	0.0318853	intron	InterCpgi
chr4	102712119	BANK1	0	0	6.16667	2.16667	2.48738e-05	0.0318853	intron	CpG_Island
chr4	178114721	-	98.4127	1.5873	80.6029	3.81792	2.48646e-05	0.0318853	intergenic	InterCpgi
chr5	17062391	-	96.4052	1.80812	76.281	4.45478	2.48595e-05	0.0318853	intergenic	InterCpgi
chr6	170759189	-	66.0458	3.53367	39.9702	4.59354	2.48709e-05	0.0318853	intergenic	south_shelf
chr2	235053390	-	100	0	88.3036	4.21412	2.4906e-05	0.0318913	intergenic	InterCpgi
chr7	75211572	HIP1	93.5923	2.37902	68.9994	7.50901	2.48941e-05	0.0318913	intron	InterCpgi
chr10	3805433	-	34.1177	2.86298	50.11	5.77509	2.49347e-05	0.0319052	intergenic	InterCpgi
chr2	241317605	-	97.1934	1.40889	86.1984	4.98527	2.49444e-05	0.0319052	intergenic	InterCpgi
chr19	2290999	LINGO3	10.2682	2.03102	24.3411	10.5727	2.50212e-05	0.0319505	exon	CpG_Island
chr20	60951890	-	27.2636	2.90822	10.1768	1.43509	2.50043e-05	0.0319505	intergenic	north_shore
chr3	50645286	CISH	76.5057	3.48878	48.7738	2.33257	2.50086e-05	0.0319505	exon	north_shelf
chr12	2771167	CACNA1C	77.4088	2.90637	47.1784	5.79029	2.50662e-05	0.0319727	intron	InterCpgi
chr17	69567970	-	68.3962	4.4612	43.4127	3.83835	2.50552e-05	0.0319727	intergenic	InterCpgi
chr2	36407217	-	97.5398	1.21725	82.1825	6.36914	2.50969e-05	0.0319843	intergenic	InterCpgi
chr3	193587484	-	78.8247	3.58338	97.1154	2.39935	2.5103e-05	0.0319843	intergenic	CpG_Island
chr19	58868708	ZNF497	42.8058	5.79346	81.6071	6.37794	2.51501e-05	0.0320267	exon	CpG_Island
chr19	58868708	A1BG	42.8058	5.79346	81.6071	6.37794	2.51501e-05	0.0320267	exon	CpG_Island
chr13	26527873	ATP8A2	85.598	2.39983	65.4841	10.0243	2.51708e-05	0.0320355	intron	InterCpgi
chr11	76562338	-	55.7448	3.67386	25.7456	10.2155	2.51889e-05	0.0320409	intergenic	InterCpgi
chr12	106979840	RFX4	0.734742	0.511404	9.77273	4.0888	2.52466e-05	0.0320966	intron	CpG_Island
chr1	156591430	HAPLN2	91.2968	2.03005	72.8571	1.70342	2.5288e-05	0.0321003	utr5	north_shelf
chr3	175733969	-	100	0	75.0704	8.34769	2.52911e-05	0.0321003	intergenic	InterCpgi
chr7	115357167	-	59.5897	4.05261	83.6278	7.24946	2.52724e-05	0.0321003	intergenic	InterCpgi
chr15	68112104	-	6.14556	1.75614	25.9341	4.94718	2.54424e-05	0.0322746	intron	north_shore
chr11	1275972	MUC5B	73.8206	4.57757	95.5662	1.74329	2.54764e-05	0.0322825	promoter	south_shore
chr17	79166943	AZI1	30.2089	4.20411	58.6538	6.86855	2.5473e-05	0.0322825	intron	south_shore
chr11	72710611	FCHSD2	33.5457	6.82847	67.2866	3.43279	2.55085e-05	0.0322878	intron	InterCpgi
chr8	23605629	-	8.45904	2.04502	29.4499	6.54975	2.55072e-05	0.0322878	intergenic	InterCpgi
chr16	2126791	TSC2	98.1123	1.12199	85.1899	2.07527	2.55285e-05	0.0322953	intron	south_shore
chr1	178456071	-	36.7723	2.8373	23.2381	6.26273	2.55804e-05	0.0323434	intergenic	CpG_Island
chr9	137529779	COL5A1	75.4058	5.03757	91.5918	0.829149	2.56285e-05	0.0323865	intergenic	north_shelf
chr12	6607860	NCAPD2	100	0	95.4187	2.80211	2.56961e-05	0.0324188	intron	InterCpgi
chr19	10472779	TYK2	29.7545	3.19591	5.78704	3.59356	2.56956e-05	0.0324188	exon	InterCpgi
chr22	38507171	BAIAP2L2	53.7635	5.78973	77.3232	3.84668	2.56721e-05	0.0324188	promoter	InterCpgi
chr1	16862284	-	33.7014	1.82623	48.2958	4.24631	2.59019e-05	0.0324838	intergenic	CpG_Island
chr12	70698927	CNOT2	96.2451	0.992025	42.2346	20.9168	2.57738e-05	0.0324838	intron	InterCpgi
chr12	89744881	DUSP6	2.43019	0.910906	16.2572	1.16041	2.58578e-05	0.0324838	intron	north_shore
chr17	79640743	CCDC137	48.1624	5.42583	80.9673	4.32456	2.58761e-05	0.0324838	utr3	InterCpgi
chr21	45560150	C21orf33	25.252	3.11703	46.3253	4.76409	2.58799e-05	0.0324838	exon	north_shore
chr21	46913237	COL18A1	27.643	3.16213	14.0371	3.9303	2.58198e-05	0.0324838	intron	south_shore
chr2	31215603	GALNT14	86.4259	1.70941	58.5028	13.5507	2.58426e-05	0.0324838	intron	InterCpgi
chr2	38204884	FAM82A1	99.0476	0.952381	86.9627	5.16565	2.58812e-05	0.0324838	intron	InterCpgi
chr5	135266363	FBXL21	9.4733	1.88083	31.1237	8.457	2.5893e-05	0.0324838	utr5	CpG_Island
chr6	160140915	-	38.8449	5.1188	6.93582	4.52773	2.57848e-05	0.0324838	intergenic	InterCpgi
chr7	152397583	-	71.894	5.82114	32.5	8.9476	2.5828e-05	0.0324838	intergenic	InterCpgi
chr20	62170754	PTK6	63.7546	6.8059	27.7381	4.55244	2.59169e-05	0.032485	intergenic	south_shelf
chr1	45208002	KIF2C	95.827	1.25268	84.1153	7.6537	2.59819e-05	0.0324992	intron	south_shelf
chr17	78417932	-	28.3052	3.68069	51.9017	1.55866	2.59746e-05	0.0324992	intergenic	CpG_Island
chr19	16843754	NWD1	6.82766	3.42368	41.5708	7.29326	2.60125e-05	0.0324992	utr5	InterCpgi
chr19	51227215	CLEC11A	10.8034	1.16907	22.4158	1.89325	2.60114e-05	0.0324992	exon	north_shore
chr4	128702887	HSPA4L	17.8617	2.7591	1.72414	1.72414	2.59933e-05	0.0324992	promoter	CpG_Island
chr4	1772142	-	33.8421	2.10007	61.5287	5.43355	2.59832e-05	0.0324992	intergenic	CpG_Island
chr12	133335469	ANKLE2	82.0943	3.16933	60.8861	9.54367	2.6031e-05	0.0325041	intron	north_shore
chr16	77132018	-	76.5052	2.8866	95.0483	2.90107	2.60585e-05	0.0325041	intergenic	InterCpgi
chr7	5735112	RNF216	23.3816	4.78061	48.2023	4.29667	2.6054e-05	0.0325041	intron	InterCpgi
chr17	77999267	TBC1D16	52.4577	3.05994	32.4736	6.04282	2.60865e-05	0.0325215	utr5	south_shore
chr1	73222632	-	96.9687	1.14431	74.5554	6.21615	2.6114e-05	0.0325382	intergenic	InterCpgi
chr11	66446328	RBM4B	18.6688	2.88235	49.8798	8.76226	2.6147e-05	0.0325443	promoter	south_shore
chr1	238964887	-	48.0773	3.53798	26.6101	2.84284	2.61388e-05	0.0325443	intergenic	InterCpgi
chr1	1961437	GABRD	87.5389	2.84882	100	0	2.61859e-05	0.0325752	exon	CpG_Island
chr11	68771596	-	74.127	3.91281	97.9167	2.08333	2.62997e-05	0.0326993	intergenic	north_shore
chr7	71296760	CALN1	98.4341	1.01089	87.063	1.91347	2.64192e-05	0.0328302	intron	InterCpgi
chr15	36124326	-	96.6924	0.964805	87.7632	5.24946	2.65131e-05	0.0329293	intergenic	InterCpgi
chr15	80445824	FAH	1.49554	0.554826	9.19831	2.46797	2.65739e-05	0.0329517	intron	InterCpgi
chr6	51275434	-	31.8624	6.49243	60.463	3.89296	2.6562e-05	0.0329517	intergenic	InterCpgi
chr8	10492643	RP1L1	88.0193	2.79555	99.4792	0.520833	2.65493e-05	0.0329517	utr5	InterCpgi
chr3	98450272	ST3GAL6	91.8108	1.92008	100	0	2.65883e-05	0.0329519	promoter	north_shore
chr5	50870	-	85.8161	4.24203	50.7143	7.66233	2.67405e-05	0.0331227	intergenic	CpG_Island
chr1	151967017	S100A10	4.45109	1.15438	20.1882	5.47067	2.67726e-05	0.0331271	promoter	south_shore
chr1	228596064	TRIM17	98.0159	1.98413	72.1289	4.74333	2.677e-05	0.0331271	promoter	south_shore
chr1	228596064	TRIM11	98.0159	1.98413	72.1289	4.74333	2.677e-05	0.0331271	promoter	south_shore
chr2	172116316	-	95.6656	2.26357	61.1169	12.6399	2.68027e-05	0.0331466	intergenic	InterCpgi
chr10	134333468	-	30.7472	3.53999	66.9322	4.6081	2.68348e-05	0.0331553	intergenic	InterCpgi
chr11	129733360	-	100	0	86.4088	4.85244	2.68384e-05	0.0331553	intergenic	InterCpgi
chr15	91072701	CRTC3	0.936851	0.54463	7.25506	1.23137	2.6894e-05	0.0332045	promoter	CpG_Island
chr22	31604213	LIMK2	21.4675	2.68205	42.4388	1.29196	2.69069e-05	0.0332045	intergenic	north_shelf
chr16	88994242	CBFA2T3	29.9744	3.40011	7.7381	2.97619	2.69319e-05	0.0332177	utr5	CpG_Island
chr1	53589271	SLC1A7	32.7731	8.26687	75.2083	6.18368	2.69847e-05	0.0332651	intron	InterCpgi
chr1	93636957	TMED5	32.5162	2.06469	23.9571	5.84454	2.70238e-05	0.0332955	intron	InterCpgi
chr5	53836983	SNX18	70.7045	3.05522	89.7484	3.87702	2.71165e-05	0.0333756	intron	InterCpgi
chr8	8634264	-	91.3086	1.36833	98.7798	0.704924	2.71176e-05	0.0333756	intergenic	InterCpgi
chr10	77158991	NCRNA00245	31.9205	5.63072	76.8579	9.72838	2.7148e-05	0.0333952	exon	CpG_Island
chr10	77158991	ZNF503	31.9205	5.63072	76.8579	9.72838	2.7148e-05	0.0333952	exon	CpG_Island
[truncated: 888 more rows]
